# Supplementary material for: The Proteomic Investigation of Chromatin Functional Domains Reveals Novel Synergisms among Distinct Heterochromatin Components
Source: PubMed Central journal article supplement — Mol Cell Proteomics. 2013 Jan 14;12(3):764–80. doi: 10.1074/mcp.M112.024307 (PMC3591667; doi:10.1074/mcp.m112.024307), 2013-01-14

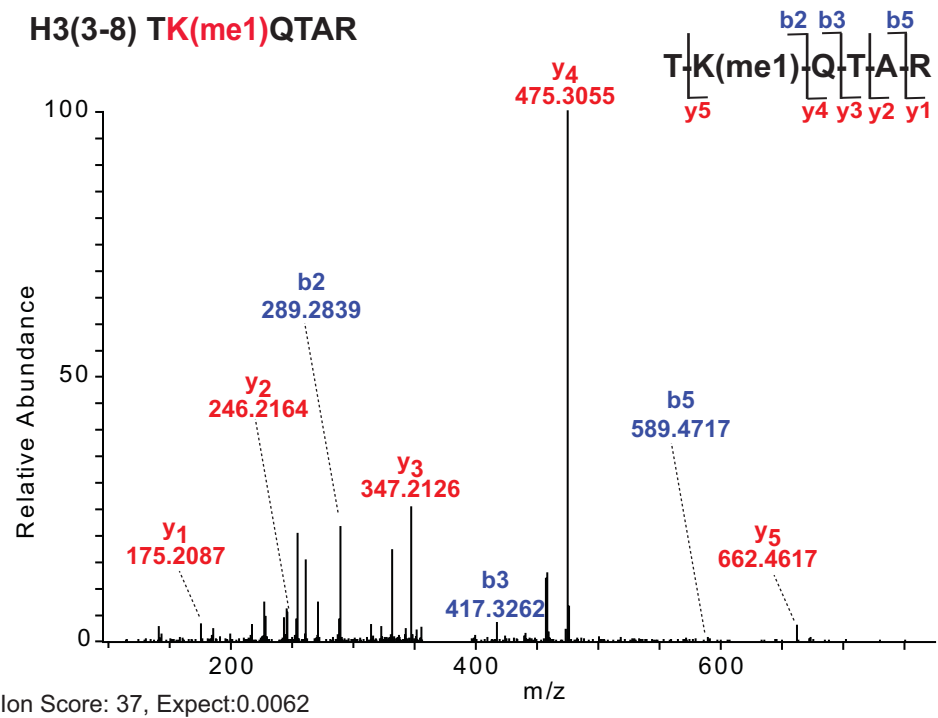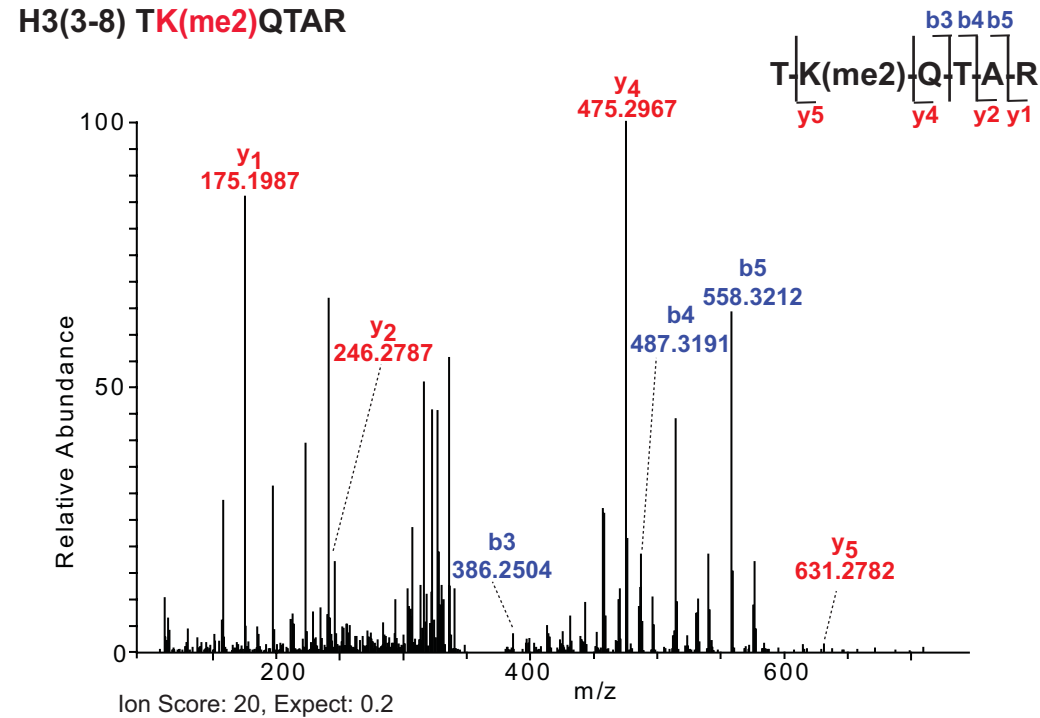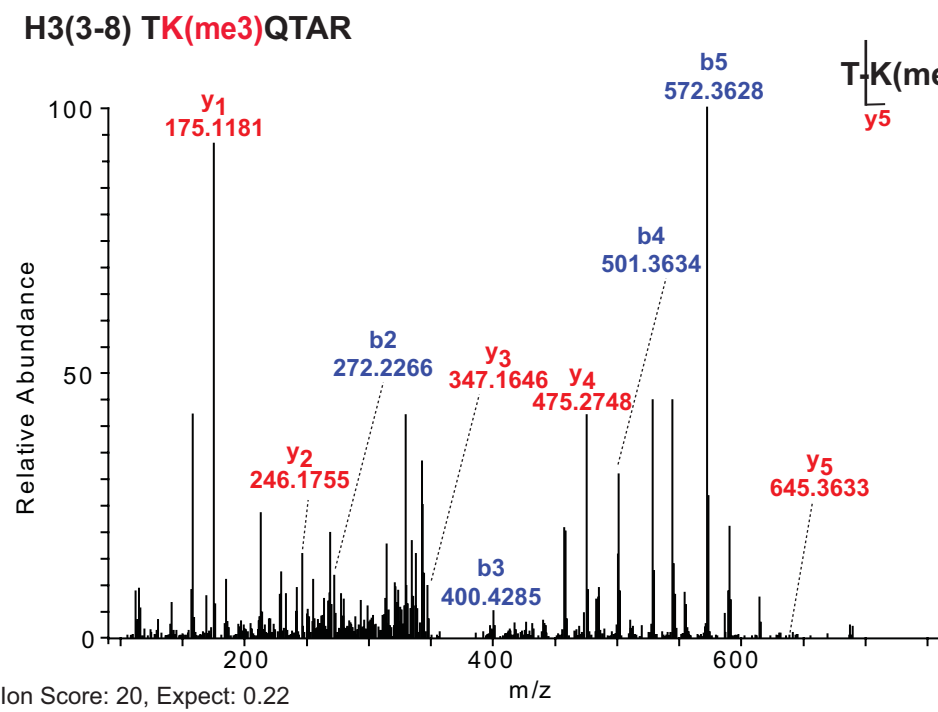

### H3(9-17) K(me1)STGGKAPR

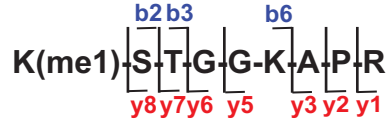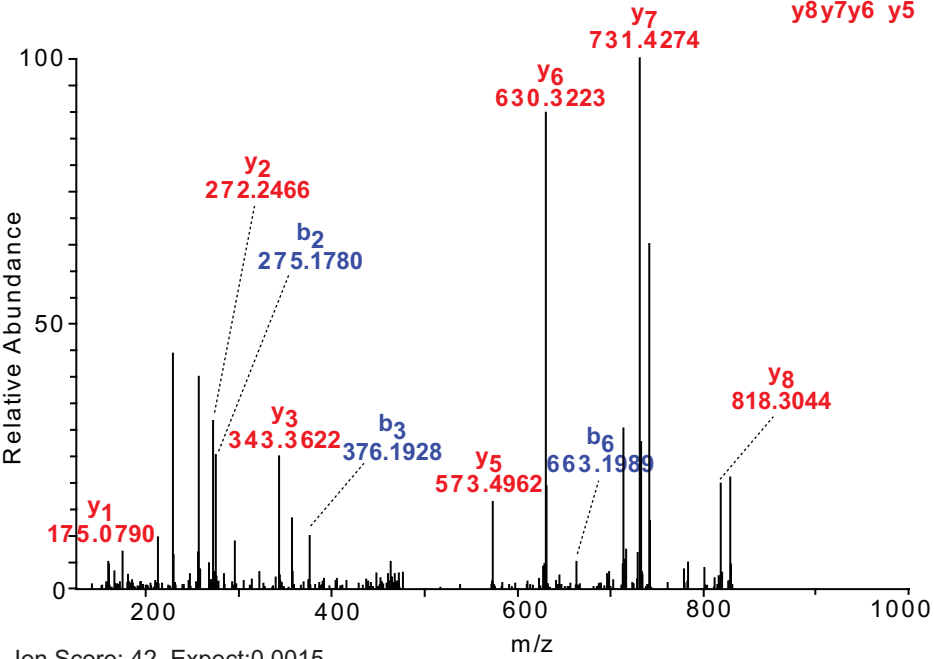

### H3(9-17) K(me2)STGGKAPR

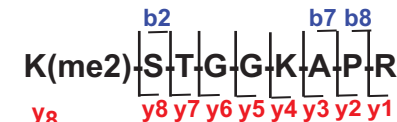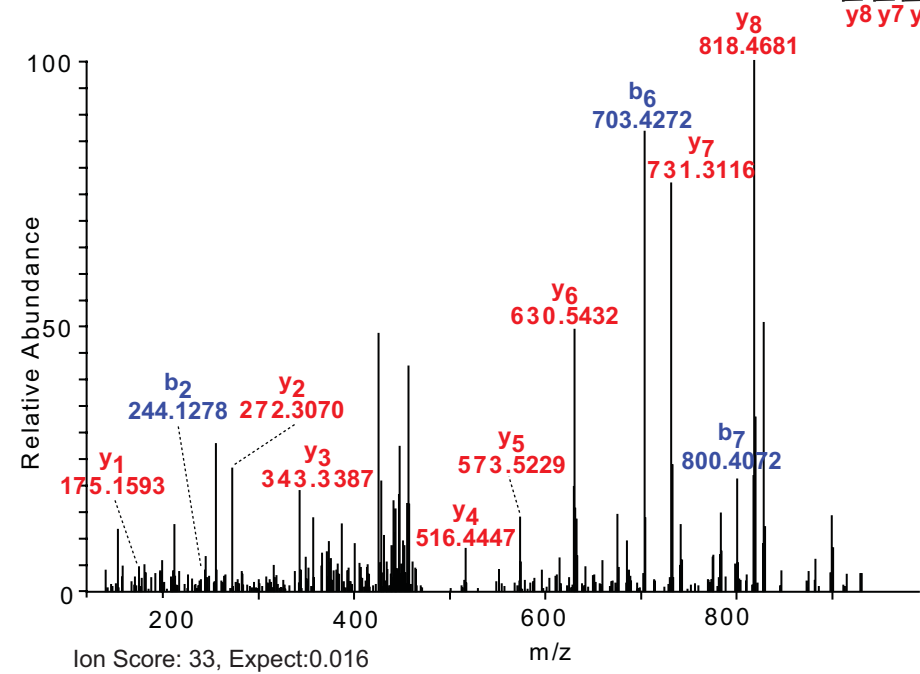

### H3(9-17) K(me3)STGGKAPR

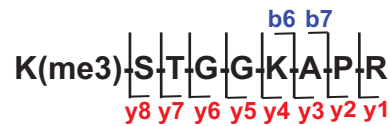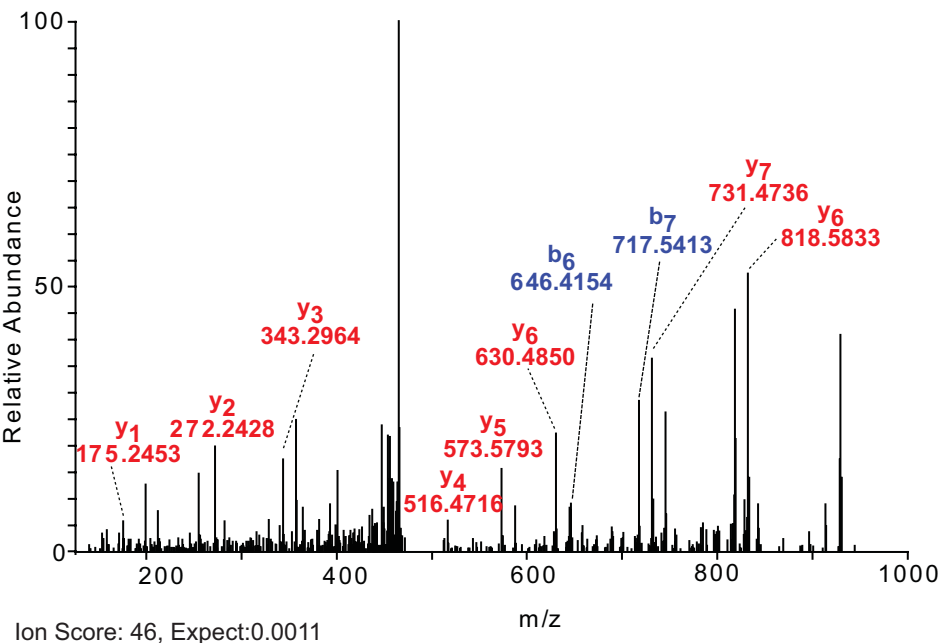

### H3(9-17) KSTGGK(Ac)APR

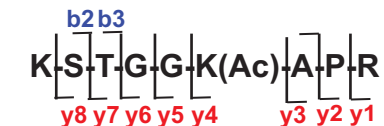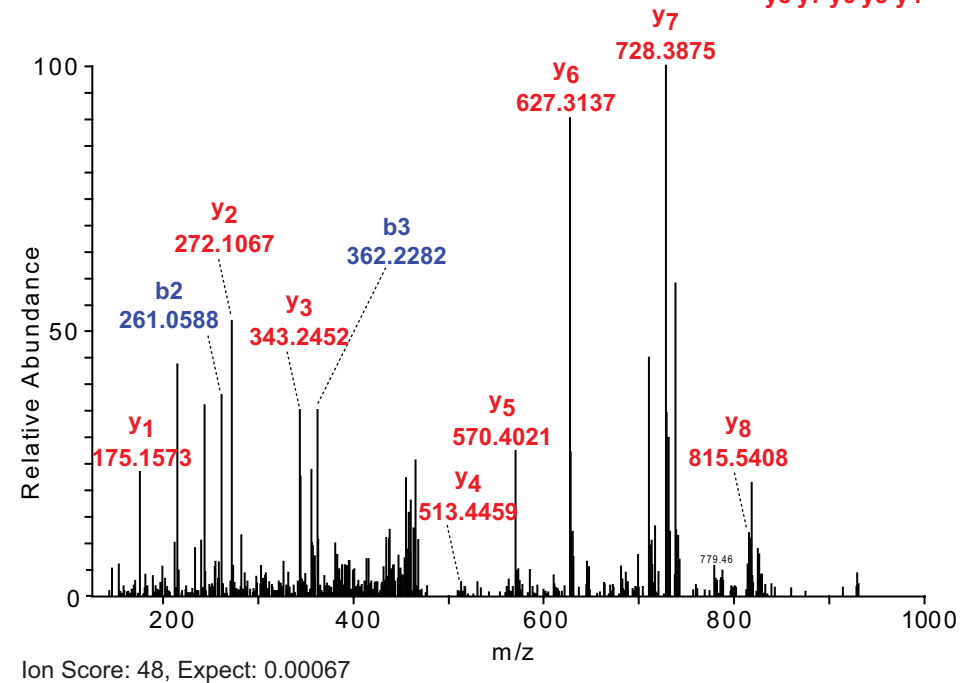

H3(9-17) K(me1)STGGK(Ac)APR

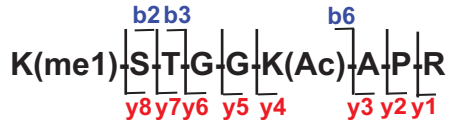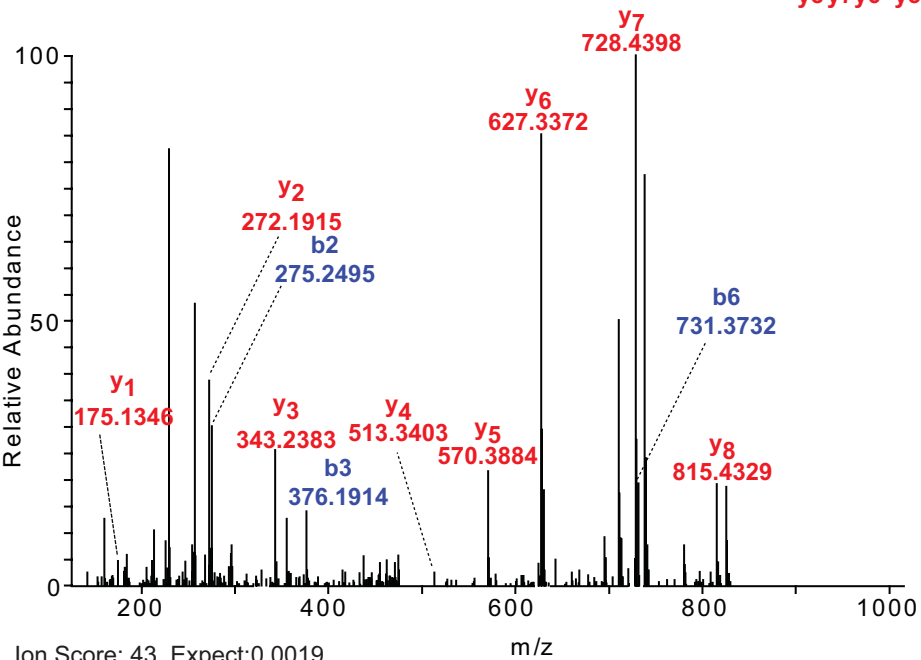

H3(9-17) K(me2)STGGK(Ac)APR

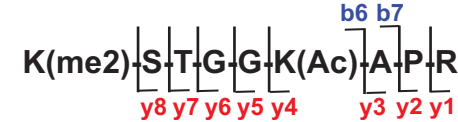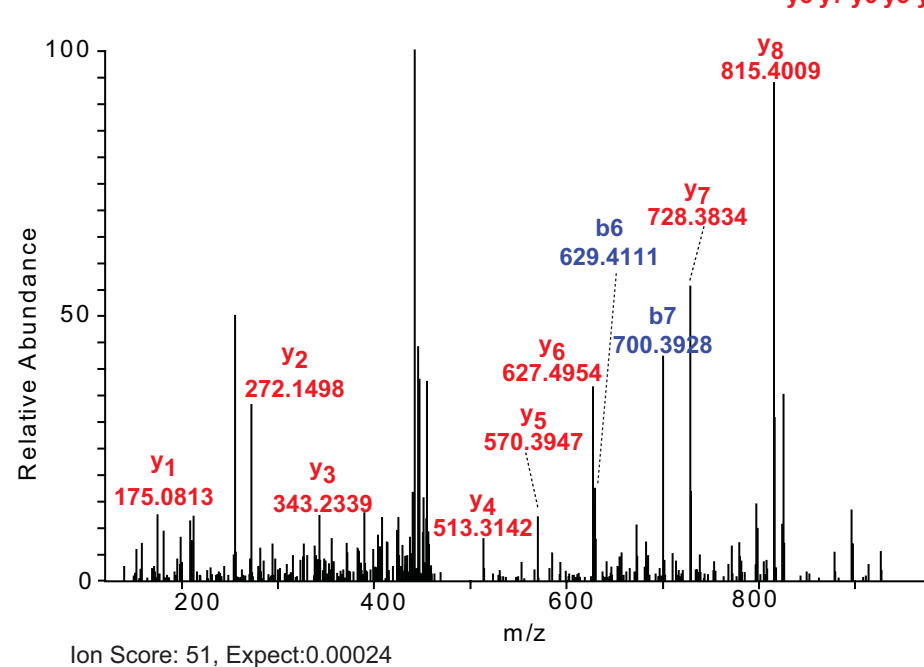

H3(9-17) K(me3)STGGK(Ac)APR

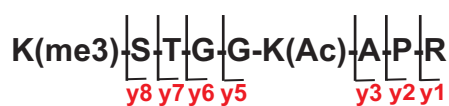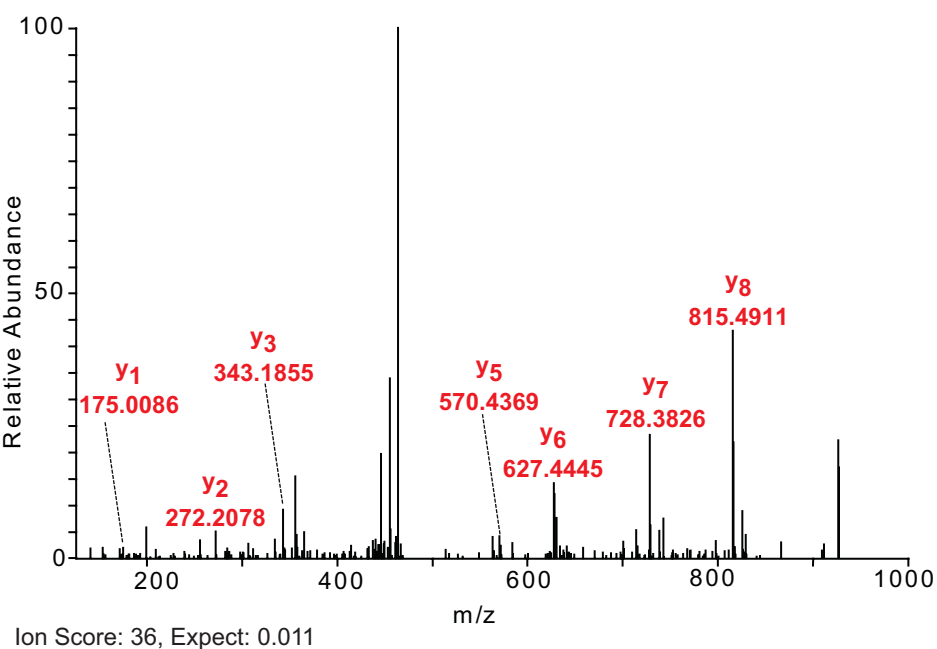

H3(9-17) K(Ac)STGGK(Ac)APR

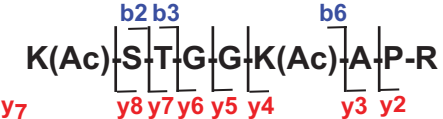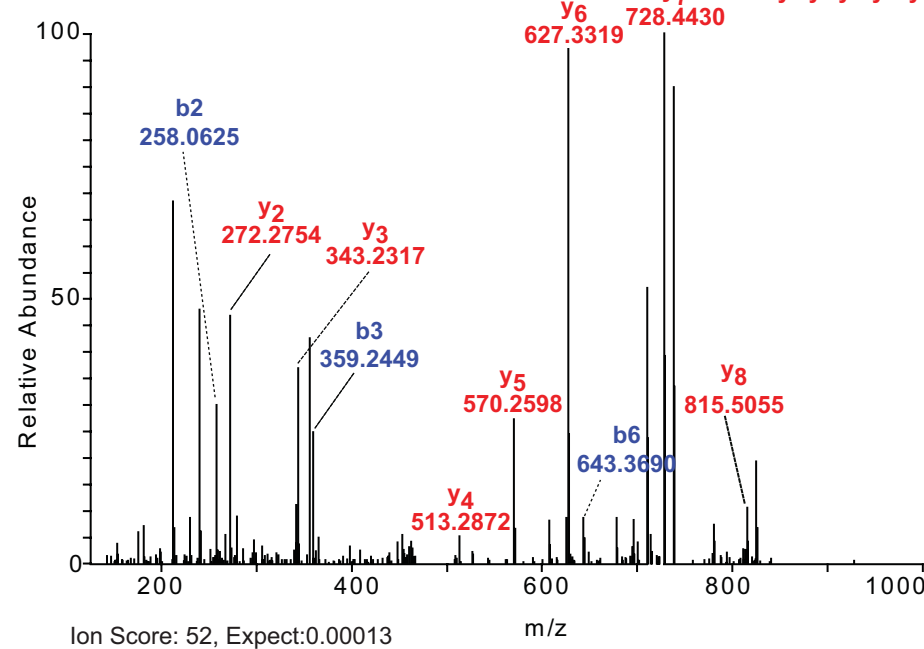

Monoisotopic mass of neutral peptide Mr(calc): 1089.6777

Variable modifications:

K1 : Methyl+Acetyl:2H(3) (K)

K6 : Acetyl:2H(3) (K)

Ions Score: 55 Expect: 6.4e-05

Matches : 14/80 fragment ions using 19 most intense peaks

| # | b        | b <sup>++</sup> | b <sup>*</sup> | b <sup>***</sup> | b <sup>0</sup> | b <sup>0++</sup> | Seq. | y        | y <sup>++</sup> | y <sup>*</sup> | y <sup>***</sup> | y <sup>0</sup> | y <sup>0++</sup> | # |
|---|----------|-----------------|----------------|------------------|----------------|------------------|------|----------|-----------------|----------------|------------------|----------------|------------------|---|
| 1 | 188.1473 | 94.5773         | 171.1207       | 86.064           |                |                  | K    |          |                 |                |                  |                |                  | 9 |
| 2 | 316.2059 | 158.6066        | 299.1793       | 150.0933         |                |                  | Q    | 903.545  | 452.2761        | 886.5184       | 443.7629         | 885.5344       | 443.2708         | 8 |
| 3 | 429.2899 | 215.1486        | 412.2634       | 206.6353         |                |                  | L    | 775.4864 | 388.2468        | 758.4598       | 379.7336         | 757.4758       | 379.2416         | 7 |
| 4 | 500.327  | 250.6672        | 483.3005       | 242.1539         |                |                  | A    | 662.4023 | 331.7048        | 645.3758       | 323.1915         | 644.3918       | 322.6995         | 6 |
| 5 | 601.3747 | 301.191         | 584.3482       | 292.6777         | 583.3642       | 292.1857         | T    | 591.3652 | 296.1862        | 574.3387       | 287.673          | 573.3547       | 287.181          | 5 |
| 6 | 774.4991 | 387.7532        | 757.4725       | 379.2399         | 756.4885       | 378.7479         | K    | 490.3175 | 245.6624        | 473.291        | 237.1491         |                |                  | 4 |
| 7 | 845.5362 | 423.2717        | 828.5096       | 414.7585         | 827.5256       | 414.2665         | A    | 317.1932 | 159.1002        | 300.1666       | 150.587          |                |                  | 3 |
| 8 | 916.5733 | 458.7903        | 899.5468       | 450.277          | 898.5627       | 449.785          | A    | 246.1561 | 123.5817        | 229.1295       | 115.0684         |                |                  | 2 |
| 9 |          |                 |                |                  |                |                  | R    | 175.119  | 88.0631         | 158.0924       | 79.5498          |                |                  | 1 |

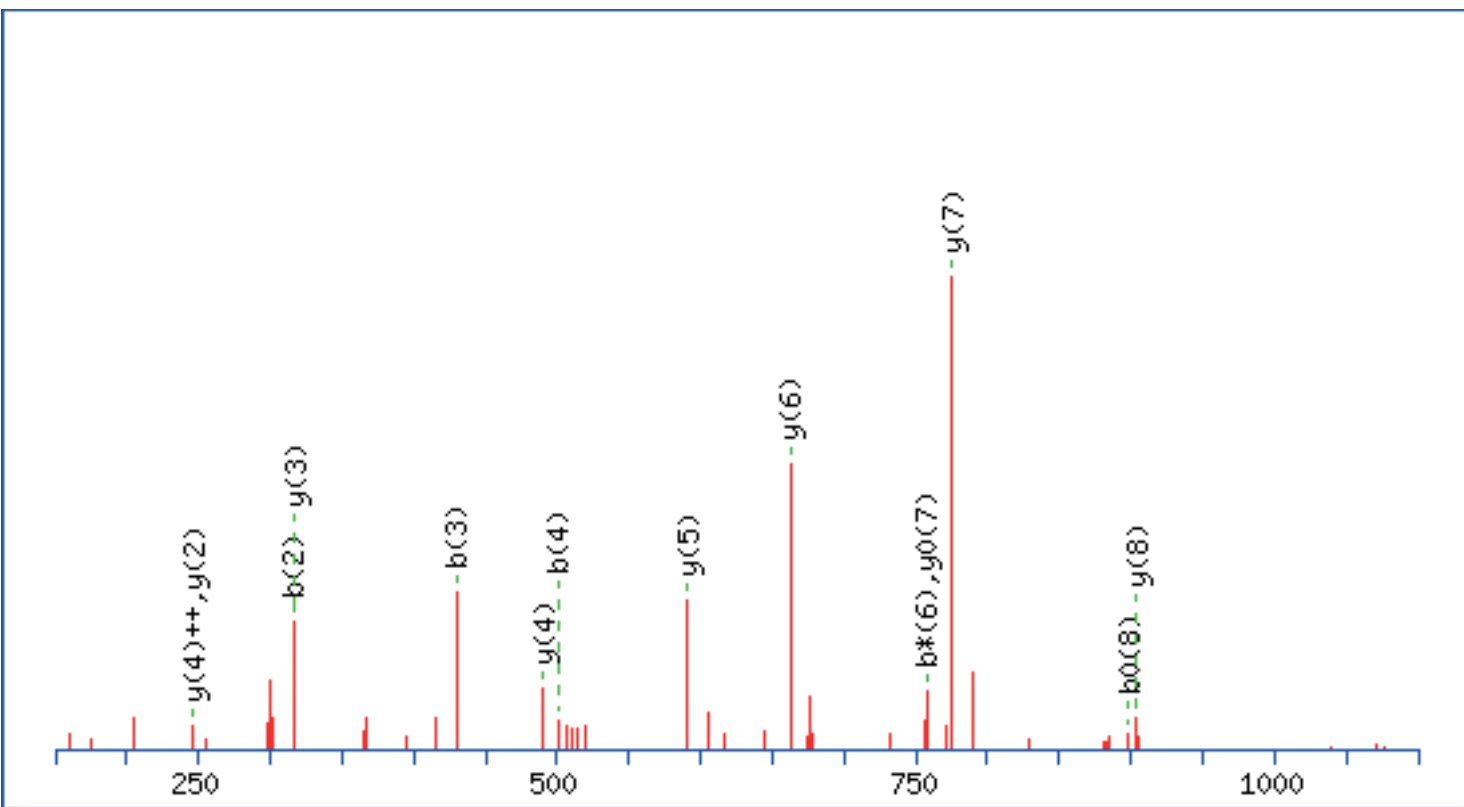

#2966 RT: 45.34

T: ITMS + c NSI d w Full ms2 545.85@cid35.00 [140.00-1105.00]

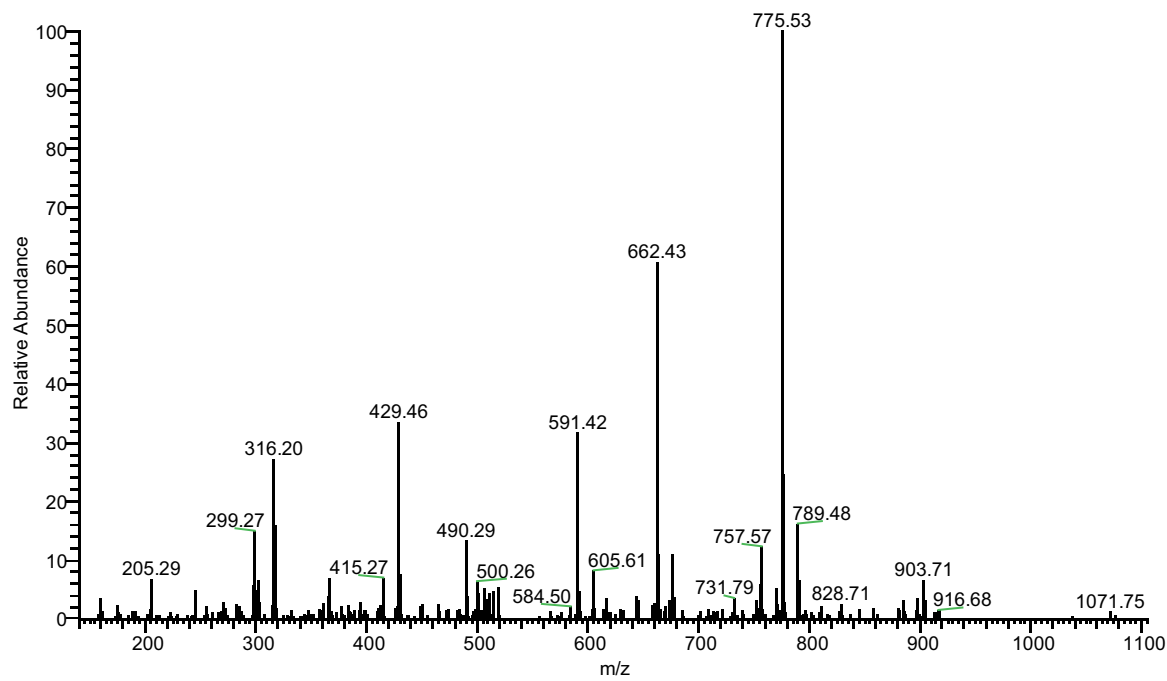

Monoisotopic mass of neutral peptide Mr(calc): 1086.6588

Variable modifications:

K1 : Methyl+Acetyl:2H(3) (K)

K6 : Acetyl (K)

Ions Score: 31 Expect: 0.0076

Matches : 14/80 fragment ions using 36 most intense peaks

| # | b               | b <sup>++</sup> | b*              | b <sup>*++</sup> | b <sup>0</sup> | b <sup>0++</sup> | Seq. | γ               | γ <sup>++</sup> | γ*             | γ <sup>*++</sup> | γ <sup>0</sup> | γ <sup>0++</sup> | # |
|---|-----------------|-----------------|-----------------|------------------|----------------|------------------|------|-----------------|-----------------|----------------|------------------|----------------|------------------|---|
| 1 | 188.1473        | 94.5773         | 171.1207        | 86.064           |                |                  | K    |                 |                 |                |                  |                |                  | 9 |
| 2 | <b>316.2059</b> | 158.6066        | <b>299.1793</b> | 150.0933         |                |                  | Q    | <b>900.5261</b> | 450.7667        | 883.4996       | 442.2534         | 882.5156       | 441.7614         | 8 |
| 3 | <b>429.2899</b> | 215.1486        | 412.2634        | 206.6353         |                |                  | L    | <b>772.4676</b> | <b>386.7374</b> | 755.441        | 378.2241         | 754.457        | 377.7321         | 7 |
| 4 | <b>500.327</b>  | 250.6672        | 483.3005        | 242.1539         |                |                  | A    | <b>659.3835</b> | 330.1954        | <b>642.357</b> | 321.6821         | 641.3729       | 321.1901         | 6 |
| 5 | 601.3747        | 301.191         | 584.3482        | 292.6777         | 583.3642       | 292.1857         | T    | <b>588.3464</b> | 294.6768        | 571.3198       | 286.1636         | 570.3358       | 285.6715         | 5 |
| 6 | 771.4802        | <b>386.2438</b> | 754.4537        | 377.7305         | 753.4697       | 377.2385         | K    | <b>487.2987</b> | 244.153         | 470.2722       | 235.6397         |                |                  | 4 |
| 7 | 842.5174        | 421.7623        | 825.4908        | 413.249          | 824.5068       | 412.757          | A    | 317.1932        | 159.1002        | 300.1666       | 150.587          |                |                  | 3 |
| 8 | 913.5545        | 457.2809        | 896.5279        | 448.7676         | 895.5439       | 448.2756         | A    | <b>246.1561</b> | 123.5817        | 229.1295       | 115.0684         |                |                  | 2 |
| 9 |                 |                 |                 |                  |                |                  | R    | <b>175.119</b>  | 88.0631         | 158.0924       | 79.5498          |                |                  | 1 |

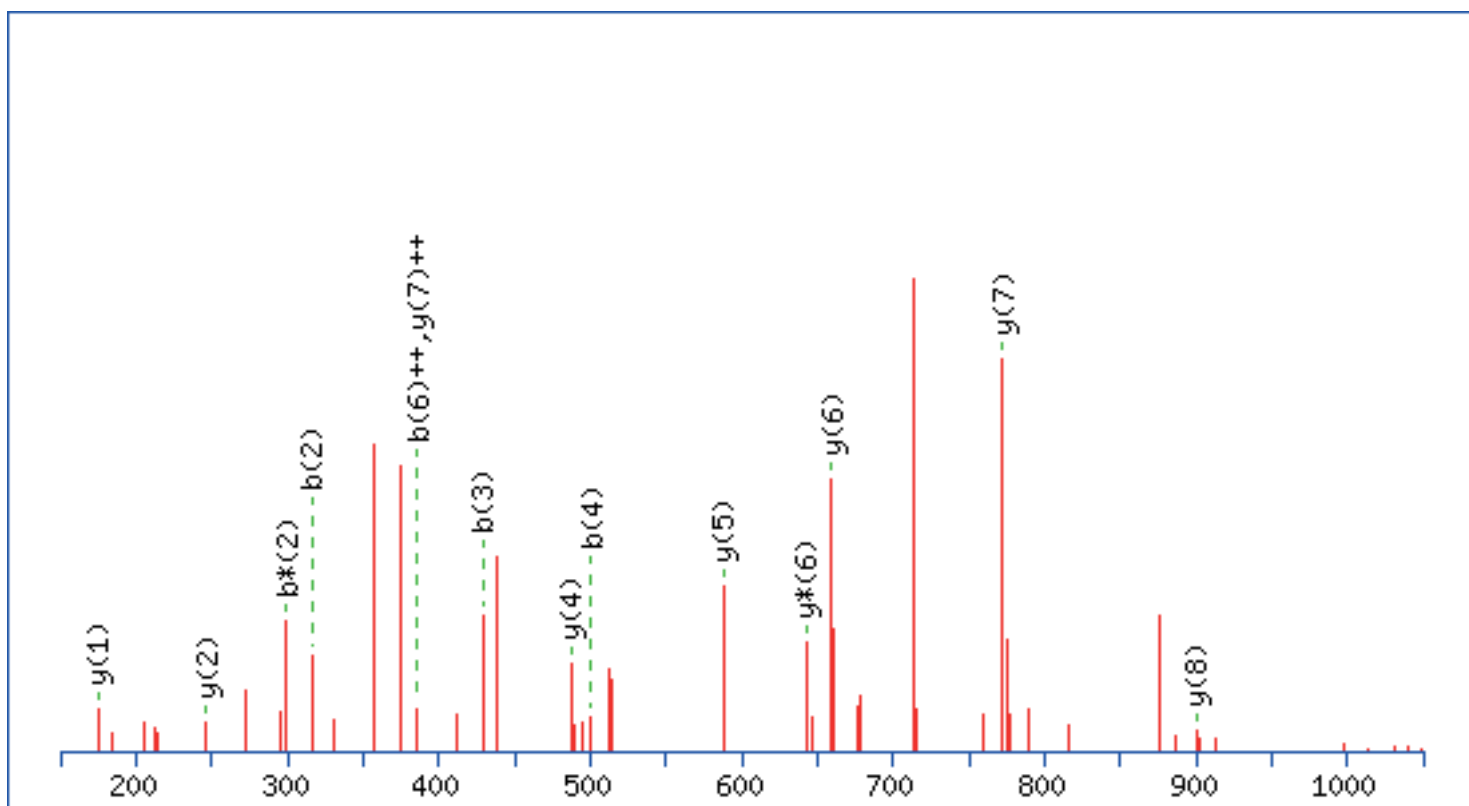

#3894 RT: 46.44

T: ITMS + c NSI d w Full ms2 544.33@cid35.00 [135.00-1100.00]

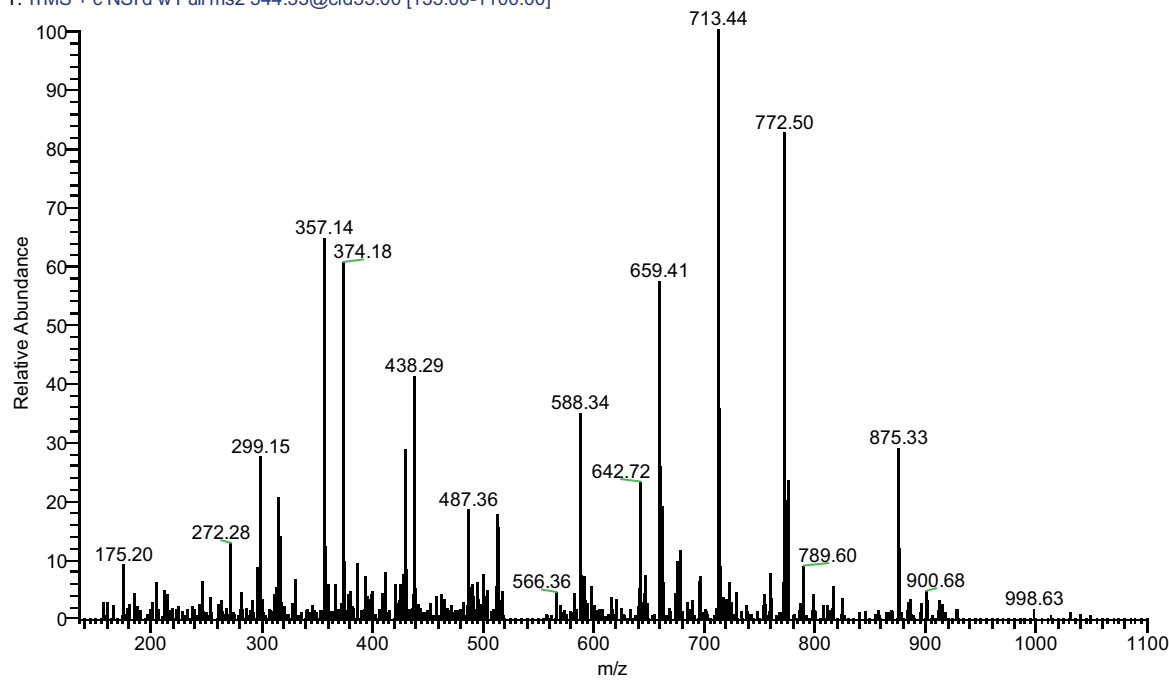

Monoisotopic mass of neutral peptide Mr(calc): 1072.6432

Variable modifications:

K1 : Acetyl:2H(3) (K)

K6 : Acetyl (K)

Ions Score: 69 Expect: 4.1e-06

Matches : 13/80 fragment ions using 18 most intense peaks

| # | b        | b <sup>++</sup> | b*       | b <sup>*+</sup> | b <sup>0</sup> | b <sup>0+</sup> | Seq. | γ        | γ <sup>+</sup> | γ*       | γ <sup>*+</sup> | γ <sup>0</sup> | γ <sup>0+</sup> | # |
|---|----------|-----------------|----------|-----------------|----------------|-----------------|------|----------|----------------|----------|-----------------|----------------|-----------------|---|
| 1 | 174.1316 | 87.5695         | 157.1051 | 79.0562         |                |                 | K    |          |                |          |                 |                |                 | 9 |
| 2 | 302.1902 | 151.5987        | 285.1637 | 143.0855        |                |                 | Q    | 900.5261 | 450.7667       | 883.4996 | 442.2534        | 882.5156       | 441.7614        | 8 |
| 3 | 415.2743 | 208.1408        | 398.2477 | 199.6275        |                |                 | L    | 772.4676 | 386.7374       | 755.441  | 378.2241        | 754.457        | 377.7321        | 7 |
| 4 | 486.3114 | 243.6593        | 469.2848 | 235.1461        |                |                 | A    | 659.3835 | 330.1954       | 642.357  | 321.6821        | 641.3729       | 321.1901        | 6 |
| 5 | 587.3591 | 294.1832        | 570.3325 | 285.6699        | 569.3485       | 285.1779        | T    | 588.3464 | 294.6768       | 571.3198 | 286.1636        | 570.3358       | 285.6715        | 5 |
| 6 | 757.4646 | 379.2359        | 740.438  | 370.7227        | 739.454        | 370.2307        | K    | 487.2987 | 244.153        | 470.2722 | 235.6397        |                |                 | 4 |
| 7 | 828.5017 | 414.7545        | 811.4752 | 406.2412        | 810.4911       | 405.7492        | A    | 317.1932 | 159.1002       | 300.1666 | 150.587         |                |                 | 3 |
| 8 | 899.5388 | 450.2731        | 882.5123 | 441.7598        | 881.5283       | 441.2678        | A    | 246.1561 | 123.5817       | 229.1295 | 115.0684        |                |                 | 2 |
| 9 |          |                 |          |                 |                |                 | R    | 175.119  | 88.0631        | 158.0924 | 79.5498         |                |                 | 1 |

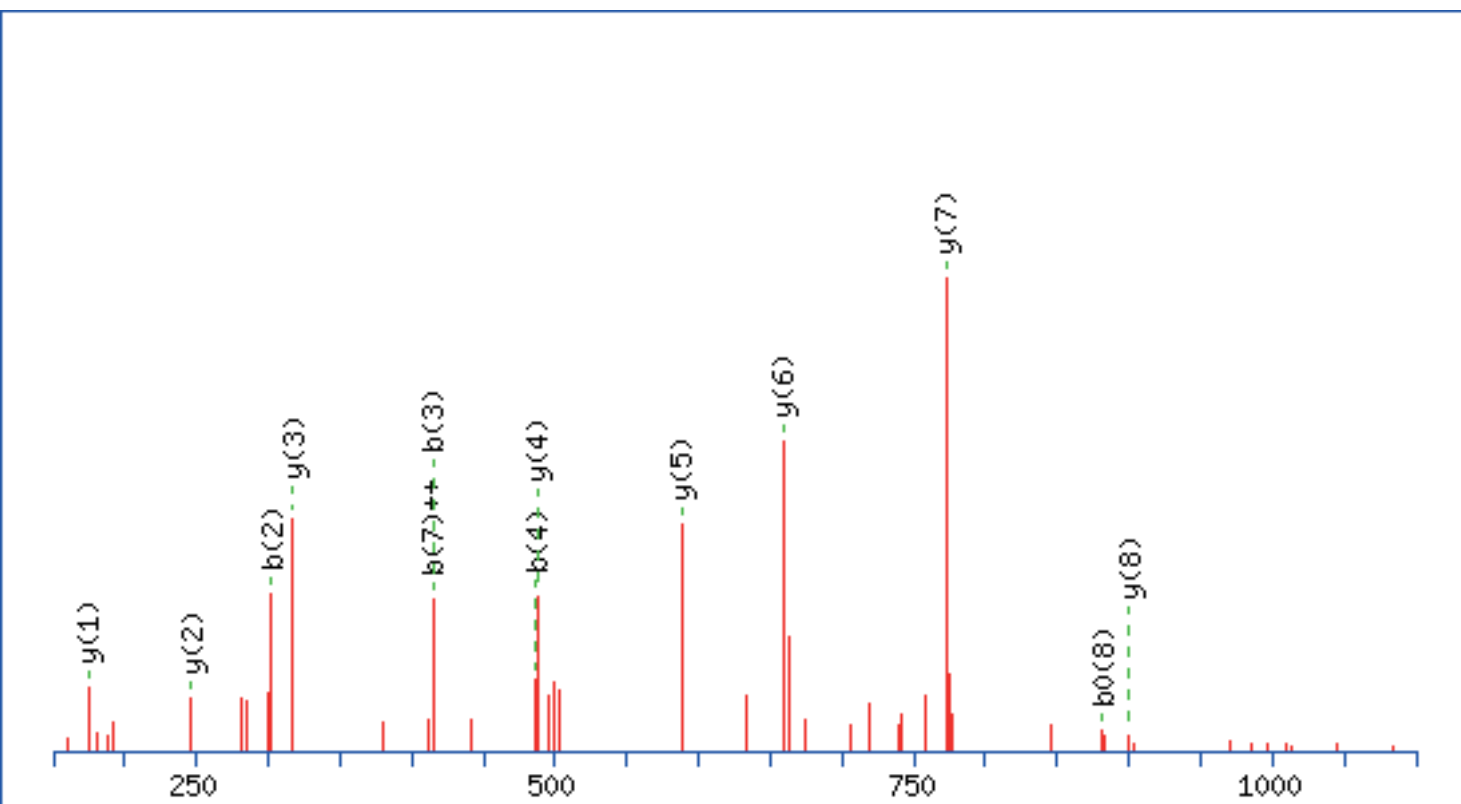

#3213 RT: 40.19

T: ITMS + c NSI d w Full ms2 537.32@cid35.00 [135.00-1085.00]

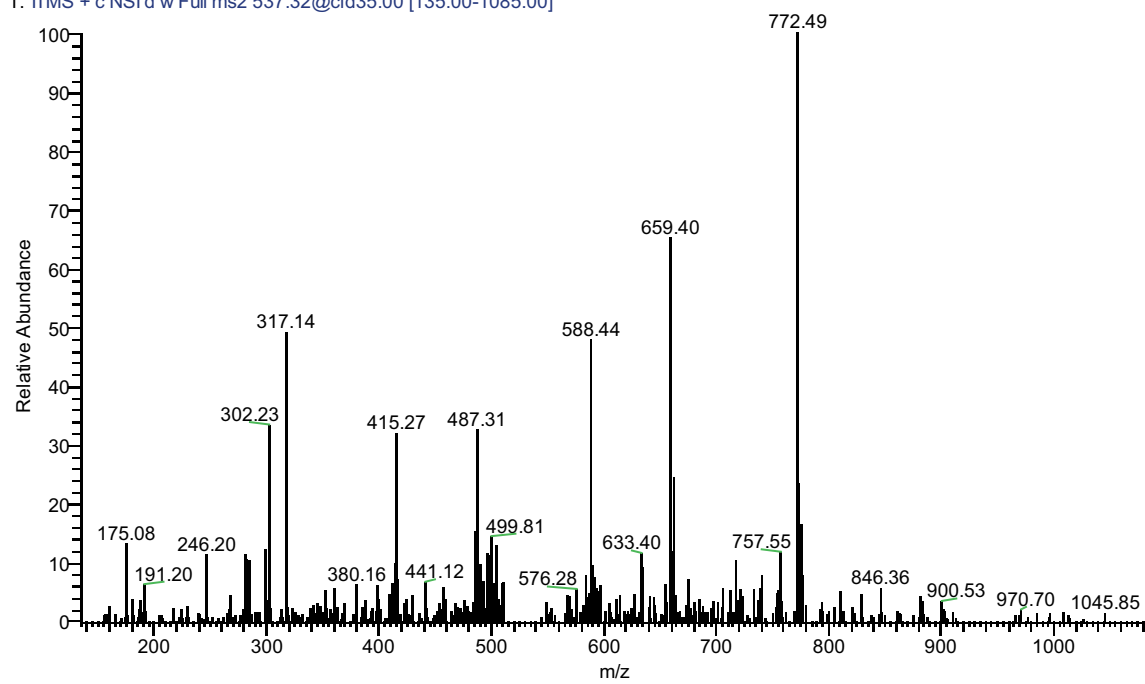

Monoisotopic mass of neutral peptide Mr(calc): 1069.6243

Variable modifications:

K1 : Acetyl (K)

K6 : Acetyl (K)

Ions Score: 63 Expect: 6.1e-06

Matches : 18/80 fragment ions using 25 most intense peaks

| # | b              | b <sup>++</sup> | b*       | b <sup>*++</sup> | b <sup>0</sup>  | b <sup>0++</sup> | Seq. | y              | y <sup>++</sup> | y*       | y <sup>*++</sup> | y <sup>0</sup>  | y <sup>0++</sup> | # |
|---|----------------|-----------------|----------|------------------|-----------------|------------------|------|----------------|-----------------|----------|------------------|-----------------|------------------|---|
| 1 | 171.1128       | 86.06           | 154.0863 | 77.5468          |                 |                  | K    |                |                 |          |                  |                 |                  | 9 |
| 2 | <b>299.171</b> | 150.0893        | 282.1448 | 141.5761         |                 |                  | Q    | <b>900.526</b> | 450.7667        | 883.4996 | <b>442.2534</b>  | 882.5156        | <b>441.7614</b>  | 8 |
| 3 | <b>412.255</b> | 206.6314        | 395.2289 | 198.1181         |                 |                  | L    | <b>772.468</b> | 386.7374        | 755.441  | 378.2241         | <b>754.457</b>  | 377.7321         | 7 |
| 4 | <b>483.293</b> | 242.1499        | 466.266  | 233.6366         |                 |                  | A    | <b>659.384</b> | 330.1954        | 642.357  | 321.6821         | <b>641.3729</b> | 321.1901         | 6 |
| 5 | 584.3402       | 292.6738        | 567.3137 | 284.1605         | 566.3297        | 283.6685         | T    | <b>588.346</b> | 294.6768        | 571.3198 | 286.1636         | 570.3358        | 285.6715         | 5 |
| 6 | <b>754.446</b> | 377.7265        | 737.4192 | 369.2132         | 736.4352        | 368.7212         | K    | <b>487.299</b> | 244.153         | 470.2722 | 235.6397         |                 |                  | 4 |
| 7 | 825.4829       | <b>413.2451</b> | 808.4563 | 404.7318         | 807.4723        | 404.2398         | A    | <b>317.193</b> | 159.1002        | 300.1666 | 150.587          |                 |                  | 3 |
| 8 | 896.52         | 448.7636        | 879.4934 | 440.2504         | <b>878.5094</b> | 439.7584         | A    | <b>246.156</b> | 123.5817        | 229.1295 | 115.0684         |                 |                  | 2 |
| 9 |                |                 |          |                  |                 |                  | R    | <b>175.119</b> | 88.0631         | 158.0924 | 79.5498          |                 |                  | 1 |

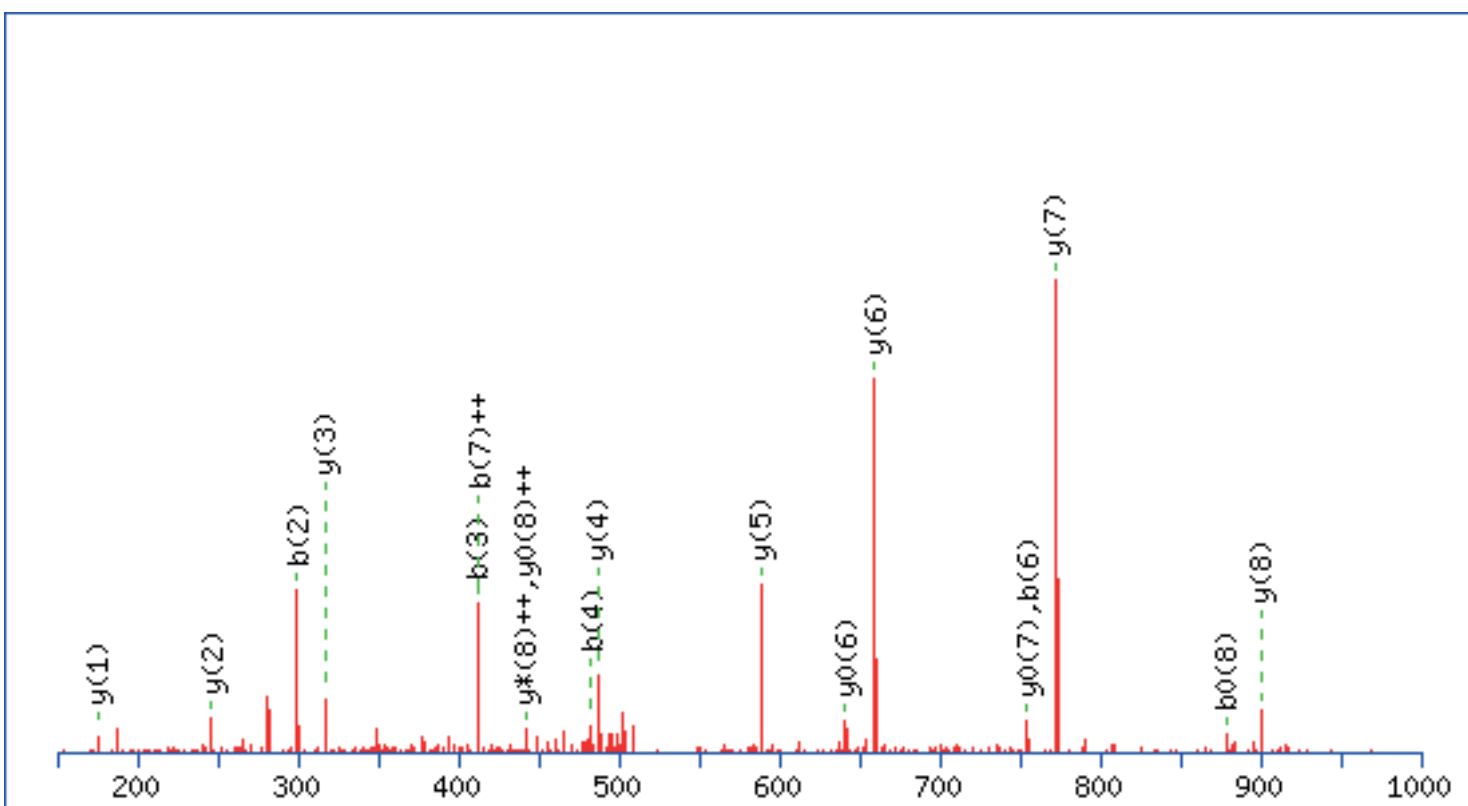

#4653 RT: 45.32  
 T: ITMS + c NSI d w Full ms2 535.82@cid35.00 [135.00-1085.00]

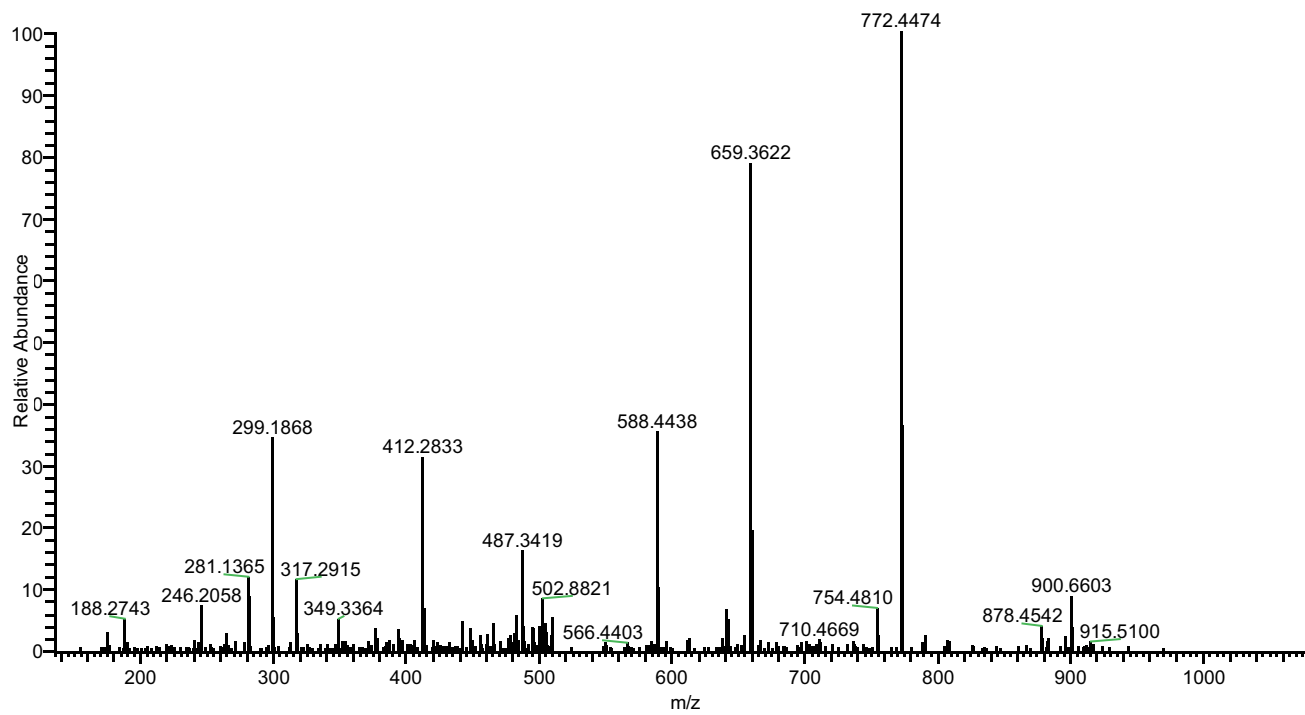

Match to Query 6918: 1581.934028 from(791.974290,2+)  
 1 cycles: 1 preIntensity: 7858579.2 FinneganScanNumber: 3174

(27-40) H3:  
**K(me1)SAPATGGVKKPHR**

Monoisotopic mass of neutral peptide Mr(calc): 1581.9301

Variable modifications:

K1 : Methyl+Acetyl:2H(3) (K) K11 : Acetyl:2H(3) (K)

K10 : Acetyl:2H(3) (K)

Ions Score: 59 Expect: 9.2e-06

Matches : 24/138 fragment ions using 36 most intense peaks

| #  | b               | b <sup>+</sup> | b <sup>*</sup>  | b <sup>++</sup> | b <sup>0</sup>  | b <sup>0+</sup> | Seq. | y               | y <sup>+</sup>  | y <sup>*</sup> | y <sup>++</sup> | y <sup>0</sup> | y <sup>0+</sup> | #  |
|----|-----------------|----------------|-----------------|-----------------|-----------------|-----------------|------|-----------------|-----------------|----------------|-----------------|----------------|-----------------|----|
| 1  | 188.1473        | 94.5773        | 171.1207        | 86.064          |                 |                 | K    |                 |                 |                |                 |                |                 | 14 |
| 2  | <b>275.1793</b> | 138.0933       | 258.1528        | 129.58          | 257.1687        | 129.088         | S    | 1395.797        | 698.4023        | 1378.771       | 689.8891        | 1377.787       | 689.397         | 13 |
| 3  | <b>346.2164</b> | 173.6119       | 329.1899        | 165.0986        | 328.2059        | 164.6066        | A    | <b>1308.765</b> | <b>654.8863</b> | 1291.739       | 646.373         | 1290.755       | 645.881         | 12 |
| 4  | 443.2692        | 222.1382       | 426.2426        | 213.625         | 425.2586        | 213.133         | P    | <b>1237.728</b> | <b>619.3678</b> | 1220.702       | <b>610.8545</b> | 1219.718       | <b>610.3625</b> | 11 |
| 5  | 514.3063        | 257.6568       | 497.2798        | 249.1435        | 496.2957        | 248.6515        | A    | <b>1140.676</b> | 570.8414        | 1123.649       | 562.3281        | 1122.665       | 561.8361        | 10 |
| 6  | 615.354         | 308.1806       | 598.3274        | 299.6674        | 597.3434        | 299.1753        | T    | <b>1069.638</b> | <b>535.3228</b> | 1052.612       | 526.8095        | 1051.628       | <b>526.3175</b> | 9  |
| 7  | 672.3754        | 336.6914       | <b>655.3489</b> | 328.1781        | 654.3649        | 327.6861        | G    | <b>968.5907</b> | 484.799         | 951.5641       | 476.2857        |                |                 | 8  |
| 8  | 729.3969        | 365.2021       | <b>712.3704</b> | 356.6888        | 711.3863        | 356.1968        | G    | <b>911.5692</b> | 456.2882        | 894.5427       | 447.775         |                |                 | 7  |
| 9  | 828.4653        | 414.7363       | <b>811.4388</b> | 406.223         | 810.4548        | 405.731         | V    | 854.5478        | 427.7775        | 837.5212       | 419.2642        |                |                 | 6  |
| 10 | 1001.59         | 501.2985       | 984.5631        | 492.7852        | <b>983.5791</b> | 492.2932        | K    | <b>755.4793</b> | 378.2433        | 738.4528       | 369.73          |                |                 | 5  |
| 11 | <b>1174.714</b> | 587.8607       | 1157.688        | 579.3474        | 1156.704        | 578.8554        | K    | <b>582.355</b>  | 291.6811        | 565.3284       | 283.1679        |                |                 | 4  |
| 12 | 1271.767        | 636.387        | 1254.74         | 627.8738        | 1253.756        | 627.3818        | P    | <b>409.2306</b> | 205.119         | 392.2041       | 196.6057        |                |                 | 3  |
| 13 | <b>1408.826</b> | 704.9165       | 1391.799        | 696.4032        | <b>1390.815</b> | 695.9112        | H    | 312.1779        | 156.5926        | 295.1513       | 148.0793        |                |                 | 2  |
| 14 |                 |                |                 |                 |                 |                 | R    | 175.119         | 88.0631         | 158.0924       | 79.5498         |                |                 | 1  |

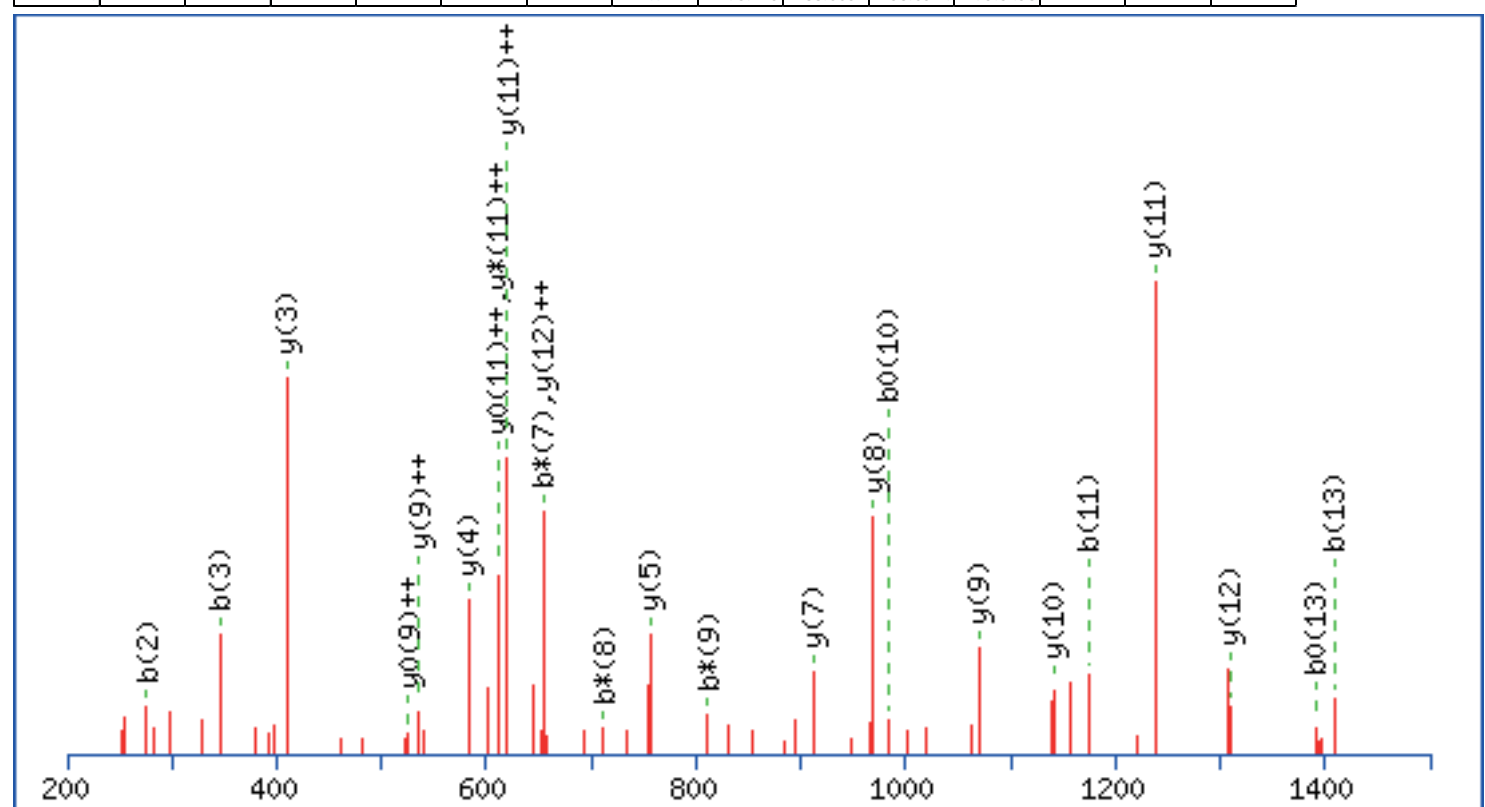

#3174 RT: 46.32  
 T: ITMS + c NSI d w Full ms2 791.97@cid35.00 [205.00-1595.00]

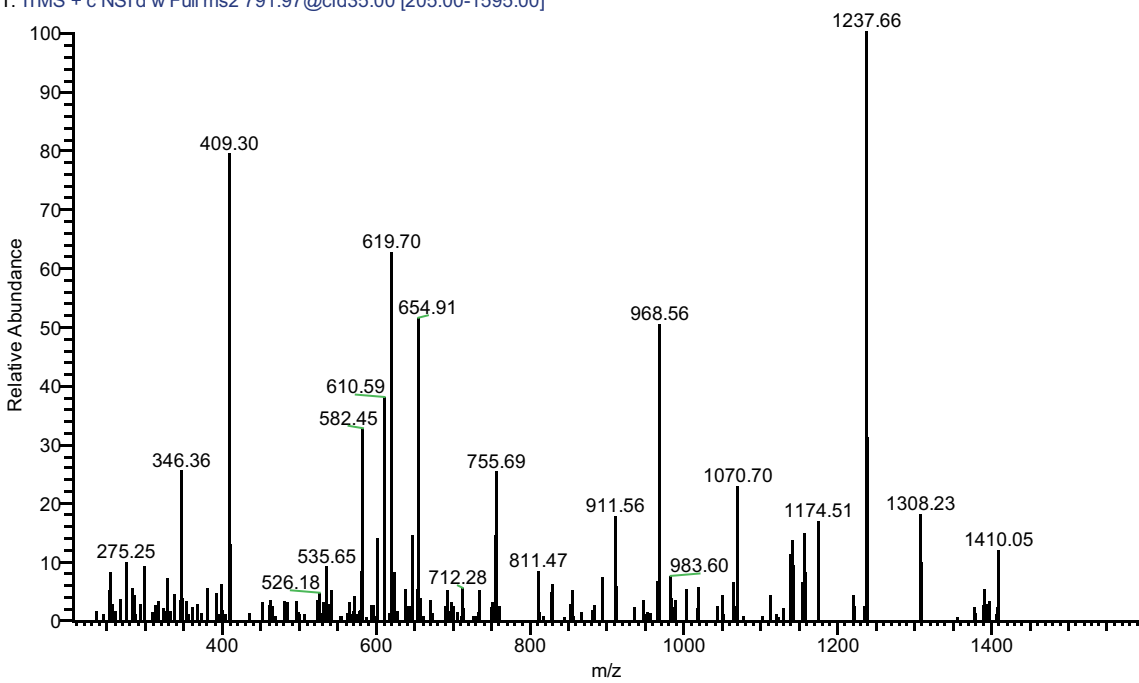



Match to Query 1870: 1581.928834 from(791.971693,2+)  
 1 cycles: 1 preclntensity: 2934398.2 FinneganScanNumber: 2470

(27-40) H3:  
 KSAPATGGVK(me1)KPHR

Monoisotopic mass of neutral peptide Mr(calc): 1581.9301

Variable modifications:

K1 : Acetyl:2H(3) (K) K11 : Acetyl:2H(3) (K)

K10 : Methyl+Acetyl:2H(3) (K)

Ions Score: 66 Expect: 5.7e-06

Matches : 25/138 fragment ions using 40 most intense peaks

| #  | b        | b <sup>++</sup> | b*       | b <sup>++</sup> * | b <sup>0</sup> | b <sup>0++</sup> | Seq. | y        | y <sup>++</sup> | y*       | y <sup>++</sup> * | y <sup>0</sup> | y <sup>0++</sup> | #  |
|----|----------|-----------------|----------|-------------------|----------------|------------------|------|----------|-----------------|----------|-------------------|----------------|------------------|----|
| 1  | 174.1316 | 87.5695         | 157.1051 | 79.0562           |                |                  | K    |          |                 |          |                   |                |                  | 14 |
| 2  | 261.1637 | 131.0855        | 244.1371 | 122.5722          | 243.1531       | 122.0802         | S    | 1409.813 | 705.4102        | 1392.787 | 696.8969          | 1391.803       | 696.4049         | 13 |
| 3  | 332.2008 | 166.604         | 315.1742 | 158.0908          | 314.1902       | 157.5987         | A    | 1322.781 | 661.8941        | 1305.755 | 653.3809          | 1304.77        | 652.8889         | 12 |
| 4  | 429.2535 | 215.1304        | 412.227  | 206.6171          | 411.243        | 206.1251         | P    | 1251.744 | 626.3756        | 1234.717 | 617.8623          | 1233.733       | 617.3703         | 11 |
| 5  | 500.2907 | 250.649         | 483.2641 | 242.1357          | 482.2801       | 241.6437         | A    | 1154.691 | 577.8492        | 1137.665 | 569.3359          | 1136.681       | 568.8439         | 10 |
| 6  | 601.3383 | 301.1728        | 584.3118 | 292.6595          | 583.3278       | 292.1675         | T    | 1083.654 | 542.3306        | 1066.628 | 533.8174          | 1065.643       | 533.3254         | 9  |
| 7  | 658.3598 | 329.6835        | 641.3332 | 321.1703          | 640.3492       | 320.6783         | G    | 982.6063 | 491.8068        | 965.5798 | 483.2935          |                |                  | 8  |
| 8  | 715.3813 | 358.1943        | 698.3547 | 349.681           | 697.3707       | 349.189          | G    | 925.5849 | 463.2961        | 908.5583 | 454.7828          |                |                  | 7  |
| 9  | 814.4497 | 407.7285        | 797.4231 | 399.2152          | 796.4391       | 398.7232         | V    | 868.5634 | 434.7853        | 851.5369 | 426.2721          |                |                  | 6  |
| 10 | 1001.59  | 501.2985        | 984.5631 | 492.7852          | 983.5791       | 492.2932         | K    | 769.495  | 385.2511        | 752.4684 | 376.7379          |                |                  | 5  |
| 11 | 1174.714 | 587.8607        | 1157.688 | 579.3474          | 1156.704       | 578.8554         | K    | 582.355  | 291.6811        | 565.3284 | 283.1679          |                |                  | 4  |
| 12 | 1271.767 | 636.387         | 1254.74  | 627.8738          | 1253.756       | 627.3818         | P    | 409.2306 | 205.119         | 392.2041 | 196.6057          |                |                  | 3  |
| 13 | 1408.826 | 704.9165        | 1391.799 | 696.4032          | 1390.815       | 695.9112         | H    | 312.1779 | 156.5926        | 295.1513 | 148.0793          |                |                  | 2  |
| 14 |          |                 |          |                   |                |                  | R    | 175.119  | 88.0631         | 158.0924 | 79.5498           |                |                  | 1  |

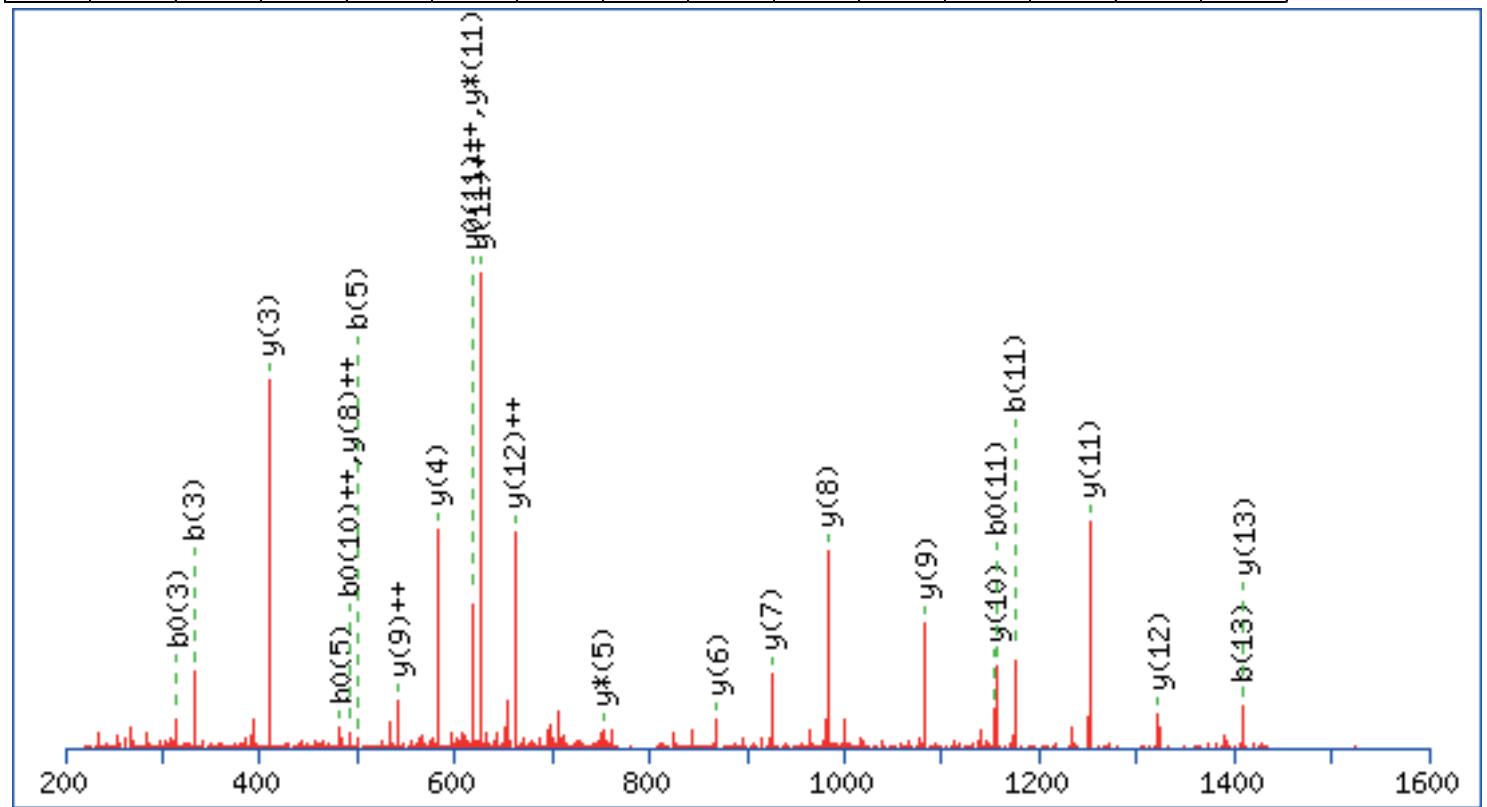

#2470 RT: 46.80  
 T: ITMS + c NSI d w Full ms2 791.97@cid35.00 [205.00-1595.00]

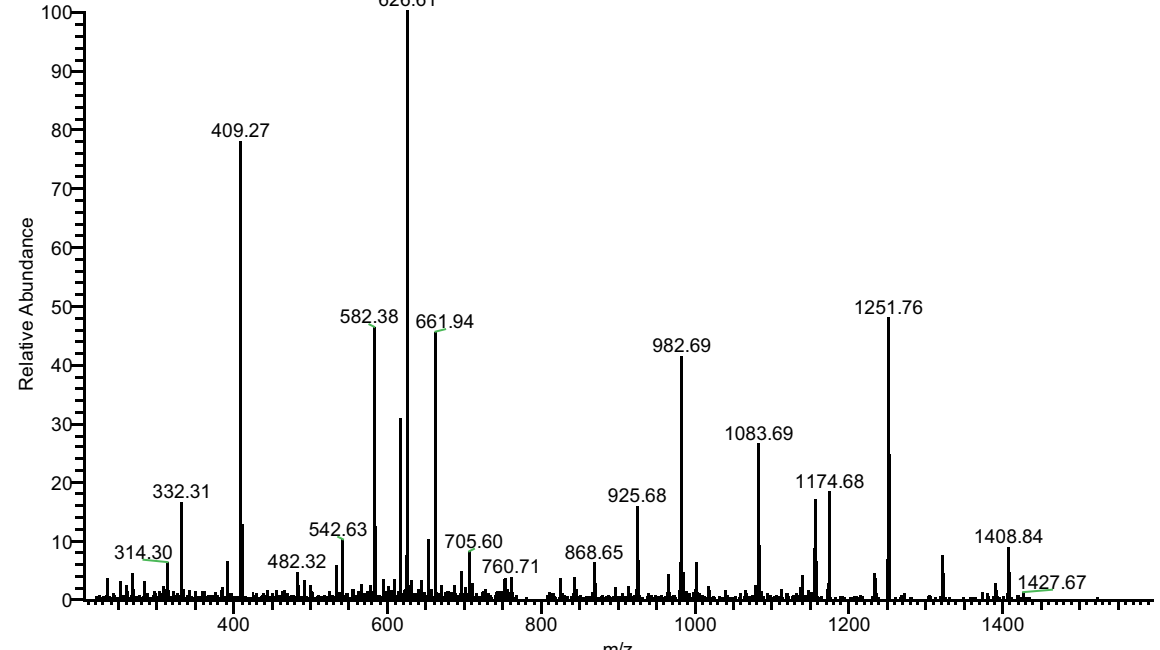

Match to Query 6698: 1550.920012 from(776.467282,2+)  
 1 cycles: 1 precIntensity: 6201700.9 FinneganScanNumber: 1995  
 Monoisotopic mass of neutral peptide Mr(calc): 1550.9163

(27-40) H3:  
 K(me2)SAPATGGVKKPHR

Variable modifications:

K1 : Dimethyl (K)                    K11 : Acetyl:2H(3) (K)

K10 : Acetyl:2H(3) (K)

Ions Score: 55 Expect: 9.2e-06

Matches : 27/138 fragment ions using 48 most intense peaks

| #  | b        | b <sup>++</sup> | b <sup>*</sup> | b <sup>***</sup> | b <sup>0</sup> | b <sup>++</sup> | Seq. | y        | y <sup>++</sup> | y <sup>*</sup> | y <sup>***</sup> | y <sup>0</sup> | y <sup>0++</sup> | #  |
|----|----------|-----------------|----------------|------------------|----------------|-----------------|------|----------|-----------------|----------------|------------------|----------------|------------------|----|
| 1  | 157.1335 | 79.0704         | 140.107        | 70.5571          |                |                 | K    |          |                 |                |                  |                |                  | 14 |
| 2  | 244.1656 | 122.5864        | 227.139        | 114.0731         | 226.155        | 113.5811        | S    | 1395.797 | 698.4023        | 1378.771       | 689.8891         | 1377.787       | 689.397          | 13 |
| 3  | 315.2027 | 158.105         | 298.1761       | 149.5917         | 297.1921       | 149.0997        | A    | 1308.765 | 654.8863        | 1291.739       | 646.373          | 1290.755       | 645.881          | 12 |
| 4  | 412.2554 | 206.6314        | 395.2289       | 198.1181         | 394.2449       | 197.6261        | P    | 1237.728 | 619.3678        | 1220.702       | 610.8545         | 1219.718       | 610.3625         | 11 |
| 5  | 483.2926 | 242.1499        | 466.266        | 233.6366         | 465.282        | 233.1446        | A    | 1140.676 | 570.8414        | 1123.649       | 562.3281         | 1122.665       | 561.8361         | 10 |
| 6  | 584.3402 | 292.6738        | 567.3137       | 284.1605         | 566.3297       | 283.6685        | T    | 1069.638 | 535.3228        | 1052.612       | 526.8095         | 1051.628       | 526.3175         | 9  |
| 7  | 641.3617 | 321.1845        | 624.3352       | 312.6712         | 623.3511       | 312.1792        | G    | 968.5907 | 484.799         | 951.5641       | 476.2857         |                |                  | 8  |
| 8  | 698.3832 | 349.6952        | 681.3566       | 341.1819         | 680.3726       | 340.6899        | G    | 911.5692 | 456.2882        | 894.5427       | 447.775          |                |                  | 7  |
| 9  | 797.4516 | 399.2294        | 780.425        | 390.7162         | 779.441        | 390.2241        | V    | 854.5478 | 427.7775        | 837.5212       | 419.2642         |                |                  | 6  |
| 10 | 970.5759 | 485.7916        | 953.5494       | 477.2783         | 952.5654       | 476.7863        | K    | 755.4793 | 378.2433        | 738.4528       | 369.73           |                |                  | 5  |
| 11 | 1143.7   | 572.3538        | 1126.674       | 563.8405         | 1125.69        | 563.3485        | K    | 582.355  | 291.6811        | 565.3284       | 283.1679         |                |                  | 4  |
| 12 | 1240.753 | 620.8802        | 1223.727       | 612.3669         | 1222.743       | 611.8749        | P    | 409.2306 | 205.119         | 392.2041       | 196.6057         |                |                  | 3  |
| 13 | 1377.812 | 689.4096        | 1360.785       | 680.8963         | 1359.801       | 680.4043        | H    | 312.1779 | 156.5926        | 295.1513       | 148.0793         |                |                  | 2  |
| 14 |          |                 |                |                  |                |                 | R    | 175.119  | 88.0631         | 158.0924       | 79.5498          |                |                  | 1  |

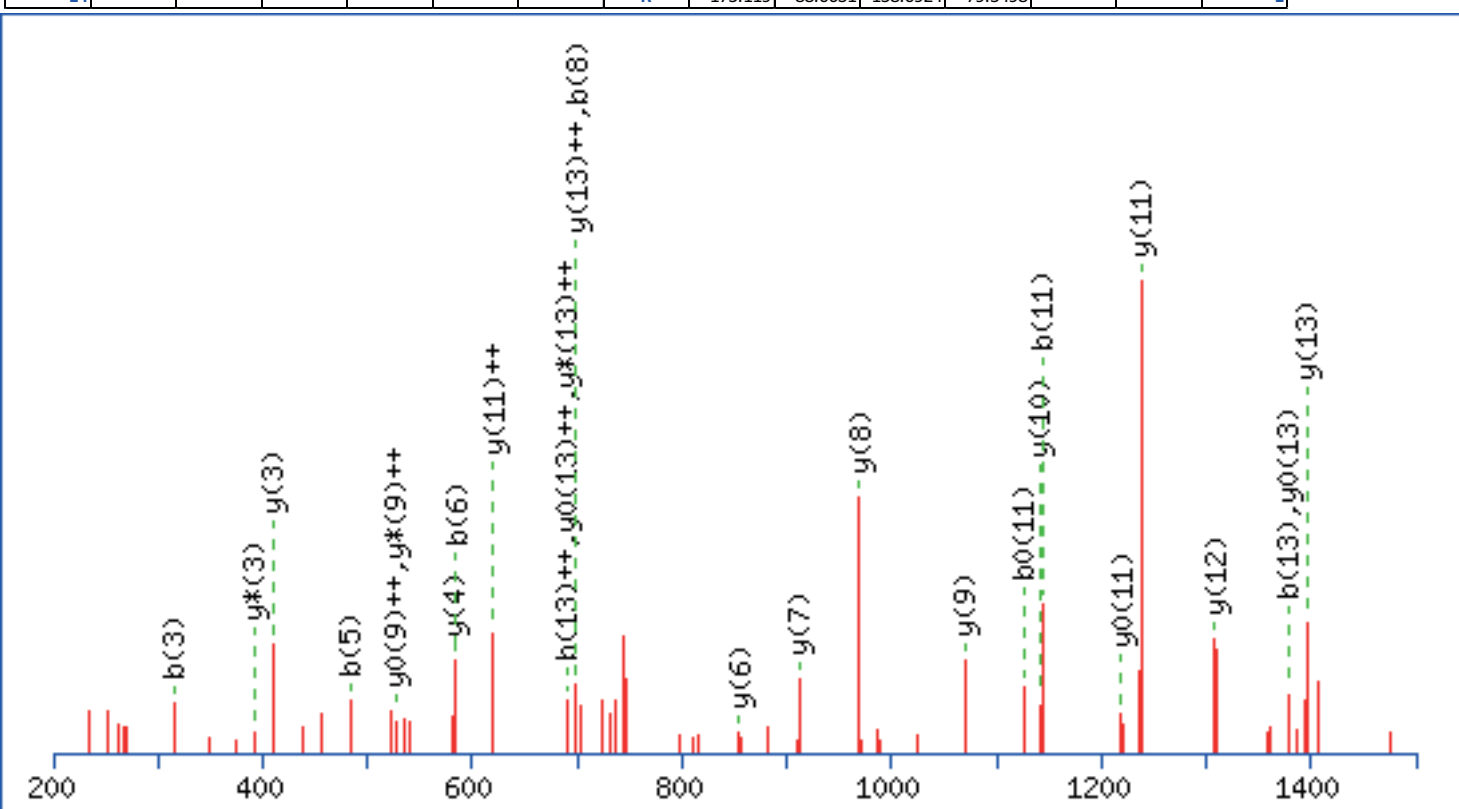

#1995 RT: 36.91  
 T: ITMS + c NSI d w Full ms2 776.47@cid35.00 [200.00-1565.00]

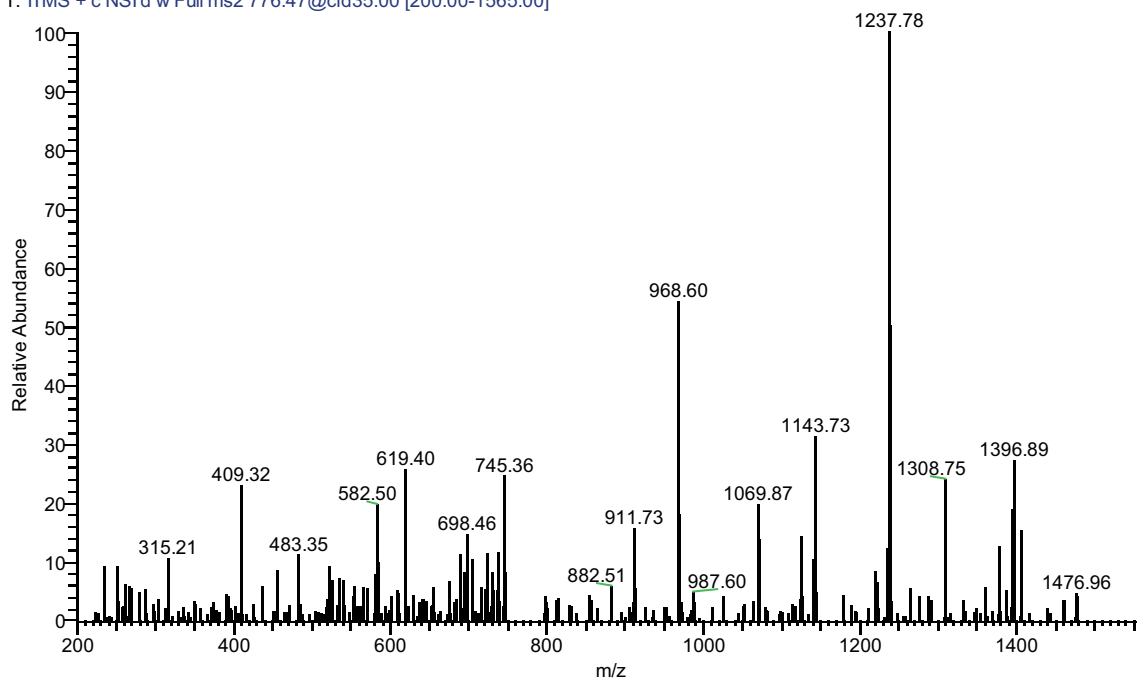

Match to Query 4746: 1550.915270 from(776.464911,2+)  
 1 cycles: 1 preIntensity: 418128.8 FinneganScanNumber: 2088  
 Monoisotopic mass of neutral peptide Mr(calc): 1550.9163

(27-40) H3:  
 KSAPATGGVK(me2)KPHR

Variable modifications:

K1 : Acetyl:2H(3) (K) K11 : Acetyl:2H(3) (K)

K10 : Dimethyl (K)

Ions Score: 76 Expect: 1.1e-06

Matches : 36/138 fragment ions using 52 most intense peaks

| #  | b               | b <sup>++</sup> | b <sup>*</sup>  | b <sup>+++</sup> | b <sup>0</sup>  | b <sup>0++</sup> | Seq. | y               | y <sup>++</sup> | y <sup>*</sup> | y <sup>+++</sup> | y <sup>0</sup> | y <sup>0++</sup> | #  |
|----|-----------------|-----------------|-----------------|------------------|-----------------|------------------|------|-----------------|-----------------|----------------|------------------|----------------|------------------|----|
| 1  | 174.1316        | 87.5695         | 157.1051        | 79.0562          |                 |                  | K    |                 |                 |                |                  |                |                  | 14 |
| 2  | 261.1637        | 131.0855        | 244.1371        | 122.5722         | 243.1531        | 122.0802         | S    | 1378.799        | 689.9033        | 1361.773       | 681.39           | 1360.789       | 680.898          | 13 |
| 3  | <b>332.2008</b> | 166.604         | 315.1742        | 158.0908         | <b>314.1902</b> | 157.5987         | A    | <b>1291.767</b> | <b>646.3873</b> | 1274.741       | <b>637.874</b>   | 1273.757       | <b>637.382</b>   | 12 |
| 4  | 429.2535        | 215.1304        | 412.227         | 206.6171         | <b>411.243</b>  | 206.1251         | P    | <b>1220.73</b>  | <b>610.8687</b> | 1203.704       | 602.3554         | 1202.72        | <b>601.8634</b>  | 11 |
| 5  | 500.2907        | 250.649         | 483.2641        | 242.1357         | <b>482.2801</b> | 241.6437         | A    | <b>1123.677</b> | 562.3423        | 1106.651       | 553.8291         | 1105.667       | 553.337          | 10 |
| 6  | <b>601.3383</b> | 301.1728        | 584.3118        | 292.6595         | 583.3278        | 292.1675         | T    | <b>1052.64</b>  | <b>526.8238</b> | 1035.614       | 518.3105         | 1034.63        | 517.8185         | 9  |
| 7  | 658.3598        | 329.6835        | 641.3332        | 321.1703         | 640.3492        | 320.6783         | G    | <b>951.5926</b> | <b>476.2999</b> | 934.566        | 467.7867         |                |                  | 8  |
| 8  | 715.3813        | 358.1943        | 698.3547        | 349.681          | 697.3707        | 349.189          | G    | <b>894.5711</b> | 447.7892        | 877.5446       | 439.2759         |                |                  | 7  |
| 9  | 814.4497        | 407.7285        | 797.4231        | 399.2152         | 796.4391        | 398.7232         | V    | <b>837.5497</b> | 419.2785        | 820.5231       | 410.7652         |                |                  | 6  |
| 10 | <b>970.5759</b> | 485.7916        | 953.5494        | <b>477.2783</b>  | <b>952.5654</b> | <b>476.7863</b>  | K    | <b>738.4812</b> | 369.7443        | 721.4547       | 361.231          |                |                  | 5  |
| 11 | <b>1143.7</b>   | 572.3538        | 1126.674        | 563.8405         | 1125.69         | 563.3485         | K    | <b>582.355</b>  | 291.6811        | 565.3284       | 283.1679         |                |                  | 4  |
| 12 | 1240.753        | 620.8802        | 1223.727        | 612.3669         | 1222.743        | 611.8749         | P    | <b>409.2306</b> | 205.119         | 392.2041       | 196.6057         |                |                  | 3  |
| 13 | <b>1377.812</b> | <b>689.4096</b> | <b>1360.785</b> | <b>680.8963</b>  | 1359.801        | 680.4043         | H    | <b>312.1779</b> | 156.5926        | 295.1513       | 148.0793         |                |                  | 2  |
| 14 |                 |                 |                 |                  |                 |                  | R    | 175.119         | 88.0631         | 158.0924       | 79.5498          |                |                  | 1  |

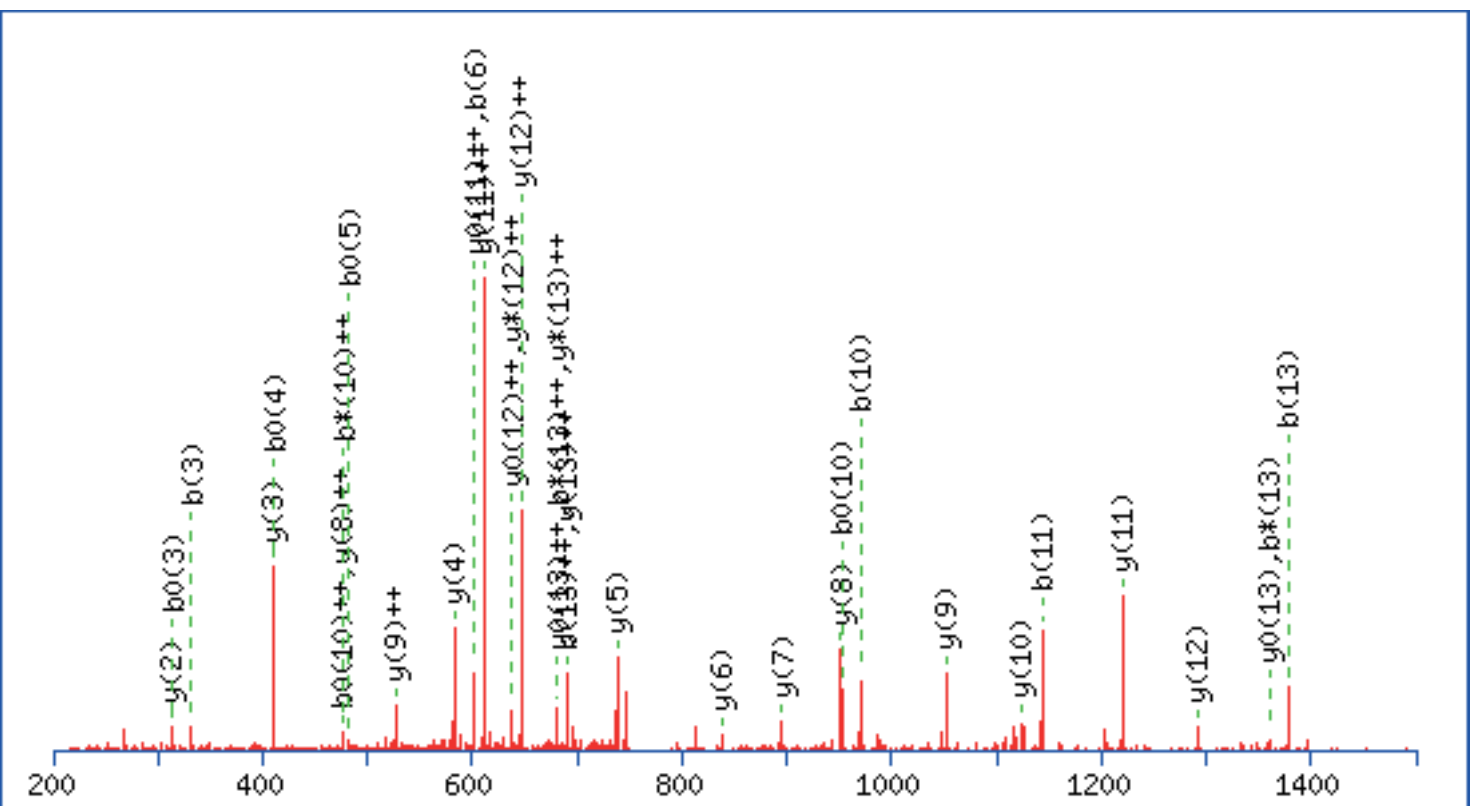

#2088 RT: 41.58  
 T: ITMS + c NSI d w Full ms2 776.47@cid35.00 [200.00-1565.00]

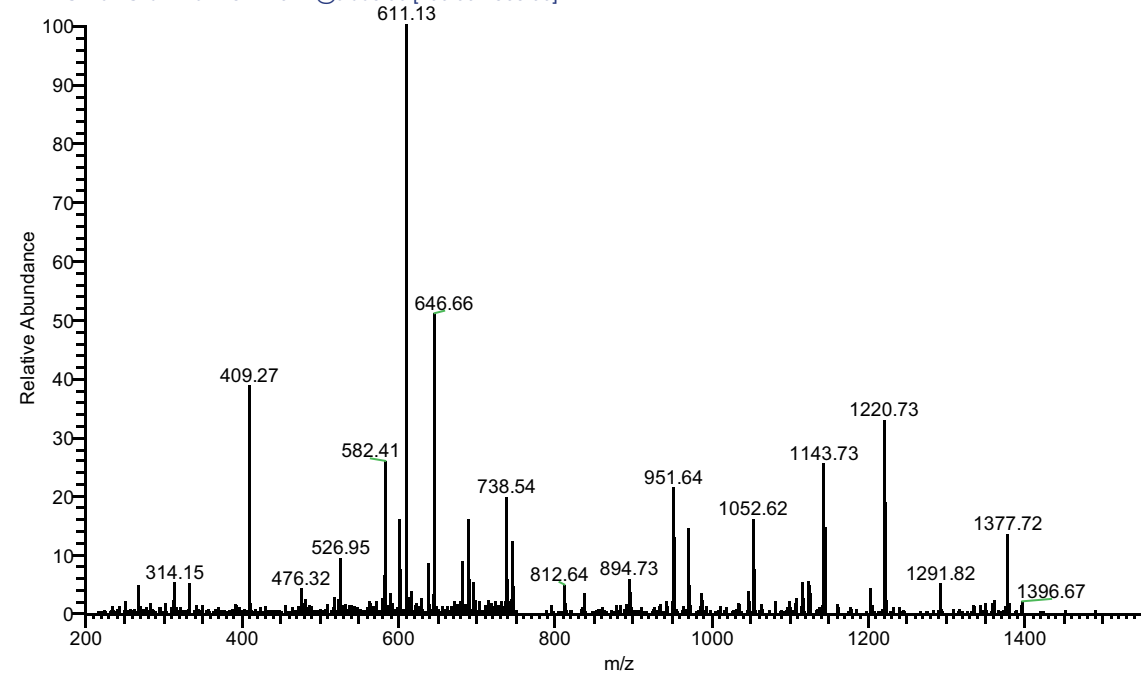

Match to Query 1564.9320 from (783.476481,2+)  
 1 cycles: 1 precIntensity: 1630580.3 FinneganScanNumber: 1919  
 Monoisotopic mass of neutral peptide Mr(calc): 1564.9320

(27-40) H3:  
 K(me3)SAPATGGVKKPHR

Variable modifications:

K1 : Trimethyl (K)  
 K10 : Acetyl:2H(3) (K)  
 K11 : Acetyl:2H(3) (K)

Ions Score: 45 Expect: 0.00015

Matches : 29/138 fragment ions using 52 most intense peaks

| #  | b        | b <sup>++</sup> | b <sup>*</sup> | b <sup>***</sup> | b <sup>0</sup> | b <sup>0++</sup> | Seq. | y        | y <sup>++</sup> | y <sup>*</sup> | y <sup>***</sup> | y <sup>0</sup> | y <sup>0++</sup> | #  |
|----|----------|-----------------|----------------|------------------|----------------|------------------|------|----------|-----------------|----------------|------------------|----------------|------------------|----|
| 1  | 171.1492 | 86.0782         | 154.1226       | 77.565           |                |                  | K    |          |                 |                |                  |                |                  | 14 |
| 2  | 258.1812 | 129.5942        | 241.1547       | 121.081          | 240.1707       | 120.589          | S    | 1395.797 | 698.4023        | 1378.771       | 689.8891         | 1377.787       | 689.397          | 13 |
| 3  | 329.2183 | 165.1128        | 312.1918       | 156.5995         | 311.2078       | 156.1075         | A    | 1308.765 | 654.8863        | 1291.739       | 646.373          | 1290.755       | 645.881          | 12 |
| 4  | 426.2711 | 213.6392        | 409.2445       | 205.1259         | 408.2605       | 204.6339         | P    | 1237.728 | 619.3678        | 1220.702       | 610.8545         | 1219.718       | 610.3625         | 11 |
| 5  | 497.3082 | 249.1577        | 480.2817       | 240.6445         | 479.2976       | 240.1525         | A    | 1140.676 | 570.8414        | 1123.649       | 562.3281         | 1122.665       | 561.8361         | 10 |
| 6  | 598.3559 | 299.6816        | 581.3293       | 291.1683         | 580.3453       | 290.6763         | T    | 1069.638 | 535.3228        | 1052.612       | 526.8095         | 1051.628       | 526.3175         | 9  |
| 7  | 655.3774 | 328.1923        | 638.3508       | 319.679          | 637.3668       | 319.187          | G    | 968.5907 | 484.799         | 951.5641       | 476.2857         |                |                  | 8  |
| 8  | 712.3988 | 356.703         | 695.3723       | 348.1898         | 694.3883       | 347.6978         | G    | 911.5692 | 456.2882        | 894.5427       | 447.775          |                |                  | 7  |
| 9  | 811.4672 | 406.2373        | 794.4407       | 397.724          | 793.4567       | 397.232          | V    | 854.5478 | 427.7775        | 837.5212       | 419.2642         |                |                  | 6  |
| 10 | 984.5916 | 492.7994        | 967.565        | 484.2862         | 966.581        | 483.7941         | K    | 755.4793 | 378.2433        | 738.4528       | 369.73           |                |                  | 5  |
| 11 | 1157.716 | 579.3616        | 1140.689       | 570.8483         | 1139.705       | 570.3563         | K    | 582.355  | 291.6811        | 565.3284       | 283.1679         |                |                  | 4  |
| 12 | 1254.769 | 627.888         | 1237.742       | 619.3747         | 1236.758       | 618.8827         | P    | 409.2306 | 205.119         | 392.2041       | 196.6057         |                |                  | 3  |
| 13 | 1391.828 | 696.4174        | 1374.801       | 687.9042         | 1373.817       | 687.4122         | H    | 312.1779 | 156.5926        | 295.1513       | 148.0793         |                |                  | 2  |
| 14 |          |                 |                |                  |                |                  | R    | 175.119  | 88.0631         | 158.0924       | 79.5498          |                |                  | 1  |

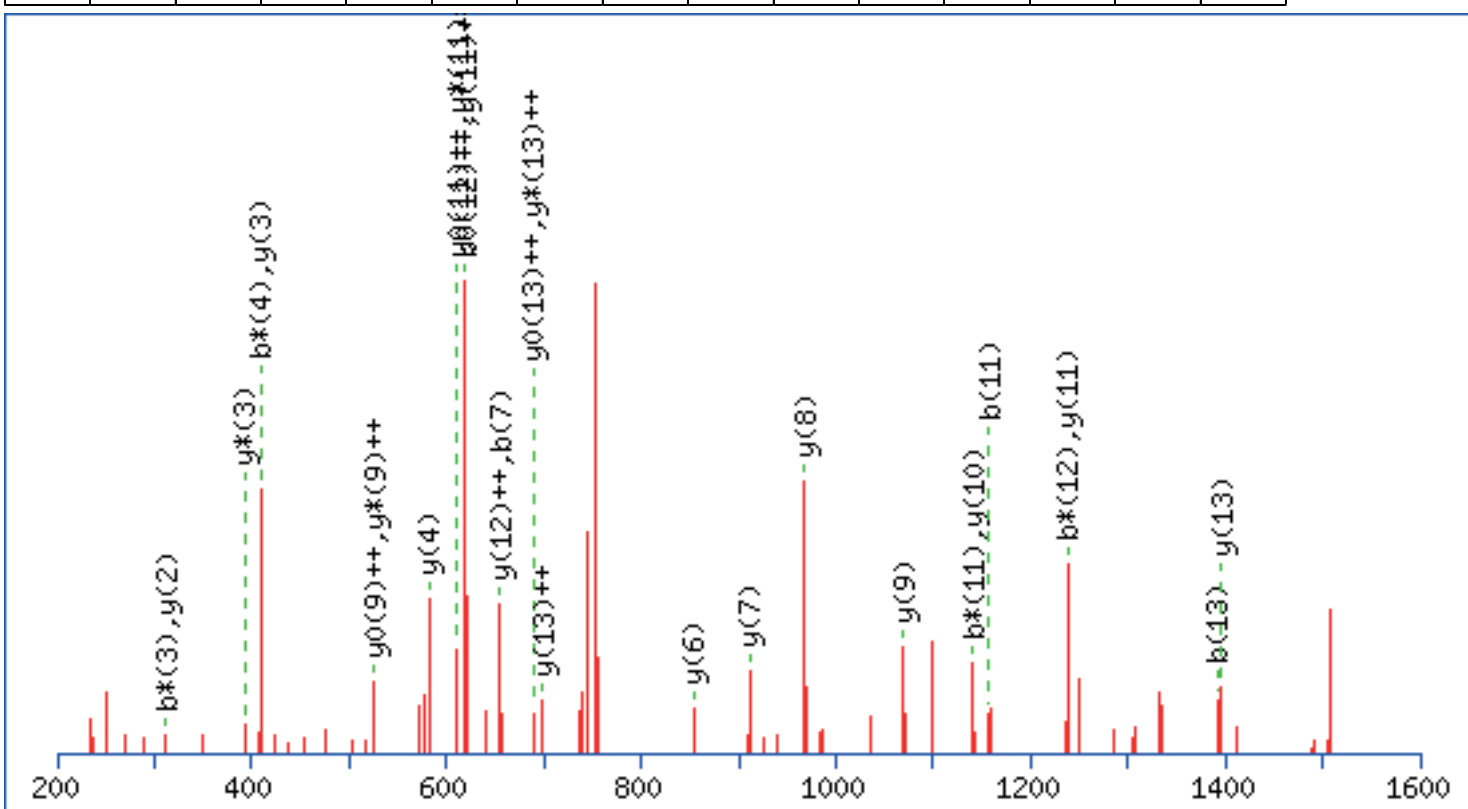

#1919 RT: 36.26  
 T: ITMS + c NSI d w Full ms2 783.47@cid35.00 [205.00-1580.00]

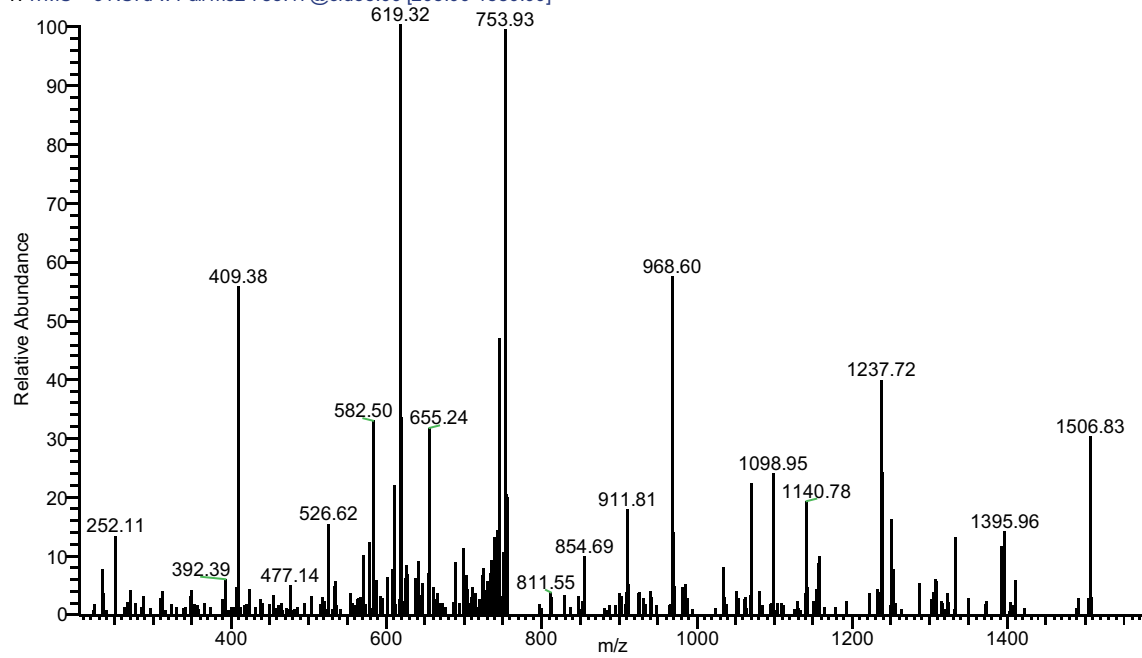

Match to Query 1564.9320 from (783.476013,2+)  
 1 cycles: 1 precIntensity: 1812948.0 FinneganScanNumber: 2129  
 Monoisotopic mass of neutral peptide Mr(calc): 1564.9320

(27-40) H3:  
 K(me2)SAPATGGVK(me1)KPHR

Variable modifications:

K1 : Dimethyl (K)  
 K10 : Methyl+Acetyl:2H(3) (K)  
 K11 : Acetyl:2H(3) (K)

Ions Score: 34 Expect: 0.0015

Matches : 29/138 fragment ions using 69 most intense peaks

| #  | b        | b <sup>++</sup> | b <sup>*</sup> | b <sup>***</sup> | b <sup>0</sup> | b <sup>0++</sup> | Seq. | y        | y <sup>++</sup> | y <sup>*</sup> | y <sup>***</sup> | y <sup>0</sup> | y <sup>0++</sup> | #  |
|----|----------|-----------------|----------------|------------------|----------------|------------------|------|----------|-----------------|----------------|------------------|----------------|------------------|----|
| 1  | 157.1335 | 79.0704         | 140.107        | 70.5571          |                |                  | K    |          |                 |                |                  |                |                  | 14 |
| 2  | 244.1656 | 122.5864        | 227.139        | 114.0731         | 226.155        | 113.5811         | S    | 1409.813 | 705.4102        | 1392.787       | 696.8969         | 1391.803       | 696.4049         | 13 |
| 3  | 315.2027 | 158.105         | 298.1761       | 149.5917         | 297.1921       | 149.0997         | A    | 1322.781 | 661.8941        | 1305.755       | 653.3809         | 1304.77        | 652.8889         | 12 |
| 4  | 412.2554 | 206.6314        | 395.2289       | 198.1181         | 394.2449       | 197.6261         | P    | 1251.744 | 626.3756        | 1234.717       | 617.8623         | 1233.733       | 617.3703         | 11 |
| 5  | 483.2926 | 242.1499        | 466.266        | 233.6366         | 465.282        | 233.1446         | A    | 1154.691 | 577.8492        | 1137.665       | 569.3359         | 1136.681       | 568.8439         | 10 |
| 6  | 584.3402 | 292.6738        | 567.3137       | 284.1605         | 566.3297       | 283.6685         | T    | 1083.654 | 542.3306        | 1066.628       | 533.8174         | 1065.644       | 533.3254         | 9  |
| 7  | 641.3617 | 321.1845        | 624.3352       | 312.6712         | 623.3511       | 312.1792         | G    | 982.6063 | 491.8068        | 965.5798       | 483.2935         |                |                  | 8  |
| 8  | 698.3832 | 349.6952        | 681.3566       | 341.1819         | 680.3726       | 340.6899         | G    | 925.5849 | 463.2961        | 908.5583       | 454.7828         |                |                  | 7  |
| 9  | 797.4516 | 399.2294        | 780.425        | 390.7162         | 779.441        | 390.2241         | V    | 868.5634 | 434.7853        | 851.5369       | 426.2721         |                |                  | 6  |
| 10 | 984.5916 | 492.7994        | 967.565        | 484.2862         | 966.581        | 483.7941         | K    | 769.495  | 385.2511        | 752.4684       | 376.7379         |                |                  | 5  |
| 11 | 1157.716 | 579.3616        | 1140.689       | 570.8483         | 1139.705       | 570.3563         | K    | 582.355  | 291.6811        | 565.3284       | 283.1679         |                |                  | 4  |
| 12 | 1254.769 | 627.888         | 1237.742       | 619.3747         | 1236.758       | 618.8827         | P    | 409.2306 | 205.119         | 392.2041       | 196.6057         |                |                  | 3  |
| 13 | 1391.828 | 696.4174        | 1374.801       | 687.9042         | 1373.817       | 687.4122         | H    | 312.1779 | 156.5926        | 295.1513       | 148.0793         |                |                  | 2  |
| 14 |          |                 |                |                  |                |                  | R    | 175.119  | 88.0631         | 158.0924       | 79.5498          |                |                  | 1  |

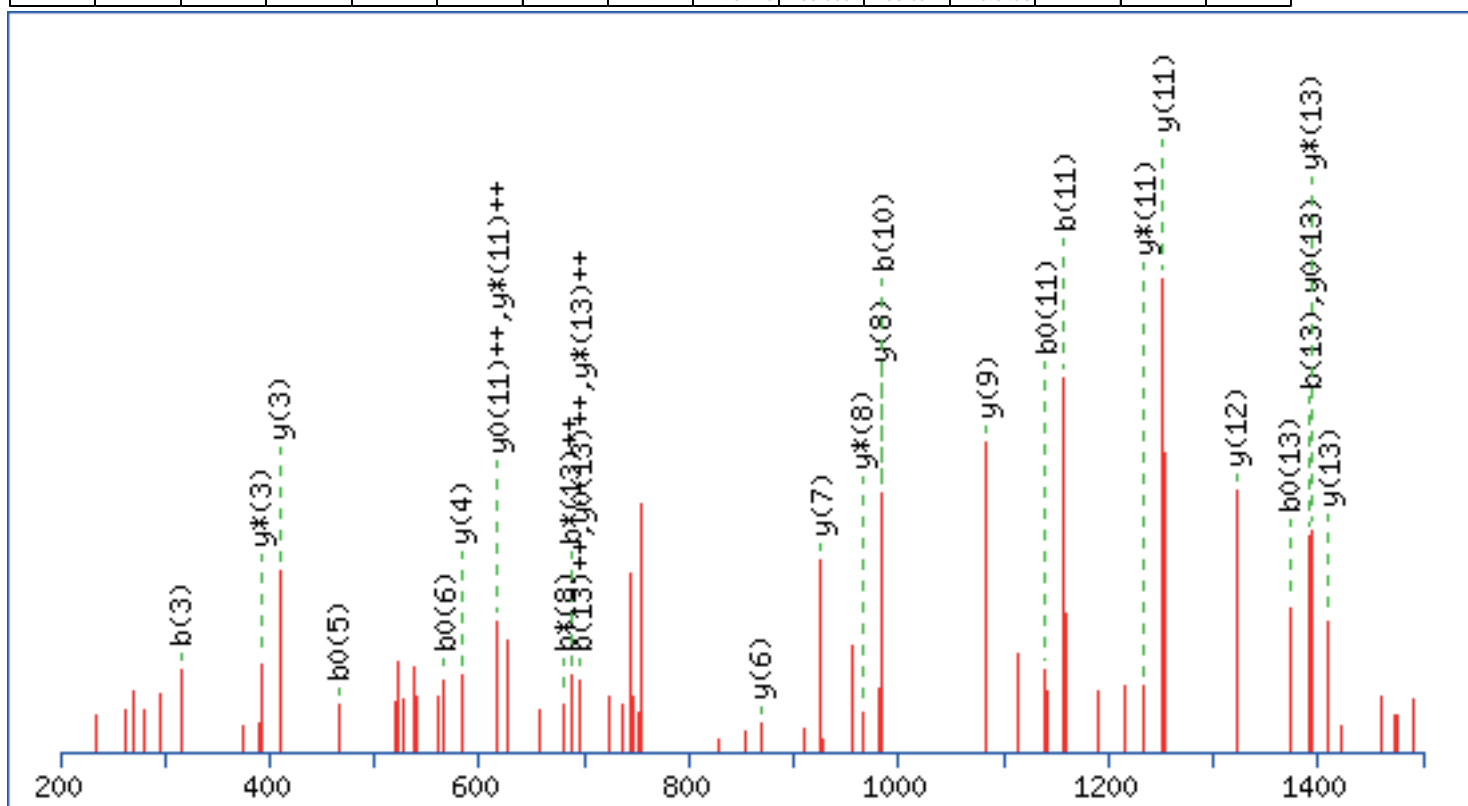

#2129 RT: 38.08  
 T: ITMS + c NSI d w Full ms2 783.48@cid35.00 [205.00-1580.00]

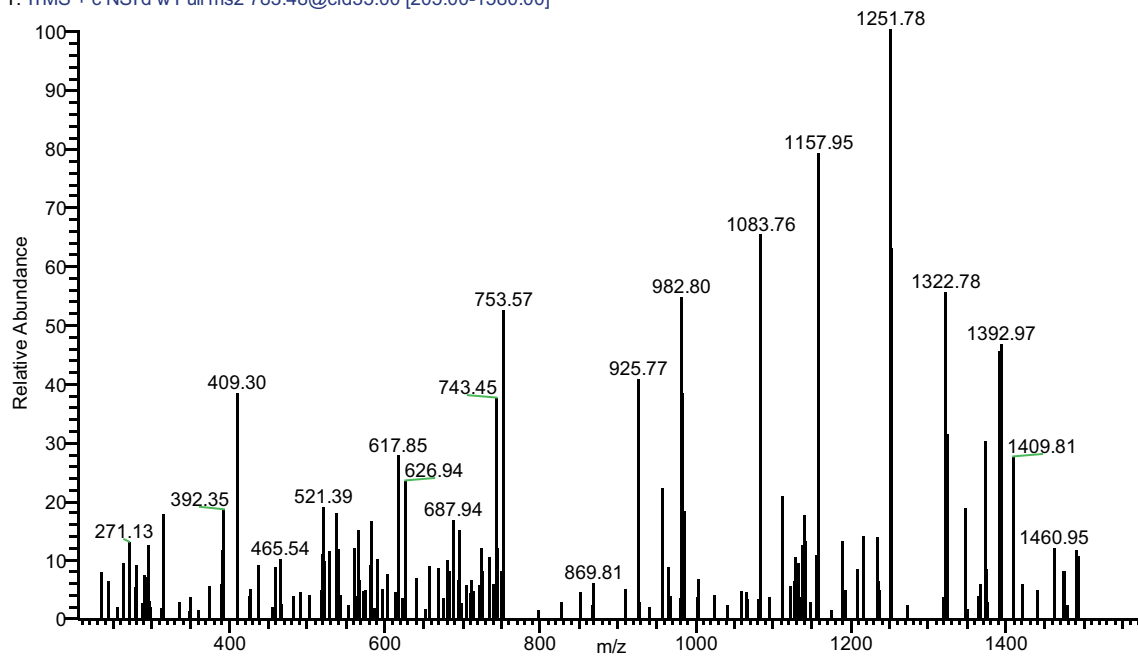

Match to Query 4801: 1564.93312 from (783.474232,2+)  
 1 cycles: 1 precIntensity: 93701.7 FinneganScanNumber: 2258  
 Monoisotopic mass of neutral peptide Mr(calc): 1564.9320

(27-40) H3:  
 K(me1)SAPATGGVK(me2)KPHR

Variable modifications:

K1 : Methyl+Acetyl:2H(3) (K)

K10 : Dimethyl (K)

K11 : Acetyl:2H(3) (K)

Ions Score: 75 Expect: 1.4e-06

Matches : 19/138 fragment ions using 24 most intense peaks

| #  | b        | b <sup>++</sup> | b <sup>*</sup> | b <sup>***</sup> | b <sup>0</sup> | b <sup>0++</sup> | Seq. | y        | y <sup>++</sup> | y <sup>*</sup> | y <sup>***</sup> | y <sup>0</sup> | y <sup>0++</sup> | #  |
|----|----------|-----------------|----------------|------------------|----------------|------------------|------|----------|-----------------|----------------|------------------|----------------|------------------|----|
| 1  | 188.1473 | 94.5773         | 171.1207       | 86.064           |                |                  | K    |          |                 |                |                  |                |                  | 14 |
| 2  | 275.1793 | 138.0933        | 258.1528       | 129.58           | 257.1687       | 129.088          | S    | 1378.799 | 689.9033        | 1361.773       | 681.39           | 1360.789       | 680.898          | 13 |
| 3  | 346.2164 | 173.6119        | 329.1899       | 165.0986         | 328.2059       | 164.6066         | A    | 1291.767 | 646.3873        | 1274.741       | 637.874          | 1273.757       | 637.382          | 12 |
| 4  | 443.2692 | 222.1382        | 426.2426       | 213.625          | 425.2586       | 213.133          | P    | 1220.73  | 610.8687        | 1203.704       | 602.3554         | 1202.72        | 601.8634         | 11 |
| 5  | 514.3063 | 257.6568        | 497.2798       | 249.1435         | 496.2957       | 248.6515         | A    | 1123.677 | 562.3423        | 1106.651       | 553.8291         | 1105.667       | 553.337          | 10 |
| 6  | 615.354  | 308.1806        | 598.3274       | 299.6674         | 597.3434       | 299.1753         | T    | 1052.64  | 526.8238        | 1035.614       | 518.3105         | 1034.63        | 517.8185         | 9  |
| 7  | 672.3754 | 336.6914        | 655.3489       | 328.1781         | 654.3649       | 327.6861         | G    | 951.5926 | 476.2999        | 934.566        | 467.7867         |                |                  | 8  |
| 8  | 729.3969 | 365.2021        | 712.3704       | 356.6888         | 711.3863       | 356.1968         | G    | 894.5711 | 447.7892        | 877.5446       | 439.2759         |                |                  | 7  |
| 9  | 828.4653 | 414.7363        | 811.4388       | 406.223          | 810.4548       | 405.731          | V    | 837.5497 | 419.2785        | 820.5231       | 410.7652         |                |                  | 6  |
| 10 | 984.5916 | 492.7994        | 967.565        | 484.2862         | 966.581        | 483.7941         | K    | 738.4812 | 369.7443        | 721.4547       | 361.231          |                |                  | 5  |
| 11 | 1157.716 | 579.3616        | 1140.689       | 570.8483         | 1139.705       | 570.3563         | K    | 582.355  | 291.6811        | 565.3284       | 283.1679         |                |                  | 4  |
| 12 | 1254.769 | 627.888         | 1237.742       | 619.3747         | 1236.758       | 618.8827         | P    | 409.2306 | 205.119         | 392.2041       | 196.6057         |                |                  | 3  |
| 13 | 1391.828 | 696.4174        | 1374.801       | 687.9042         | 1373.817       | 687.4122         | H    | 312.1779 | 156.5926        | 295.1513       | 148.0793         |                |                  | 2  |
| 14 |          |                 |                |                  |                |                  | R    | 175.119  | 88.0631         | 158.0924       | 79.5498          |                |                  | 1  |

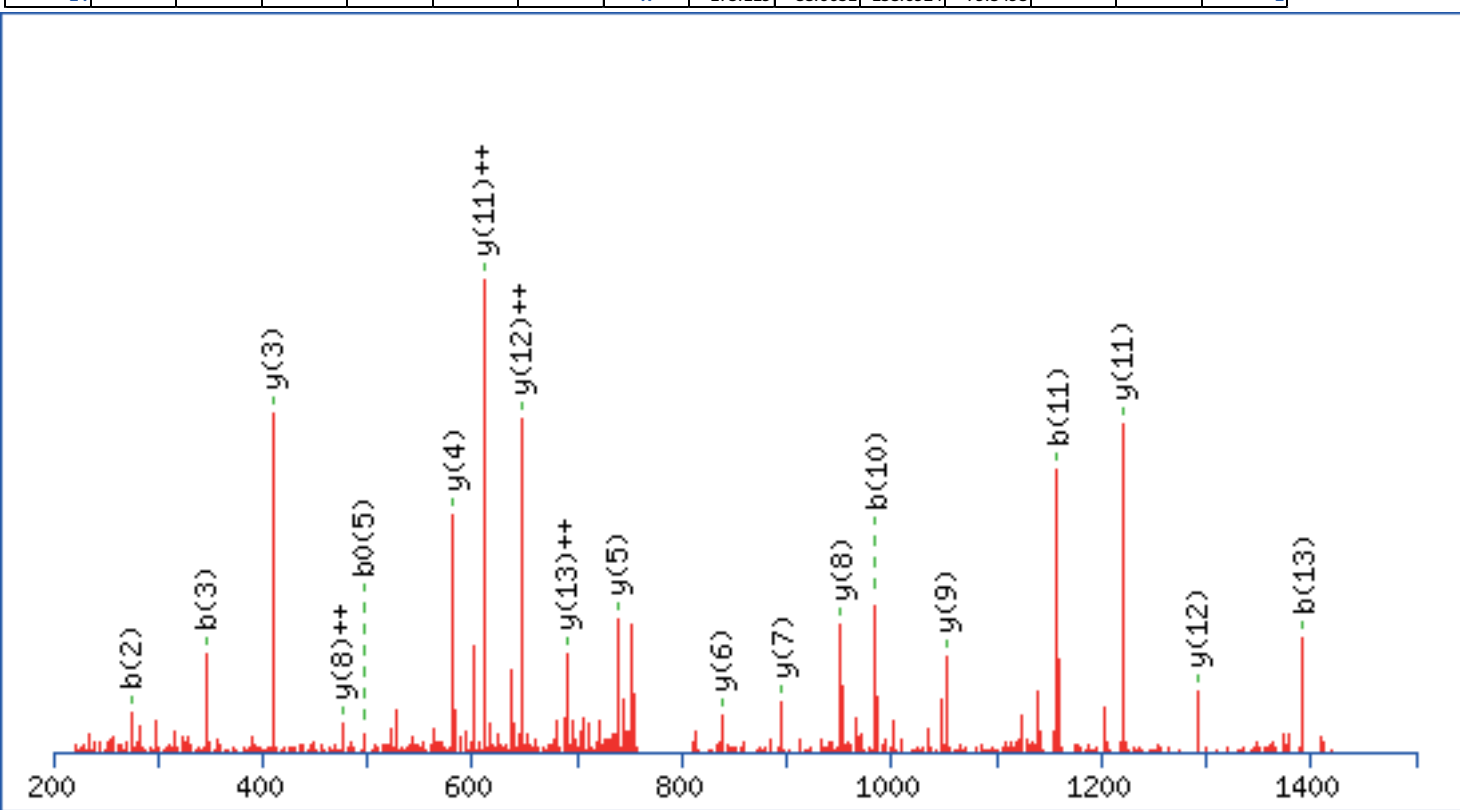

#2258 RT: 43.94  
 T: ITMS + c NSI d w Full ms2 783.47@cid35.00 [205.00-1580.00]

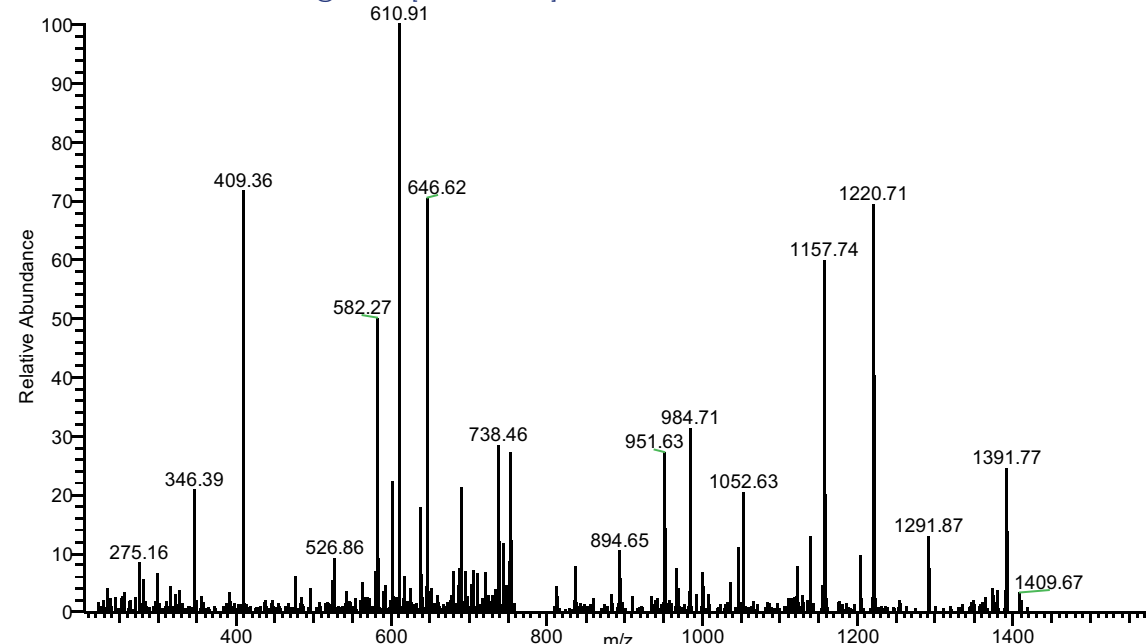

Match to Query 1595: 1595.947628 from(798.981090,2+)  
 1 cycles: 1 preIntensity: 1192017.5 FinneganScanNumber: 3454  
 Monoisotopic mass of neutral peptide Mr(calc): 1595.9457

(27-40) H3:  
**K(me1)SAPATGGVK(me1)KPHR**

Variable modifications:

- K1 : Methyl+Acetyl:2H(3) (K)
- K10 : Methyl+Acetyl:2H(3) (K)
- K11 : Acetyl:2H(3) (K)

Ions Score: 70 Expect: 7e-07

Matches : 26/138 fragment ions using 36 most intense peaks

| #  | b               | b <sup>++</sup> | b <sup>*</sup>  | b <sup>***</sup> | b <sup>0</sup>  | b <sup>0**</sup> | Seq. | γ               | γ <sup>++</sup> | γ <sup>*</sup> | γ <sup>***</sup> | γ <sup>0</sup> | γ <sup>0**</sup> | #  |
|----|-----------------|-----------------|-----------------|------------------|-----------------|------------------|------|-----------------|-----------------|----------------|------------------|----------------|------------------|----|
| 1  | 188.1473        | 94.5773         | 171.1207        | 86.064           |                 |                  | K    |                 |                 |                |                  |                |                  | 14 |
| 2  | <b>275.1793</b> | 138.0933        | 258.1528        | 129.58           | 257.1687        | 129.088          | S    | <b>1409.813</b> | 705.4102        | 1392.787       | 696.8969         | 1391.803       | 696.4049         | 13 |
| 3  | <b>346.2164</b> | 173.6119        | 329.1899        | 165.0986         | <b>328.2059</b> | 164.6066         | A    | <b>1322.781</b> | <b>661.8941</b> | 1305.755       | <b>653.3809</b>  | 1304.77        | <b>652.8889</b>  | 12 |
| 4  | 443.2692        | 222.1382        | 426.2426        | 213.625          | 425.2586        | 213.133          | P    | <b>1251.744</b> | <b>626.3756</b> | 1234.717       | <b>617.8623</b>  | 1233.733       | <b>617.3703</b>  | 11 |
| 5  | 514.3063        | 257.6568        | 497.2798        | 249.1435         | 496.2957        | 248.6515         | A    | 1154.691        | 577.8492        | 1137.665       | 569.3359         | 1136.681       | 568.8439         | 10 |
| 6  | 615.354         | 308.1806        | 598.3274        | 299.6674         | 597.3434        | 299.1753         | T    | <b>1083.654</b> | 542.3306        | 1066.628       | 533.8174         | 1065.644       | 533.3254         | 9  |
| 7  | 672.3754        | 336.6914        | 655.3489        | <b>328.1781</b>  | 654.3649        | 327.6861         | G    | <b>982.6063</b> | 491.8068        | 965.5798       | 483.2935         |                |                  | 8  |
| 8  | 729.3969        | 365.2021        | 712.3704        | 356.6888         | 711.3863        | 356.1968         | G    | <b>925.5849</b> | 463.2961        | 908.5583       | <b>454.7828</b>  |                |                  | 7  |
| 9  | 828.4653        | 414.7363        | 811.4388        | 406.223          | 810.4548        | 405.731          | V    | <b>868.5634</b> | 434.7853        | 851.5369       | 426.2721         |                |                  | 6  |
| 10 | 1015.605        | <b>508.3063</b> | 998.5788        | 499.793          | 997.5948        | 499.301          | K    | <b>769.495</b>  | 385.2511        | 752.4684       | 376.7379         |                |                  | 5  |
| 11 | <b>1188.73</b>  | 594.8685        | <b>1171.703</b> | 586.3552         | <b>1170.719</b> | 585.8632         | K    | <b>582.355</b>  | 291.6811        | 565.3284       | 283.1679         |                |                  | 4  |
| 12 | 1285.783        | 643.3949        | 1268.756        | 634.8816         | 1267.772        | 634.3896         | P    | <b>409.2306</b> | 205.119         | 392.2041       | 196.6057         |                |                  | 3  |
| 13 | <b>1422.841</b> | 711.9243        | 1405.815        | 703.411          | 1404.831        | 702.919          | H    | 312.1779        | 156.5926        | 295.1513       | 148.0793         |                |                  | 2  |
| 14 |                 |                 |                 |                  |                 |                  | R    | 175.119         | 88.0631         | 158.0924       | 79.5498          |                |                  | 1  |

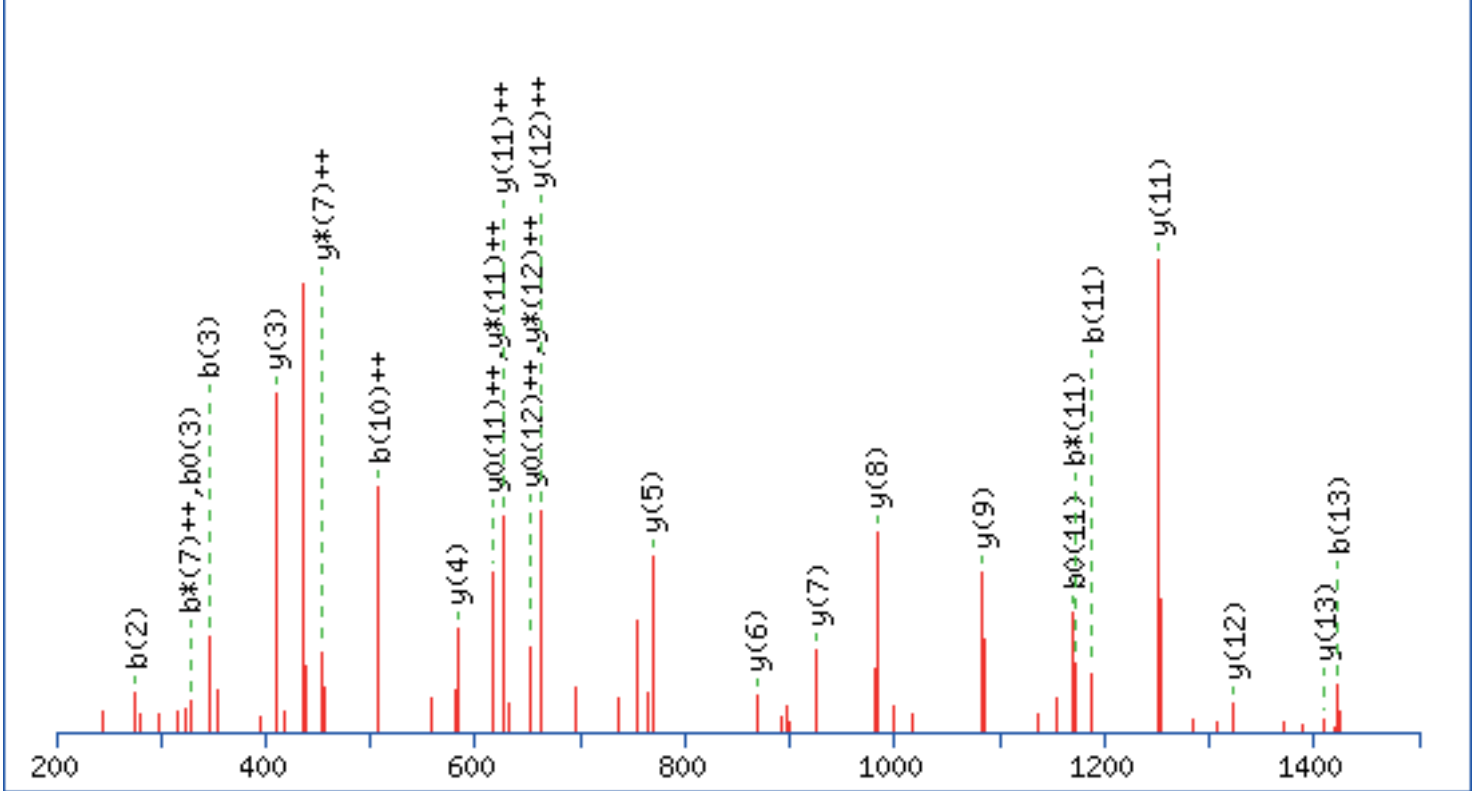

#3454 RT: 48.58  
 T: ITMS + c NSI d w Full ms2 798.98@cid35.00 [205.00-1610.00]

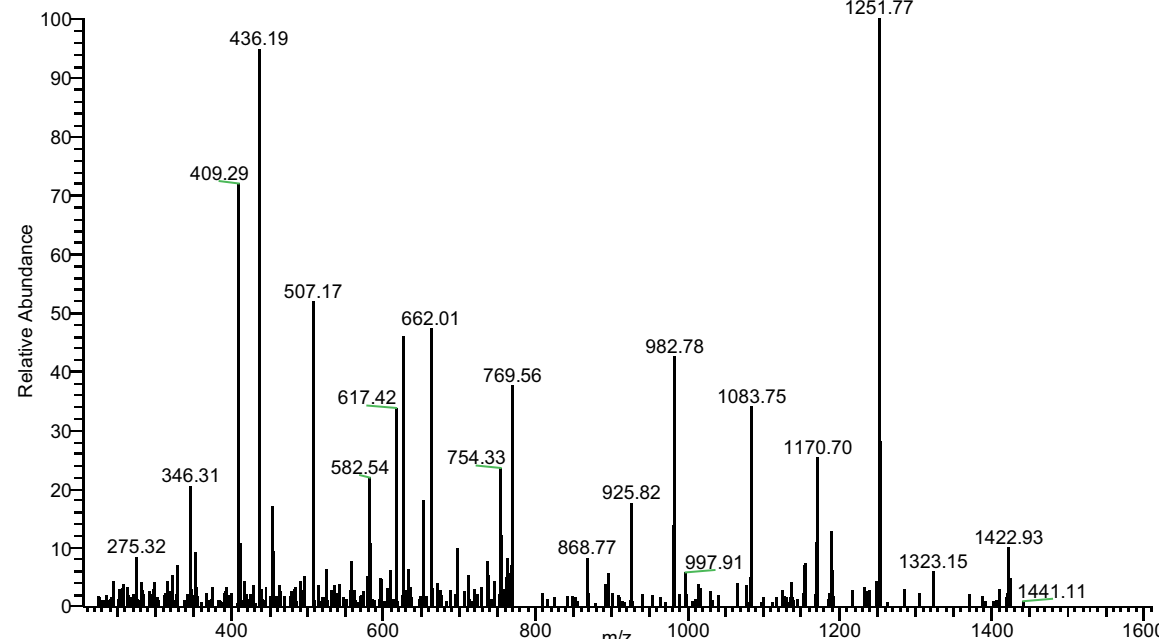

Match to Query 4665: 1533.913701 from(512.311843,3+)  
 1 cycles: 1 preIntensity: 487216.6 FinneganScanNumber: 1473  
 Monoisotopic mass of neutral peptide Mr(calc): 1533.9182

(27-40) H3:  
**K(me2)SAPATGGVK(me2)KPHR**

Variable modifications:

- K1 : Dimethyl (K)
- K10 : Dimethyl (K)
- K11 : Acetyl:2H(3) (K)

Ions Score: 41 Expect: 0.00065

Matches : 43/138 fragment ions using 103 most intense peaks

| #  | b        | b <sup>++</sup> | b <sup>*</sup> | b <sup>***</sup> | b <sup>0</sup> | b <sup>0++</sup> | Seq. | y        | y <sup>++</sup> | y <sup>*</sup> | y <sup>***</sup> | y <sup>0</sup> | y <sup>0++</sup> | #  |
|----|----------|-----------------|----------------|------------------|----------------|------------------|------|----------|-----------------|----------------|------------------|----------------|------------------|----|
| 1  | 157.1335 | 79.0704         | 140.107        | 70.5571          |                |                  | K    |          |                 |                |                  |                |                  | 14 |
| 2  | 244.1656 | 122.5864        | 227.139        | 114.0731         | 226.155        | 113.5811         | S    | 1378.799 | 689.9033        | 1361.773       | 681.39           | 1360.789       | 680.898          | 13 |
| 3  | 315.2027 | 158.105         | 298.1761       | 149.5917         | 297.1921       | 149.0997         | A    | 1291.767 | 646.3873        | 1274.741       | 637.874          | 1273.757       | 637.382          | 12 |
| 4  | 412.2554 | 206.6314        | 395.2289       | 198.1181         | 394.2449       | 197.6261         | P    | 1220.73  | 610.8687        | 1203.704       | 602.3554         | 1202.72        | 601.8634         | 11 |
| 5  | 483.2926 | 242.1499        | 466.266        | 233.6366         | 465.282        | 233.1446         | A    | 1123.677 | 562.3423        | 1106.651       | 553.8291         | 1105.667       | 553.337          | 10 |
| 6  | 584.3402 | 292.6738        | 567.3137       | 284.1605         | 566.3297       | 283.6685         | T    | 1052.64  | 526.8238        | 1035.614       | 518.3105         | 1034.63        | 517.8185         | 9  |
| 7  | 641.3617 | 321.1845        | 624.3352       | 312.6712         | 623.3511       | 312.1792         | G    | 951.5926 | 476.2999        | 934.566        | 467.7867         |                |                  | 8  |
| 8  | 698.3832 | 349.6952        | 681.3566       | 341.1819         | 680.3726       | 340.6899         | G    | 894.5711 | 447.7892        | 877.5446       | 439.2759         |                |                  | 7  |
| 9  | 797.4516 | 399.2294        | 780.425        | 390.7162         | 779.441        | 390.2241         | V    | 837.5497 | 419.2785        | 820.5231       | 410.7652         |                |                  | 6  |
| 10 | 953.5778 | 477.2926        | 936.5513       | 468.7793         | 935.5673       | 468.2873         | K    | 738.4812 | 369.7443        | 721.4547       | 361.231          |                |                  | 5  |
| 11 | 1126.702 | 563.8547        | 1109.676       | 555.3415         | 1108.692       | 554.8495         | K    | 582.355  | 291.6811        | 565.3284       | 283.1679         |                |                  | 4  |
| 12 | 1223.755 | 612.3811        | 1206.728       | 603.8678         | 1205.744       | 603.3758         | P    | 409.2306 | 205.119         | 392.2041       | 196.6057         |                |                  | 3  |
| 13 | 1360.814 | 680.9106        | 1343.787       | 672.3973         | 1342.803       | 671.9053         | H    | 312.1779 | 156.5926        | 295.1513       | 148.0793         |                |                  | 2  |
| 14 |          |                 |                |                  |                |                  | R    | 175.119  | 88.0631         | 158.0924       | 79.5498          |                |                  | 1  |

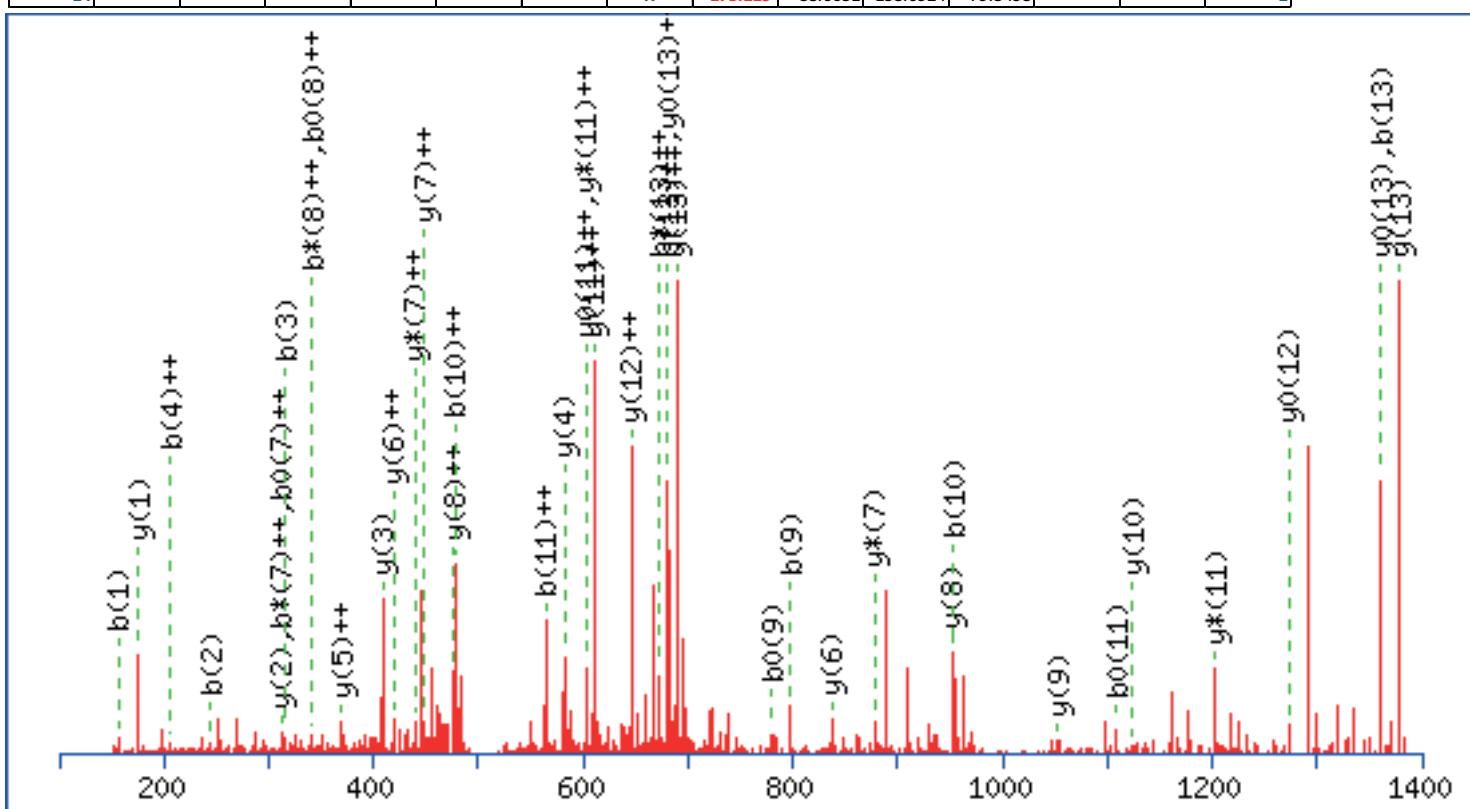

#1473 RT: 32.26  
 T: ITMS + c NSI d w Full ms2 512.31@cid35.00 [130.00-1550.00]

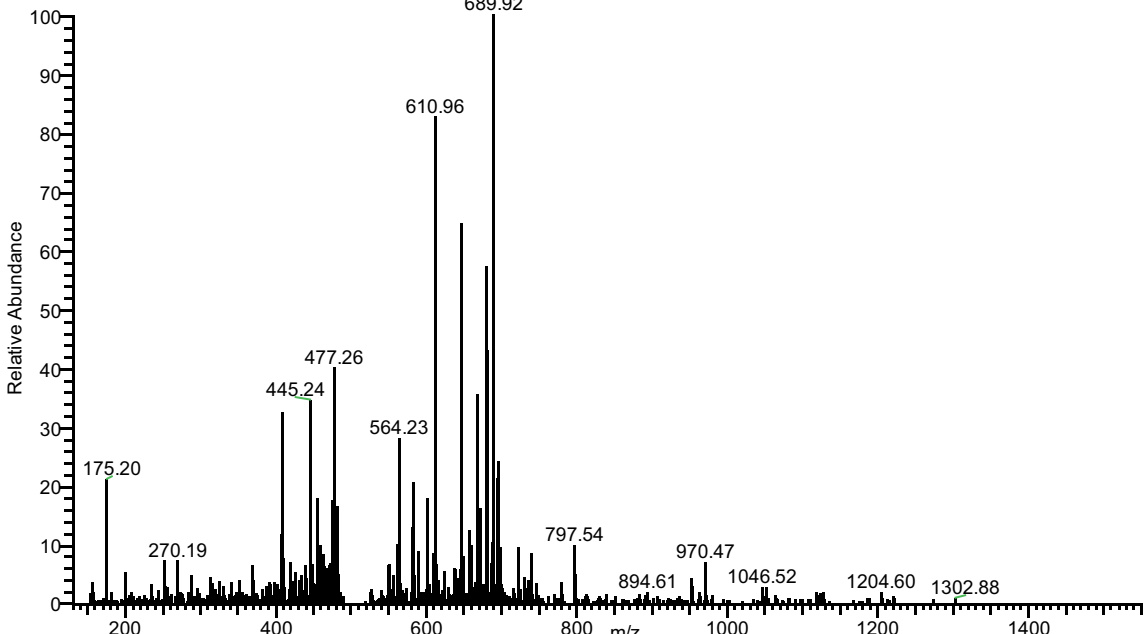



Match to Query 15178.946857 from(527.322895,3+)  
 1 cycles: 1 preIntensity: 6788125.4 FinneganScanNumber: 2819  
 Monoisotopic mass of neutral peptide Mr(calc): 1578.9476

(27-40) H3:  
**K(me3)SAPATGGVK(me1)K**PHR

Variable modifications:

K1 : Trimethyl (K)  
 K10 : Methyl+Acetyl:2H(3) (K)  
 K11 : Acetyl:2H(3) (K)

Ions Score: 35 Expect: 0.0088

Matches : 35/138 fragment ions using 61 most intense peaks

| #  | b        | b <sup>++</sup> | b*       | b <sup>**</sup> | b <sup>0</sup> | b <sup>0++</sup> | Seq. | y        | y <sup>++</sup> | y*       | y <sup>++</sup> | y <sup>0</sup> | y <sup>0++</sup> | #  |
|----|----------|-----------------|----------|-----------------|----------------|------------------|------|----------|-----------------|----------|-----------------|----------------|------------------|----|
| 1  | 171.1492 | 86.0782         | 154.1226 | 77.565          |                |                  | K    |          |                 |          |                 |                |                  | 14 |
| 2  | 258.1812 | 129.5942        | 241.1547 | 121.081         | 240.1707       | 120.589          | S    | 1409.813 | 705.4102        | 1392.787 | 696.8969        | 1391.803       | 696.4049         | 13 |
| 3  | 329.2183 | 165.1128        | 312.1918 | 156.5995        | 311.2078       | 156.1075         | A    | 1322.781 | 661.8941        | 1305.755 | 653.3809        | 1304.77        | 652.8889         | 12 |
| 4  | 426.2711 | 213.6392        | 409.2445 | 205.1259        | 408.2605       | 204.6339         | P    | 1251.744 | 626.3756        | 1234.717 | 617.8623        | 1233.733       | 617.3703         | 11 |
| 5  | 497.3082 | 249.1577        | 480.2817 | 240.6445        | 479.2976       | 240.1525         | A    | 1154.691 | 577.8492        | 1137.665 | 569.3359        | 1136.681       | 568.8439         | 10 |
| 6  | 598.3559 | 299.6816        | 581.3293 | 291.1683        | 580.3453       | 290.6763         | T    | 1083.654 | 542.3306        | 1066.628 | 533.8174        | 1065.644       | 533.3254         | 9  |
| 7  | 655.3774 | 328.1923        | 638.3508 | 319.679         | 637.3668       | 319.187          | G    | 982.6063 | 491.8068        | 965.5798 | 483.2935        |                |                  | 8  |
| 8  | 712.3988 | 356.703         | 695.3723 | 348.1898        | 694.3883       | 347.6978         | G    | 925.5849 | 463.2961        | 908.5583 | 454.7828        |                |                  | 7  |
| 9  | 811.4672 | 406.2373        | 794.4407 | 397.724         | 793.4567       | 397.232          | V    | 868.5634 | 434.7853        | 851.5369 | 426.2721        |                |                  | 6  |
| 10 | 998.6072 | 499.8073        | 981.5807 | 491.294         | 980.5967       | 490.802          | K    | 769.495  | 385.2511        | 752.4684 | 376.7379        |                |                  | 5  |
| 11 | 1171.732 | 586.3694        | 1154.705 | 577.8562        | 1153.721       | 577.3642         | K    | 582.355  | 291.6811        | 565.3284 | 283.1679        |                |                  | 4  |
| 12 | 1268.784 | 634.8958        | 1251.758 | 626.3825        | 1250.774       | 625.8905         | P    | 409.2306 | 205.119         | 392.2041 | 196.6057        |                |                  | 3  |
| 13 | 1405.843 | 703.4253        | 1388.817 | 694.912         | 1387.833       | 694.42           | H    | 312.1779 | 156.5926        | 295.1513 | 148.0793        |                |                  | 2  |
| 14 |          |                 |          |                 |                |                  | R    | 175.119  | 88.0631         | 158.0924 | 79.5498         |                |                  | 1  |

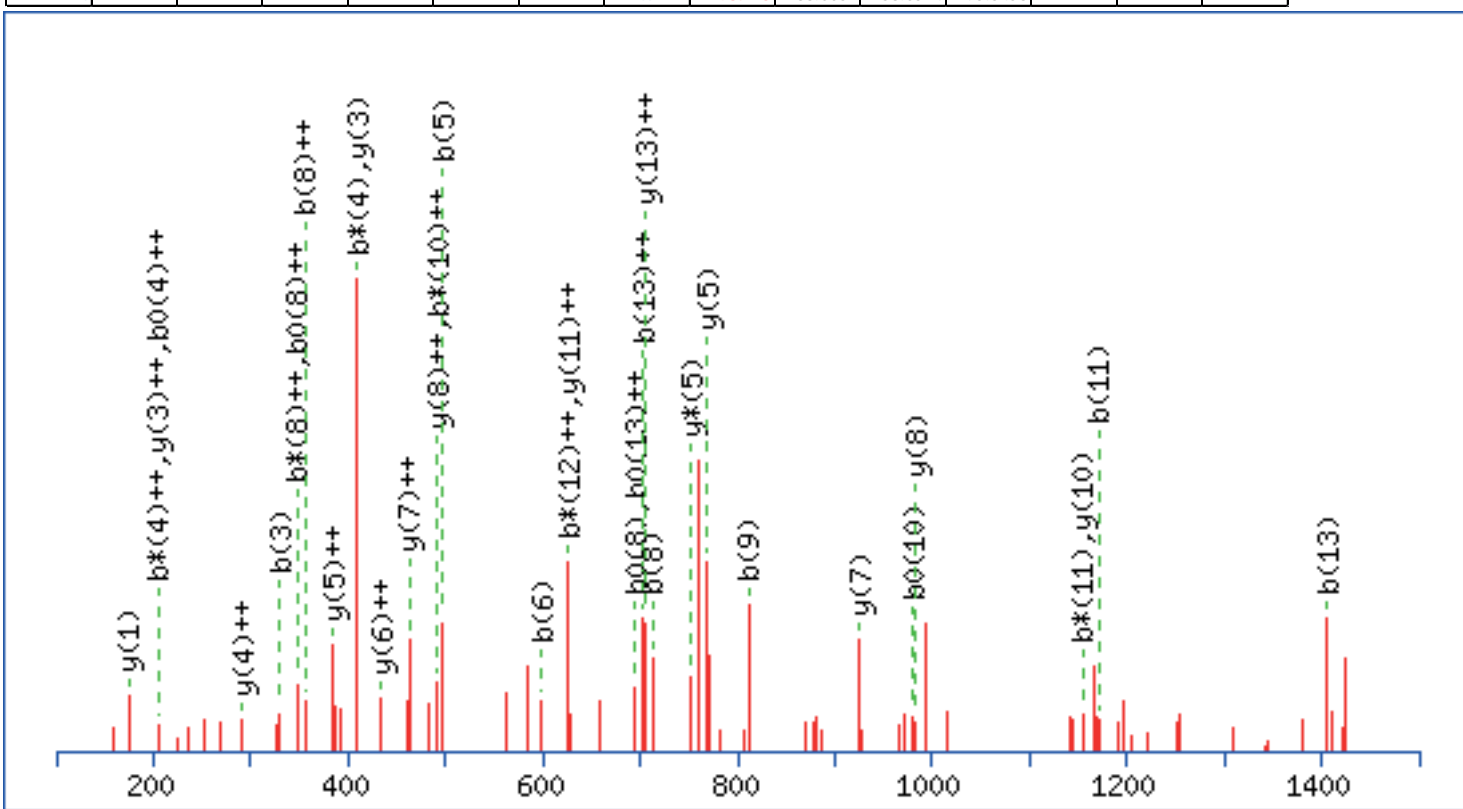

#2819 RT: 39.31  
 T: ITMS + c NSI d w Full ms2 527.32@cid35.00 [135.00-1595.00]

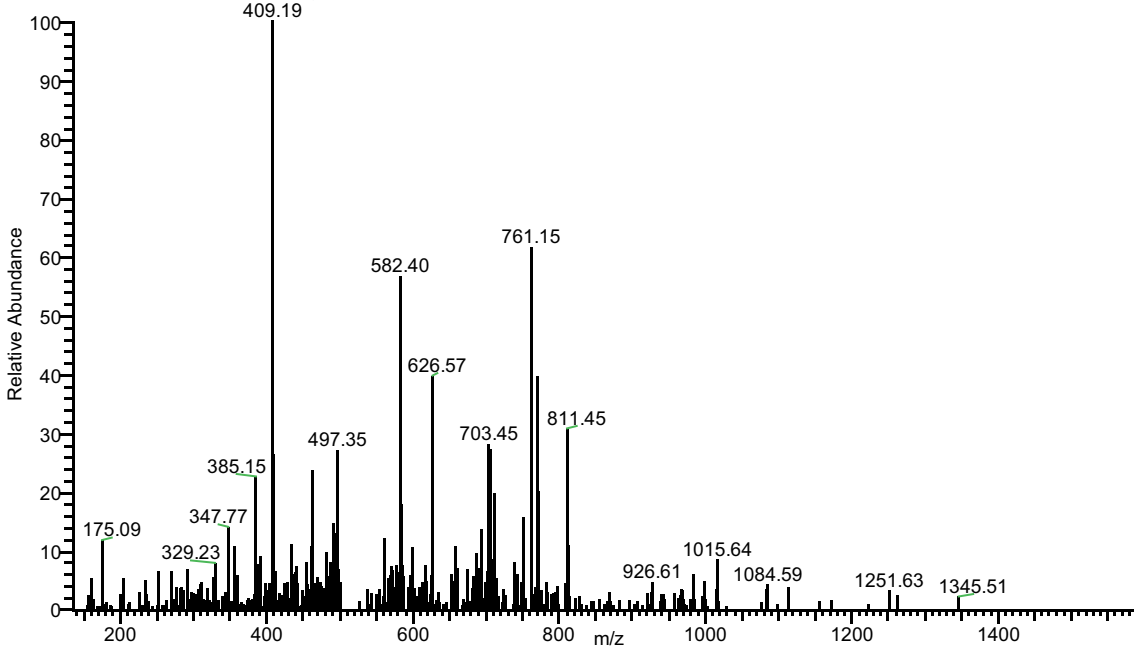

Monoisotopic mass of neutral peptide Mr(calc): 1393.7281

Variable modifications:

K7 : Methyl+Acetyl:2H(3) (K)

Ions Score: 49 Expect: 0.00047

Matches : 16/110 fragment ions using 20 most intense peaks

| #  | b        | b <sup>++</sup> | b*       | b <sup>+++</sup> | b <sup>0</sup> | b <sup>0++</sup> | Seq. | y        | y <sup>++</sup> | y*       | y <sup>+++</sup> | y <sup>0</sup> | y <sup>0++</sup> | #  |
|----|----------|-----------------|----------|------------------|----------------|------------------|------|----------|-----------------|----------|------------------|----------------|------------------|----|
| 1  | 130.0499 | 65.5286         |          |                  | 112.0393       | 56.5233          | E    |          |                 |          |                  |                |                  | 11 |
| 2  | 243.1339 | 122.0706        |          |                  | 225.1234       | 113.0653         | I    | 1265.693 | 633.35          | 1248.666 | 624.8367         | 1247.682       | 624.3447         | 10 |
| 3  | 314.171  | 157.5892        |          |                  | 296.1605       | 148.5839         | A    | 1152.609 | 576.808         | 1135.582 | 568.2947         | 1134.598       | 567.8027         | 9  |
| 4  | 442.2296 | 221.6185        | 425.2031 | 213.1052         | 424.2191       | 212.6132         | Q    | 1081.572 | 541.2894        | 1064.545 | 532.7762         | 1063.561       | 532.2841         | 8  |
| 5  | 557.2566 | 279.1319        | 540.23   | 270.6186         | 539.246        | 270.1266         | D    | 953.513  | 477.2601        | 936.4865 | 468.7469         | 935.5024       | 468.2549         | 7  |
| 6  | 704.325  | 352.6661        | 687.2984 | 344.1529         | 686.3144       | 343.6608         | F    | 838.4861 | 419.7467        | 821.4595 | 411.2334         | 820.4755       | 410.7414         | 6  |
| 7  | 891.465  | 446.2361        | 874.4384 | 437.7229         | 873.4544       | 437.2309         | K    | 691.4176 | 346.2125        | 674.3911 | 337.6992         | 673.4071       | 337.2072         | 5  |
| 8  | 992.5127 | 496.76          | 975.4861 | 488.2467         | 974.5021       | 487.7547         | T    | 504.2776 | 252.6425        | 487.2511 | 244.1292         | 486.2671       | 243.6372         | 4  |
| 9  | 1107.54  | 554.2734        | 1090.513 | 545.7602         | 1089.529       | 545.2682         | D    | 403.23   | 202.1186        | 386.2034 | 193.6053         | 385.2194       | 193.1133         | 3  |
| 10 | 1220.624 | 610.8155        | 1203.597 | 602.3022         | 1202.613       | 601.8102         | L    | 288.203  | 144.6051        | 271.1765 | 136.0919         |                |                  | 2  |
| 11 |          |                 |          |                  |                |                  | R    | 175.119  | 88.0631         | 158.0924 | 79.5498          |                |                  | 1  |

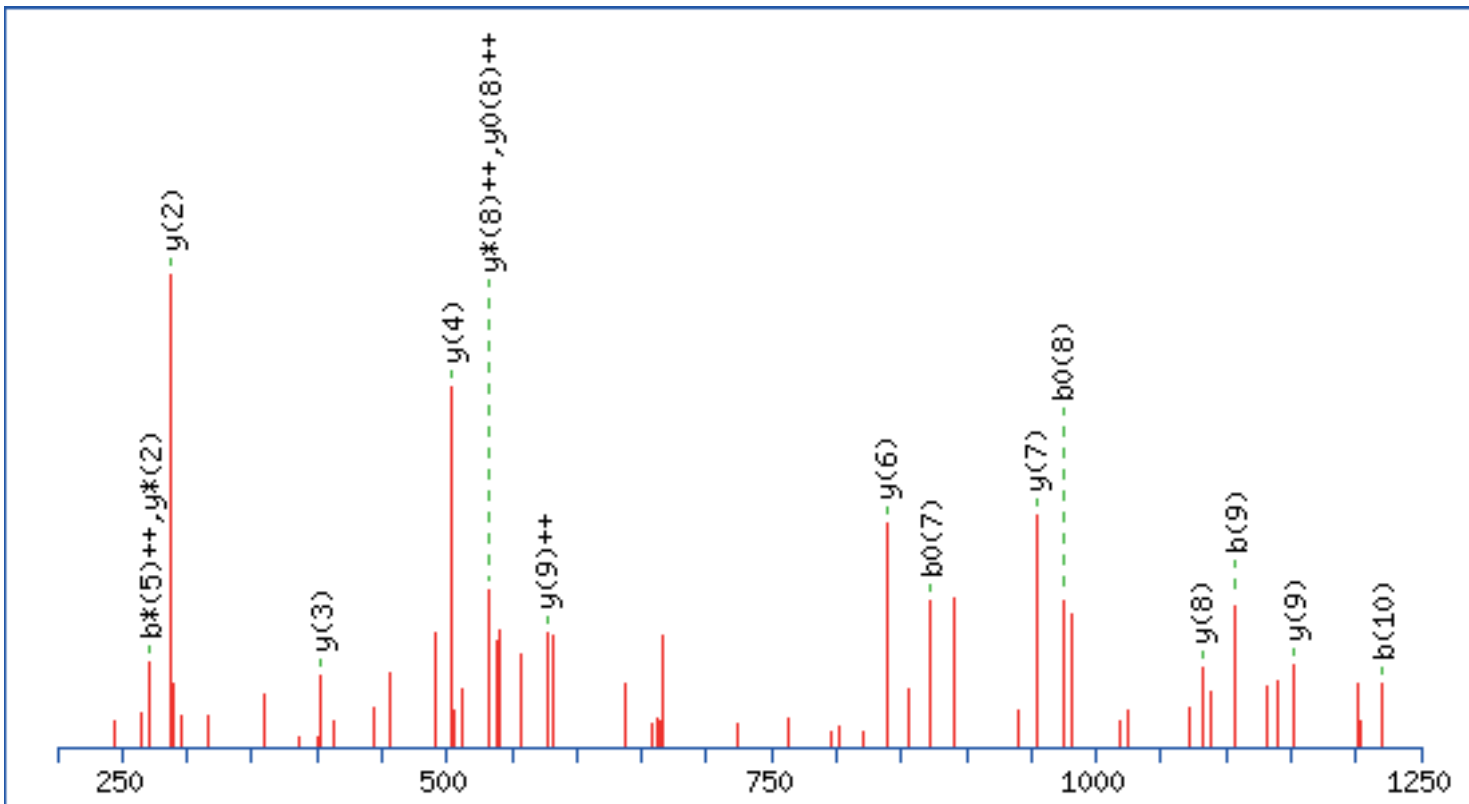

#6769 RT: 79.31  
 T: ITMS + c NSI d w Full ms2 697.87@cid35.00 [180.00-1410.00]

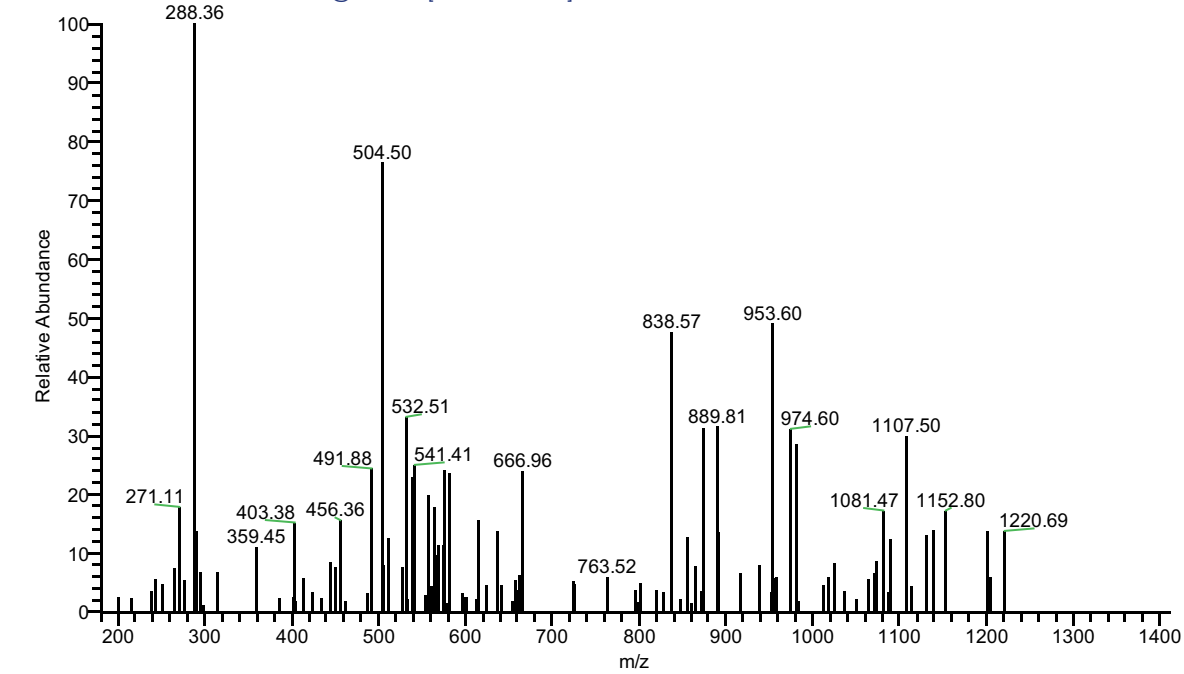

Monoisotopic mass of neutral peptide Mr(calc): 1362.7143  
 Variable modifications:  
 K7 : Dimethyl (K)  
 Ions Score: 32 Expect: 0.0096  
 Matches : 52/110 fragment ions using 105 most intense peaks

| #  | b               | b <sup>++</sup> | b <sup>*</sup> | b <sup>+++</sup> | b <sup>0</sup> | b <sup>0++</sup> | Seq. | y               | y <sup>++</sup> | y <sup>*</sup> | y <sup>+++</sup> | y <sup>0</sup> | y <sup>0++</sup> | #  |
|----|-----------------|-----------------|----------------|------------------|----------------|------------------|------|-----------------|-----------------|----------------|------------------|----------------|------------------|----|
| 1  | 130.0499        | 65.5286         |                |                  | 112.0393       | 56.5233          | E    |                 |                 |                |                  |                |                  | 11 |
| 2  | <b>243.1339</b> | 122.0706        |                |                  | 225.1234       | 113.0653         | I    | <b>1234.679</b> | 617.8431        | 1217.653       | 609.3299         | 1216.668       | 608.8379         | 10 |
| 3  | 314.171         | 157.5892        |                |                  | 296.1605       | 148.5839         | A    | <b>1121.595</b> | 561.3011        | 1104.568       | 552.7878         | 1103.584       | 552.2958         | 9  |
| 4  | 442.2296        | 221.6185        | 425.2031       | 213.1052         | 424.2191       | 212.6132         | Q    | <b>1050.558</b> | 525.7826        | 1033.531       | 517.2693         | 1032.547       | 516.7773         | 8  |
| 5  | <b>557.2566</b> | 279.1319        | 540.23         | 270.6186         | 539.246        | 270.1266         | D    | <b>922.4993</b> | 461.7533        | 905.4727       | 453.24           | 904.4887       | 452.748          | 7  |
| 6  | <b>704.325</b>  | 352.6661        | 687.2984       | 344.1529         | 686.3144       | 343.6608         | F    | <b>807.4723</b> | 404.2398        | 790.4458       | 395.7265         | 789.4617       | 395.2345         | 6  |
| 7  | <b>860.4512</b> | 430.7293        | 843.4247       | 422.216          | 842.4407       | 421.724          | K    | 660.4039        | 330.7056        | 643.3774       | 322.1923         | 642.3933       | 321.7003         | 5  |
| 8  | <b>961.4989</b> | 481.2531        | 944.4724       | 472.7398         | 943.4884       | 472.2478         | T    | <b>504.2776</b> | 252.6425        | 487.2511       | 244.1292         | 486.2671       | 243.6372         | 4  |
| 9  | <b>1076.526</b> | 538.7666        | 1059.499       | 530.2533         | 1058.515       | 529.7613         | D    | 403.23          | 202.1186        | 386.2034       | 193.6053         | 385.2194       | 193.1133         | 3  |
| 10 | <b>1189.61</b>  | 595.3086        | 1172.583       | 586.7953         | 1171.599       | 586.3033         | L    | <b>288.203</b>  | 144.6051        | 271.1765       | 136.0919         |                |                  | 2  |
| 11 |                 |                 |                |                  |                |                  | R    | 175.119         | 88.0631         | 158.0924       | 79.5498          |                |                  | 1  |

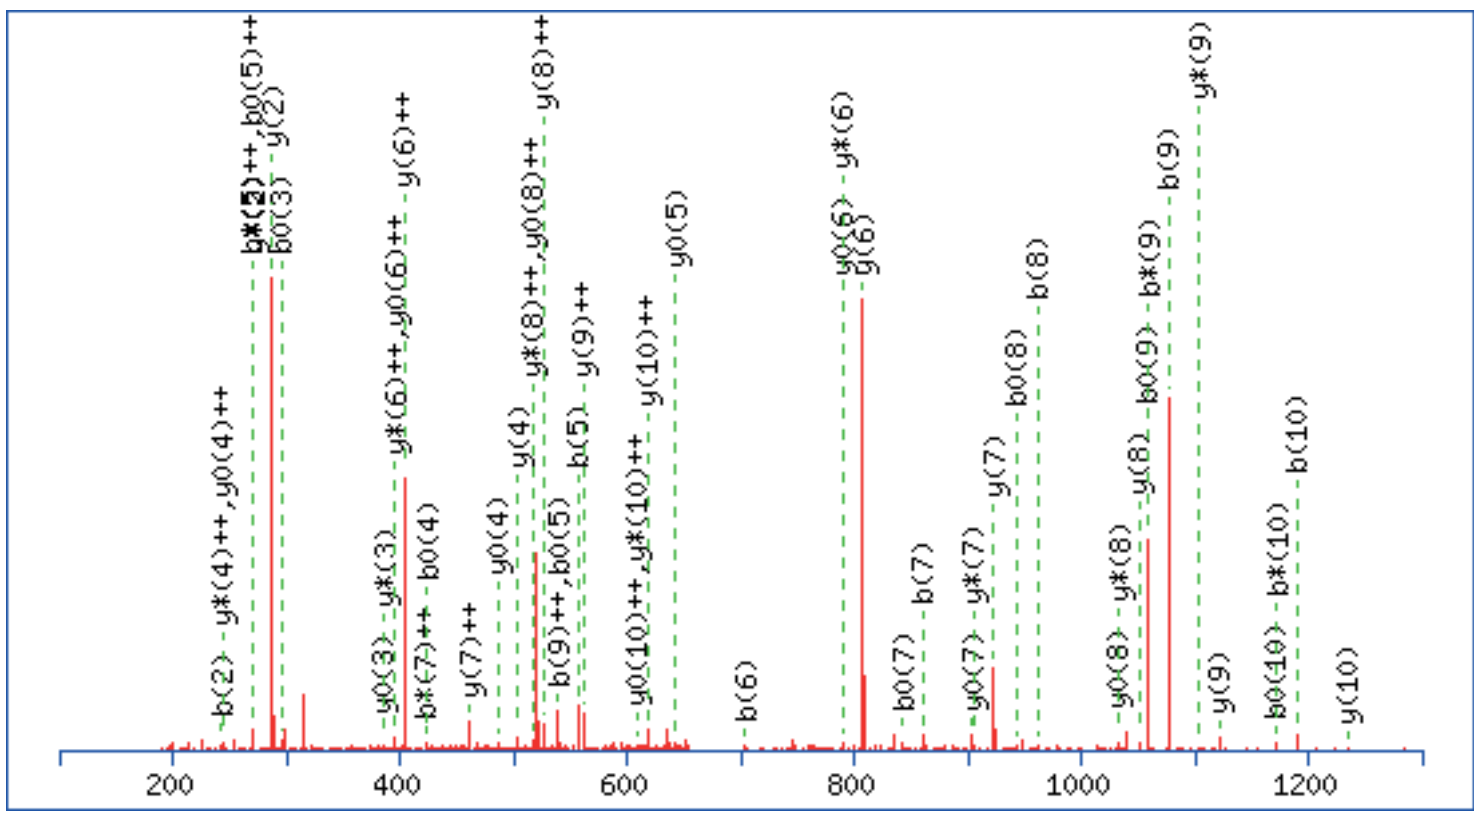

#3300 RT: 55.26  
 T: ITMS + c NSI d w Full ms2 682.37@cid35.00 [175.00-1375.00]

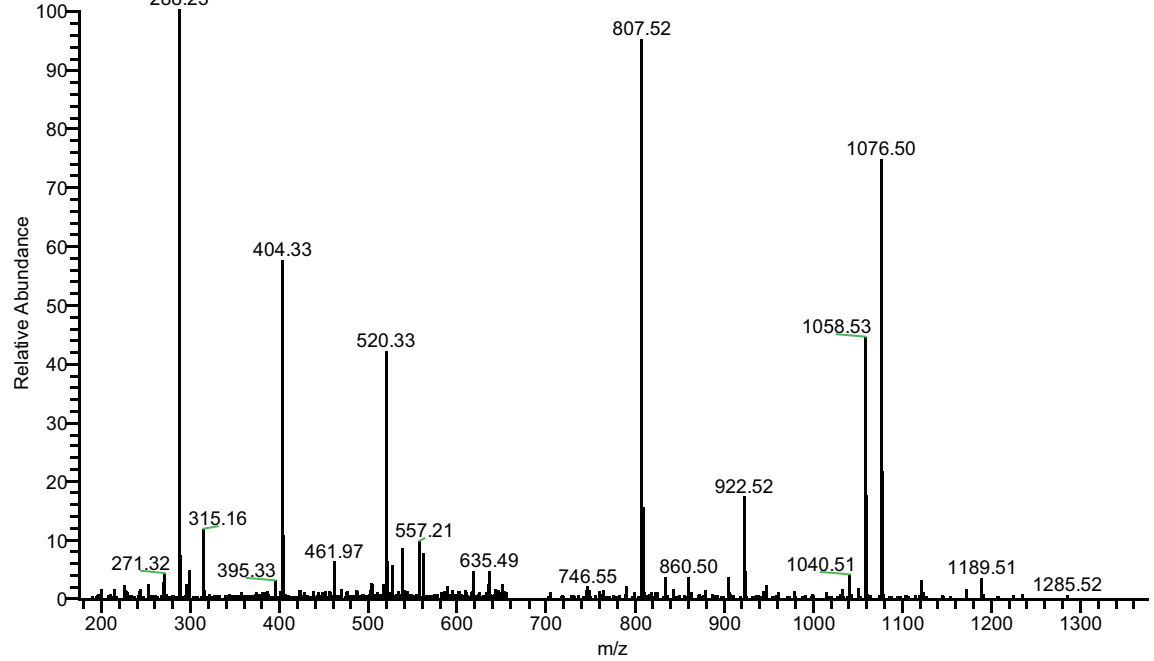

Match to Query 2358: 887.503504 from(444.759028,2+)  
 1 cycles: 1 preIntensity: 1832389.1 FinneganScanNumber: 680

(4-11) H2A:  
 GK(Ac)QGGKAR

Monoisotopic mass of neutral peptide Mr(calc): 887.5016

Variable modifications:

K2 : Acetyl (K)

K6 : Acetyl:2H(3) (K)

Ions Score: 22 Expect: 0.071

Matches : 5/54 fragment ions using 8 most intense peaks

| # | b        | b <sup>++</sup> | b <sup>*</sup> | b <sup>***</sup> | Seq. | y        | y <sup>++</sup> | y <sup>*</sup> | y <sup>***</sup> | # |
|---|----------|-----------------|----------------|------------------|------|----------|-----------------|----------------|------------------|---|
| 1 | 58.0287  | 29.518          |                |                  | G    |          |                 |                |                  | 8 |
| 2 | 228.1343 | 114.5708        | 211.1077       | 106.0575         | K    | 831.4875 | 416.2474        | 814.4609       | 407.7341         | 7 |
| 3 | 356.1928 | 178.6001        | 339.1663       | 170.0868         | Q    | 661.3819 | 331.1946        | 644.3554       | 322.6813         | 6 |
| 4 | 413.2143 | 207.1108        | 396.1878       | 198.5975         | G    | 533.3234 | 267.1653        | 516.2968       | 258.652          | 5 |
| 5 | 470.2358 | 235.6215        | 453.2092       | 227.1083         | G    | 476.3019 | 238.6546        | 459.2753       | 230.1413         | 4 |
| 6 | 643.3601 | 322.1837        | 626.3336       | 313.6704         | K    | 419.2804 | 210.1438        | 402.2539       | 201.6306         | 3 |
| 7 | 714.3972 | 357.7023        | 697.3707       | 349.189          | A    | 246.1561 | 123.5817        | 229.1295       | 115.0684         | 2 |
| 8 |          |                 |                |                  | R    | 175.119  | 88.0631         | 158.0924       | 79.5498          | 1 |

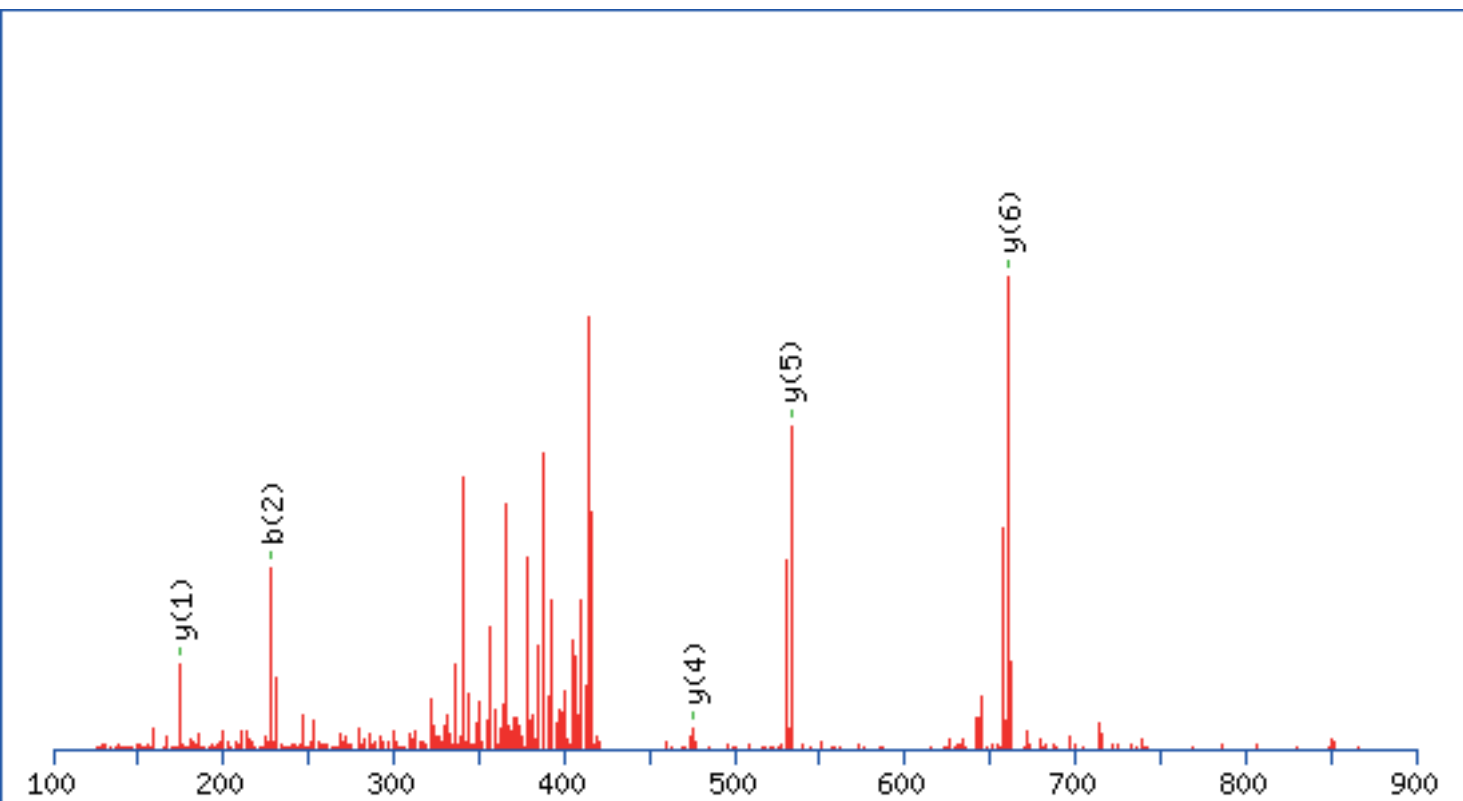

#680 RT: 25.99  
 T: ITMS + c NSI d w Full ms2 444.76@cid35.00 [110.00-900.00]

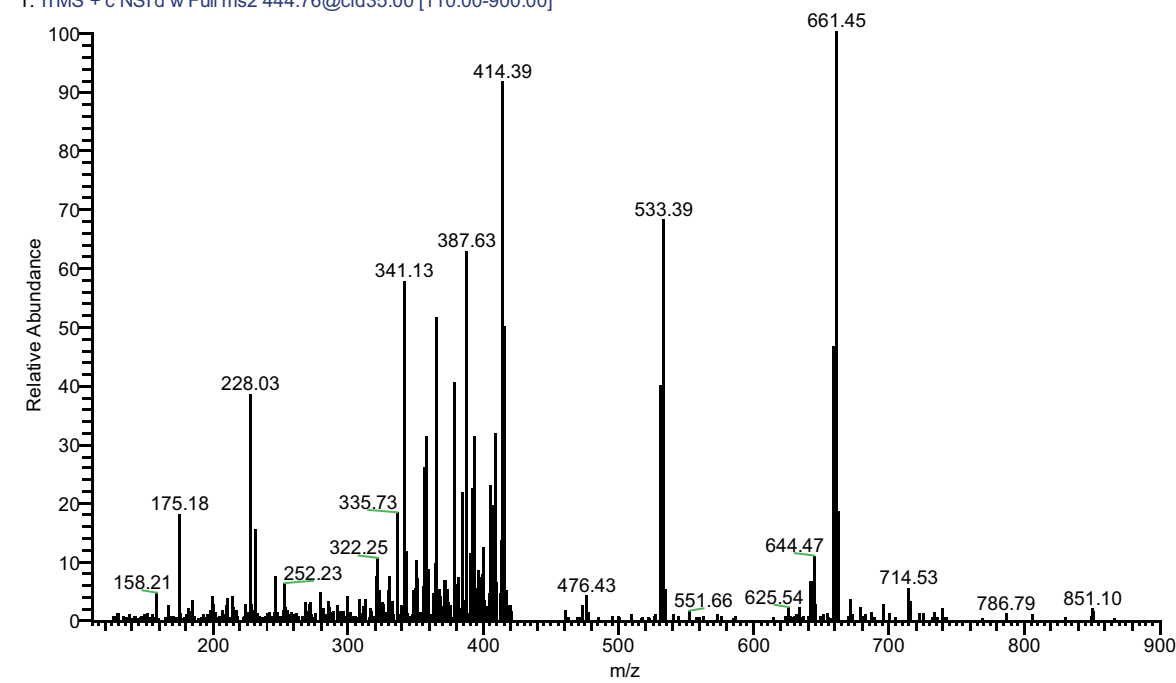

Match to Query 4588: 884.485432 from(443.249992,2+)  
 1 cycles: 1 preIntensity: 175756.1 FinneganScanNumber: 918

(4-11) H2A:  
 GK(Ac)QGGK(Ac)AR

Monoisotopic mass of neutral peptide Mr(calc): 884.4828

Variable modifications:

K2 : Acetyl (K)

K6 : Acetyl (K)

Ions Score: 32 Expect: 0.0048

Matches : 13/54 fragment ions using 19 most intense peaks

| # | b               | b <sup>++</sup> | b <sup>*</sup>  | b <sup>***</sup> | Seq. | y               | y <sup>++</sup> | y <sup>*</sup>  | y <sup>***</sup> | # |
|---|-----------------|-----------------|-----------------|------------------|------|-----------------|-----------------|-----------------|------------------|---|
| 1 | 58.0287         | 29.518          |                 |                  | G    |                 |                 |                 |                  | 8 |
| 2 | <b>228.1343</b> | 114.5708        | <b>211.1077</b> | 106.0575         | K    | 828.4686        | 414.738         | 811.4421        | 406.2247         | 7 |
| 3 | <b>356.1928</b> | 178.6001        | 339.1663        | 170.0868         | Q    | <b>658.3631</b> | 329.6852        | <b>641.3366</b> | <b>321.1719</b>  | 6 |
| 4 | 413.2143        | 207.1108        | 396.1878        | 198.5975         | G    | <b>530.3045</b> | 265.6559        | 513.278         | 257.1426         | 5 |
| 5 | 470.2358        | 235.6215        | 453.2092        | 227.1083         | G    | <b>473.2831</b> | 237.1452        | 456.2565        | <b>228.6319</b>  | 4 |
| 6 | 640.3413        | <b>320.6743</b> | 623.3148        | 312.161          | K    | 416.2616        | 208.6344        | 399.235         | 200.1212         | 3 |
| 7 | 711.3784        | <b>356.1928</b> | 694.3519        | 347.6796         | A    | <b>246.1561</b> | 123.5817        | 229.1295        | 115.0684         | 2 |
| 8 |                 |                 |                 |                  | R    | <b>175.119</b>  | 88.0631         | 158.0924        | 79.5498          | 1 |

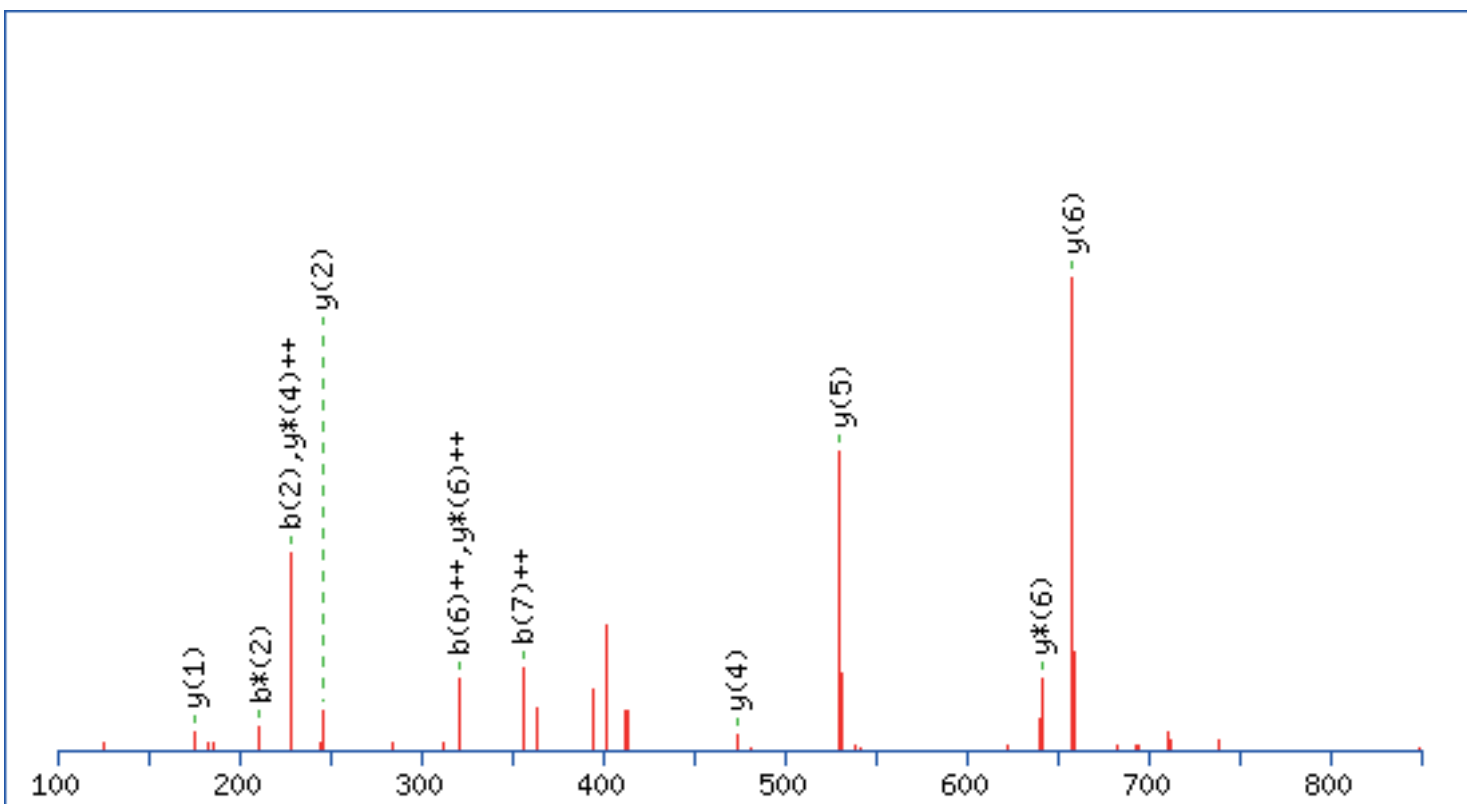

#918 RT: 25.87  
 T: ITMS + c NSI d w Full ms2 443.25@cid35.00 [110.00-900.00]

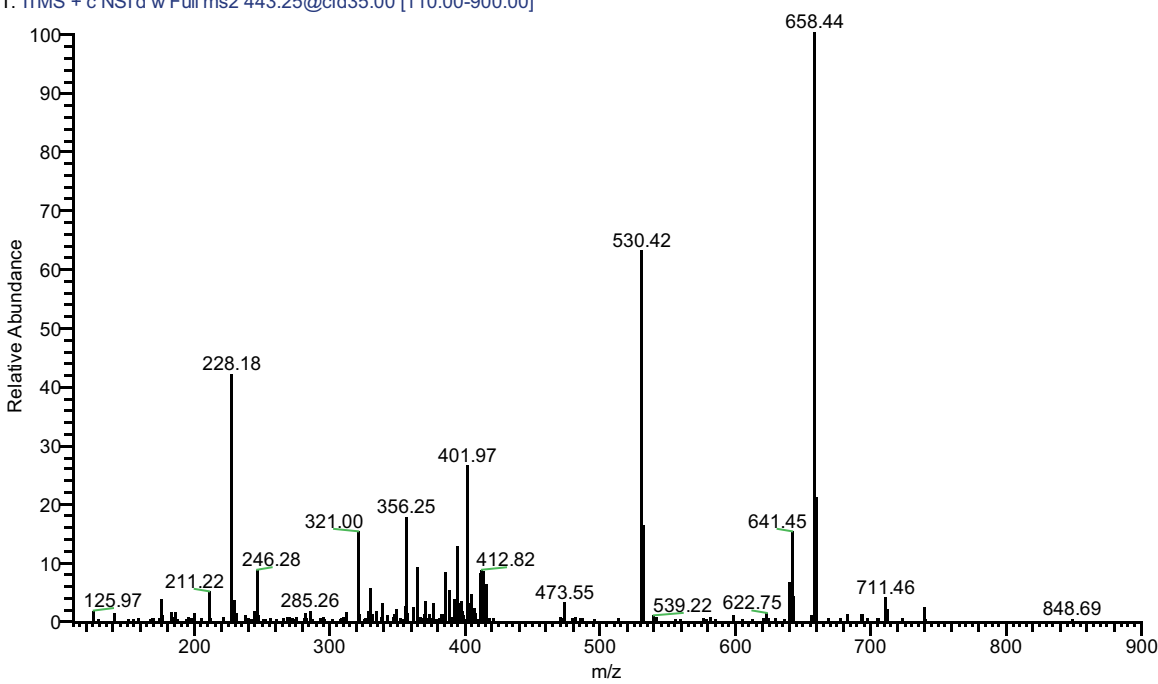

Match to Query 10349: 1446.860830 from(724.437691,2+)  
 1 cycles: 1 preIntensity: 869333.4 FinneganScanNumber: 4119  
 Monoisotopic mass of neutral peptide Mr(calc): 1446.8617

(4-17) H4:  
 GKGGK(Ac)GLGKGGAKR

Variable modifications:

K2 : Acetyl:2H(3) (K) K9 : Acetyl:2H(3) (K)  
 K5 : Acetyl (K) K13 : Acetyl:2H(3) (K)

Ions Score: 32 Expect: 0.0017

Matches : 33/102 fragment ions using 101 most intense peaks

| #  | b        | b <sup>++</sup> | b <sup>*</sup> | b <sup>***</sup> | Seq. | y        | y <sup>++</sup> | y <sup>*</sup> | y <sup>***</sup> | #  |
|----|----------|-----------------|----------------|------------------|------|----------|-----------------|----------------|------------------|----|
| 1  | 58.0287  | 29.518          |                |                  | G    |          |                 |                |                  | 14 |
| 2  | 231.1531 | 116.0802        | 214.1265       | 107.5669         | K    | 1390.848 | 695.9274        | 1373.821       | 687.4141         | 13 |
| 3  | 288.1746 | 144.5909        | 271.148        | 136.0776         | G    | 1217.723 | 609.3652        | 1200.697       | 600.8519         | 12 |
| 4  | 345.196  | 173.1017        | 328.1695       | 164.5884         | G    | 1160.702 | 580.8545        | 1143.675       | 572.3412         | 11 |
| 5  | 515.3016 | 258.1544        | 498.275        | 249.6411         | K    | 1103.68  | 552.3438        | 1086.654       | 543.8305         | 10 |
| 6  | 572.323  | 286.6651        | 555.2965       | 278.1519         | G    | 933.5747 | 467.291         | 916.5482       | 458.7777         | 9  |
| 7  | 685.4071 | 343.2072        | 668.3805       | 334.6939         | L    | 876.5532 | 438.7803        | 859.5267       | 430.267          | 8  |
| 8  | 742.4285 | 371.7179        | 725.402        | 363.2046         | G    | 763.4692 | 382.2382        | 746.4426       | 373.725          | 7  |
| 9  | 915.5529 | 458.2801        | 898.5264       | 449.7668         | K    | 706.4477 | 353.7275        | 689.4212       | 345.2142         | 6  |
| 10 | 972.5744 | 486.7908        | 955.5478       | 478.2775         | G    | 533.3234 | 267.1653        | 516.2968       | 258.652          | 5  |
| 11 | 1029.596 | 515.3016        | 1012.569       | 506.7883         | G    | 476.3019 | 238.6546        | 459.2753       | 230.1413         | 4  |
| 12 | 1100.633 | 550.8201        | 1083.606       | 542.3068         | A    | 419.2804 | 210.1438        | 402.2539       | 201.6306         | 3  |
| 13 | 1273.757 | 637.3823        | 1256.731       | 628.869          | K    | 348.2433 | 174.6253        | 331.2168       | 166.112          | 2  |
| 14 |          |                 |                |                  | R    | 175.119  | 88.0631         | 158.0924       | 79.5498          | 1  |

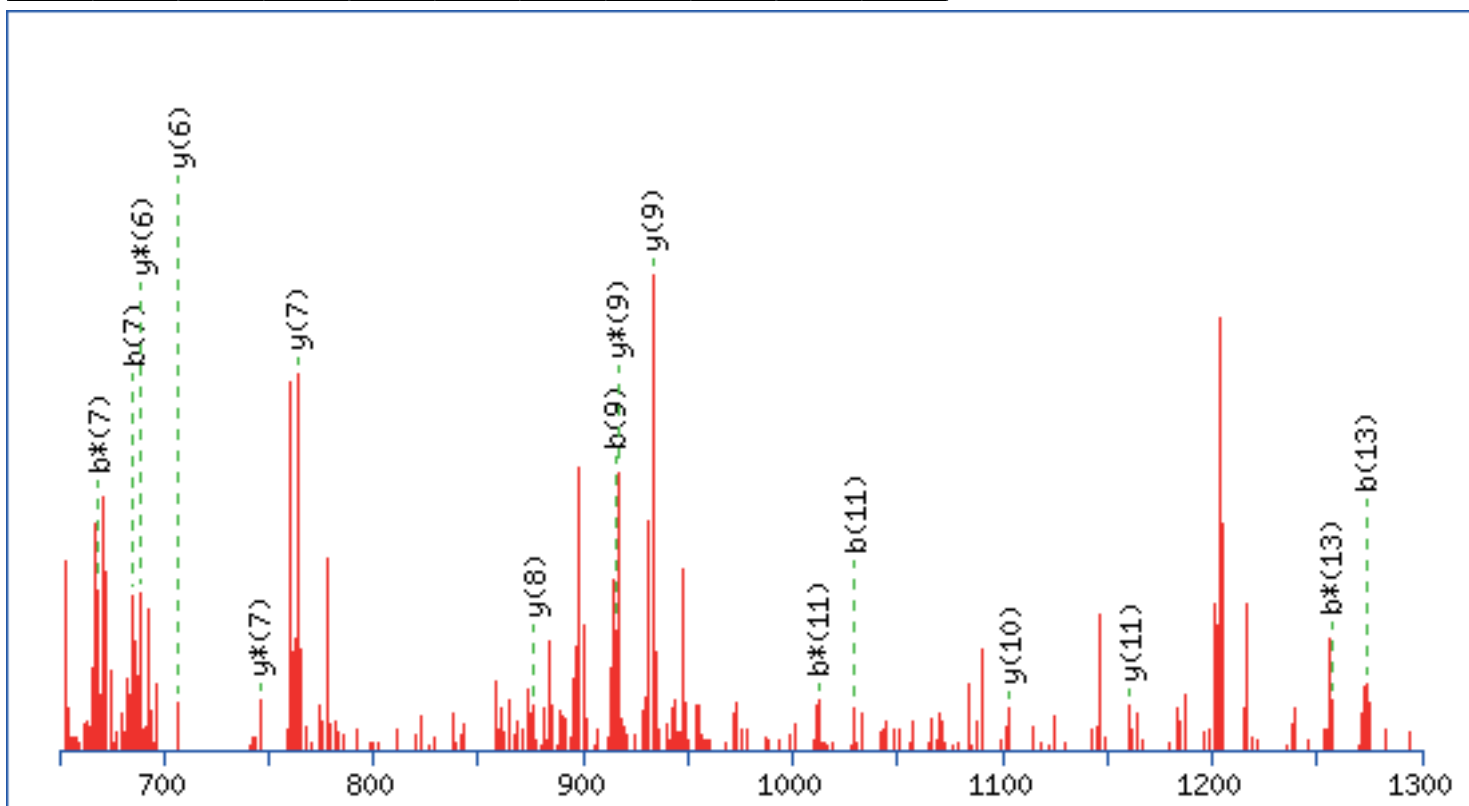

#4119 RT: 52.44  
 T: ITMS + c NSI d w Full ms2 724.44@cid35.00 [185.00-1460.00]

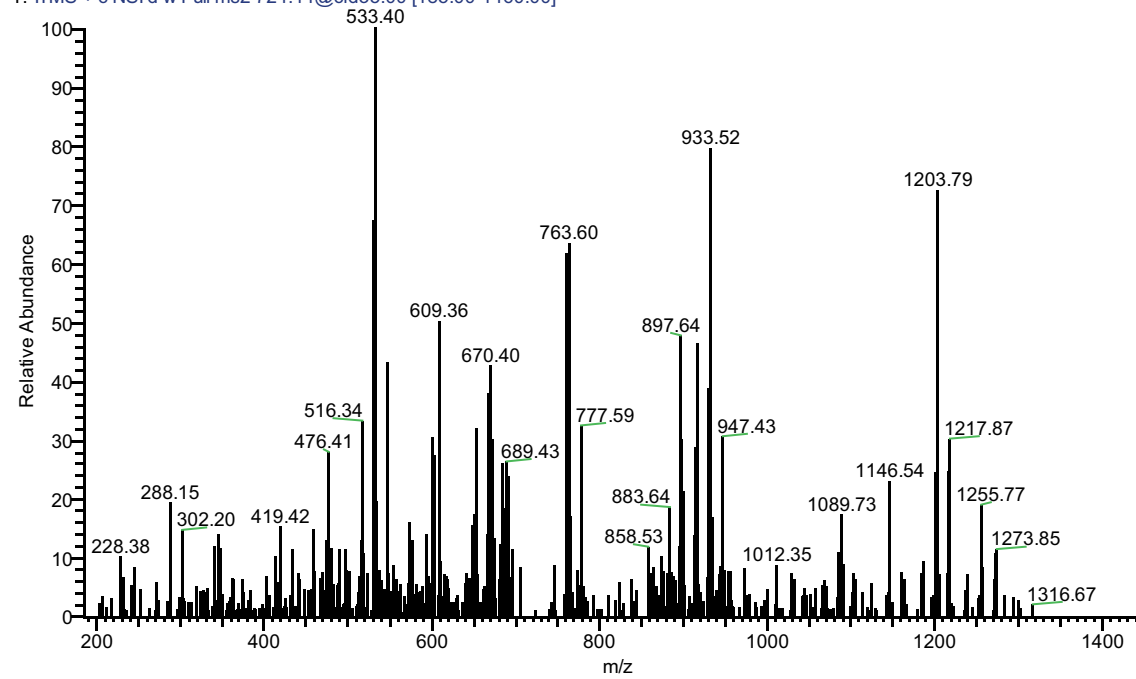

Match to Query 10342: 1446.853114 from(724.433833,2+)  
 1 cycles: 1 preIntensity: 681329894.1 FinneganScanNumber: 3810  
 Monoisotopic mass of neutral peptide Mr(calc): 1446.8617

(4-17) H4:  
 GKGGKGLGKGGAK(Ac)R

Variable modifications:

K2 : Acetyl:2H(3) (K) K9 : Acetyl:2H(3) (K)  
 K5 : Acetyl:2H(3) (K) K13 : Acetyl (K)

Ions Score: 65 Expect: 3.1e-06

Matches : 12/102 fragment ions using 12 most intense peaks

| #  | b        | b <sup>++</sup> | b <sup>*</sup> | b <sup>***</sup> | Seq. | γ        | γ <sup>++</sup> | γ <sup>*</sup> | γ <sup>***</sup> | #  |
|----|----------|-----------------|----------------|------------------|------|----------|-----------------|----------------|------------------|----|
| 1  | 58.0287  | 29.518          |                |                  | G    |          |                 |                |                  | 14 |
| 2  | 231.1531 | 116.0802        | 214.1265       | 107.5669         | K    | 1390.848 | 695.9274        | 1373.821       | 687.4141         | 13 |
| 3  | 288.1746 | 144.5909        | 271.148        | 136.0776         | G    | 1217.723 | 609.3652        | 1200.697       | 600.8519         | 12 |
| 4  | 345.196  | 173.1017        | 328.1695       | 164.5884         | G    | 1160.702 | 580.8545        | 1143.675       | 572.3412         | 11 |
| 5  | 518.3204 | 259.6638        | 501.2938       | 251.1506         | K    | 1103.68  | 552.3438        | 1086.654       | 543.8305         | 10 |
| 6  | 575.3418 | 288.1746        | 558.3153       | 279.6613         | G    | 930.5559 | 465.7816        | 913.5293       | 457.2683         | 9  |
| 7  | 688.4259 | 344.7166        | 671.3994       | 336.2033         | L    | 873.5344 | 437.2708        | 856.5079       | 428.7576         | 8  |
| 8  | 745.4474 | 373.2273        | 728.4208       | 364.7141         | G    | 760.4503 | 380.7288        | 743.4238       | 372.2155         | 7  |
| 9  | 918.5717 | 459.7895        | 901.5452       | 451.2762         | K    | 703.4289 | 352.2181        | 686.4023       | 343.7048         | 6  |
| 10 | 975.5932 | 488.3002        | 958.5666       | 479.787          | G    | 530.3045 | 265.6559        | 513.278        | 257.1426         | 5  |
| 11 | 1032.615 | 516.811         | 1015.588       | 508.2977         | G    | 473.2831 | 237.1452        | 456.2565       | 228.6319         | 4  |
| 12 | 1103.652 | 552.3295        | 1086.625       | 543.8163         | A    | 416.2616 | 208.6344        | 399.235        | 200.1212         | 3  |
| 13 | 1273.757 | 637.3823        | 1256.731       | 628.869          | K    | 345.2245 | 173.1159        | 328.1979       | 164.6026         | 2  |
| 14 |          |                 |                |                  | R    | 175.119  | 88.0631         | 158.0924       | 79.5498          | 1  |

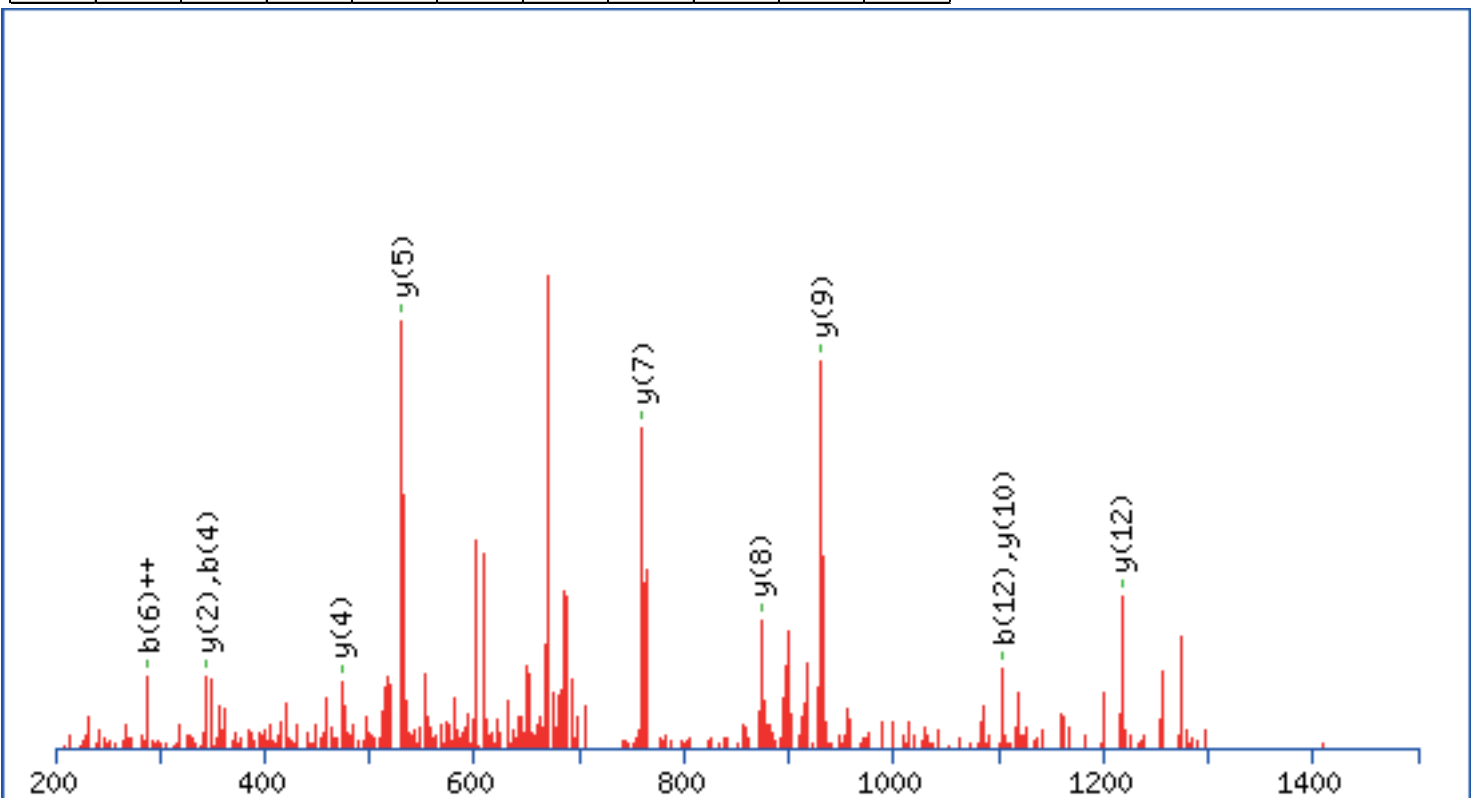

#3810 RT: 50.17  
 T: ITMS + c NSI d w Full ms2 724.44@cid35.00 [185.00-1460.00]

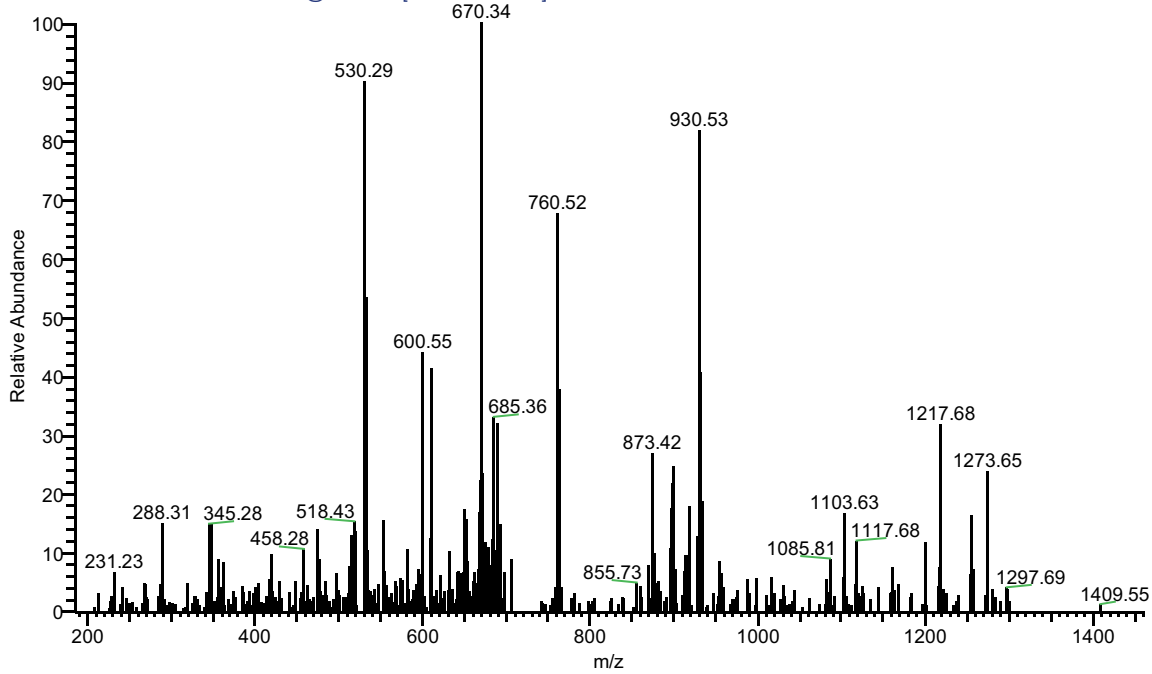

Match to Query 7926: 1443.829152 from(722.921852,2+)  
 1 cycles: 1 preIntensity: 2228569.7 FinneganScanNumber: 6133  
 Monoisotopic mass of neutral peptide Mr(calc): 1443.8428

(4-17) H4:  
 GK(Ac)GGKGLGKGGAK(Ac)R

Variable modifications:

K2 : Acetyl (K) K9 : Acetyl:2H(3) (K)  
 K5 : Acetyl:2H(3) (K) K13 : Acetyl (K)

Ions Score: 21 Expect: 0.05

Matches : 13/102 fragment ions using 23 most intense peaks

| #  | b        | b <sup>++</sup> | b <sup>*</sup> | b <sup>***</sup> | Seq. | y        | y <sup>++</sup> | y <sup>*</sup> | y <sup>***</sup> | #  |
|----|----------|-----------------|----------------|------------------|------|----------|-----------------|----------------|------------------|----|
| 1  | 58.0287  | 29.518          |                |                  | G    |          |                 |                |                  | 14 |
| 2  | 228.1343 | 114.5708        | 211.1077       | 106.0575         | K    | 1387.829 | 694.418         | 1370.802       | 685.9047         | 13 |
| 3  | 285.1557 | 143.0815        | 268.1292       | 134.5682         | G    | 1217.723 | 609.3652        | 1200.697       | 600.8519         | 12 |
| 4  | 342.1772 | 171.5922        | 325.1506       | 163.079          | G    | 1160.702 | 580.8545        | 1143.675       | 572.3412         | 11 |
| 5  | 515.3016 | 258.1544        | 498.275        | 249.6411         | K    | 1103.68  | 552.3438        | 1086.654       | 543.8305         | 10 |
| 6  | 572.323  | 286.6651        | 555.2965       | 278.1519         | G    | 930.5559 | 465.7816        | 913.5293       | 457.2683         | 9  |
| 7  | 685.4071 | 343.2072        | 668.3805       | 334.6939         | L    | 873.5344 | 437.2708        | 856.5079       | 428.7576         | 8  |
| 8  | 742.4285 | 371.7179        | 725.402        | 363.2046         | G    | 760.4503 | 380.7288        | 743.4238       | 372.2155         | 7  |
| 9  | 915.5529 | 458.2801        | 898.5264       | 449.7668         | K    | 703.4289 | 352.2181        | 686.4023       | 343.7048         | 6  |
| 10 | 972.5744 | 486.7908        | 955.5478       | 478.2775         | G    | 530.3045 | 265.6559        | 513.278        | 257.1426         | 5  |
| 11 | 1029.596 | 515.3016        | 1012.569       | 506.7883         | G    | 473.2831 | 237.1452        | 456.2565       | 228.6319         | 4  |
| 12 | 1100.633 | 550.8201        | 1083.606       | 542.3068         | A    | 416.2616 | 208.6344        | 399.235        | 200.1212         | 3  |
| 13 | 1270.739 | 635.8729        | 1253.712       | 627.3596         | K    | 345.2245 | 173.1159        | 328.1979       | 164.6026         | 2  |
| 14 |          |                 |                |                  | R    | 175.119  | 88.0631         | 158.0924       | 79.5498          |    |

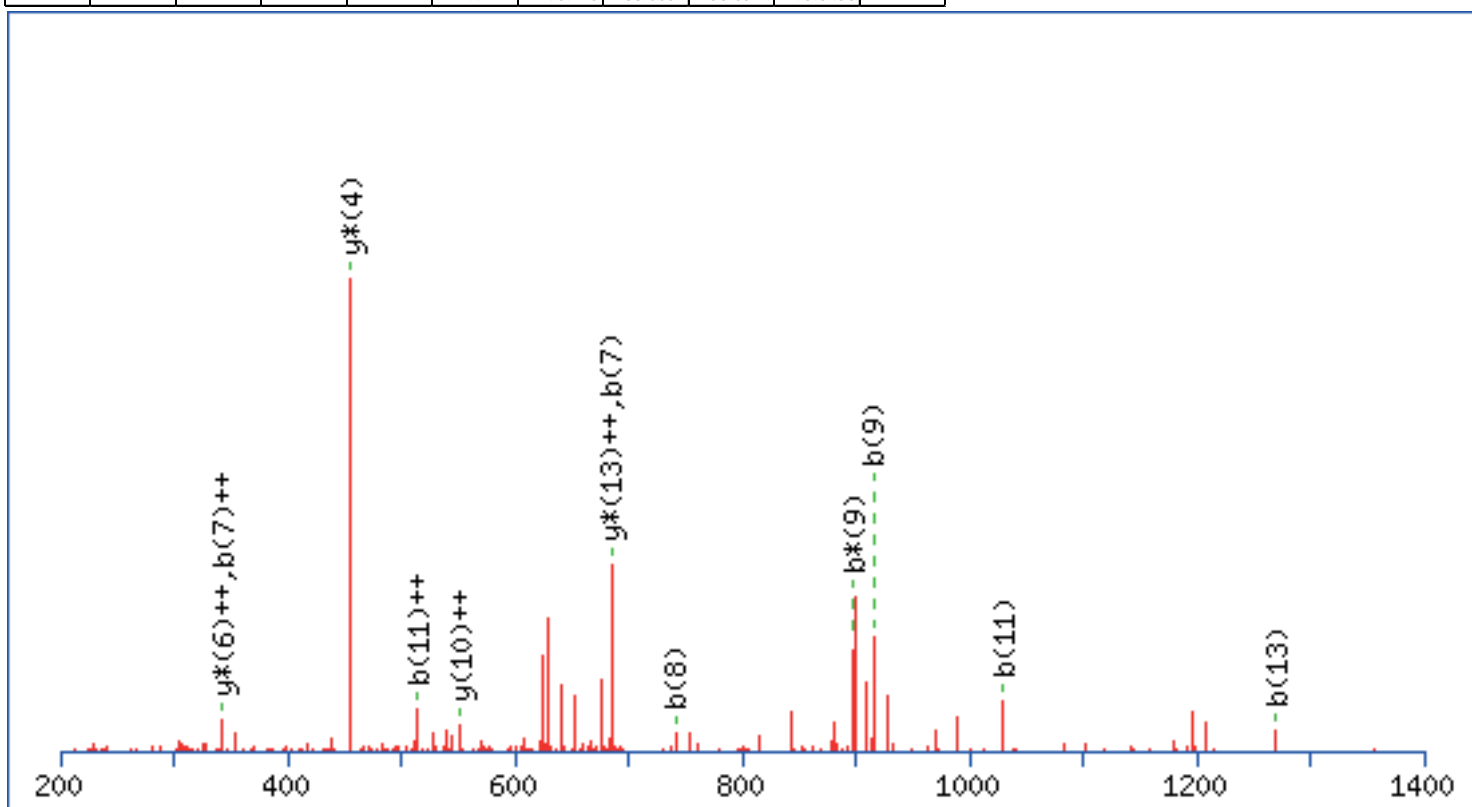

#6133 RT: 72.93 AV: 1  
 T: ITMS + c NSI d w Full ms2 722.92@cid35.00 [185.00-1460.00]

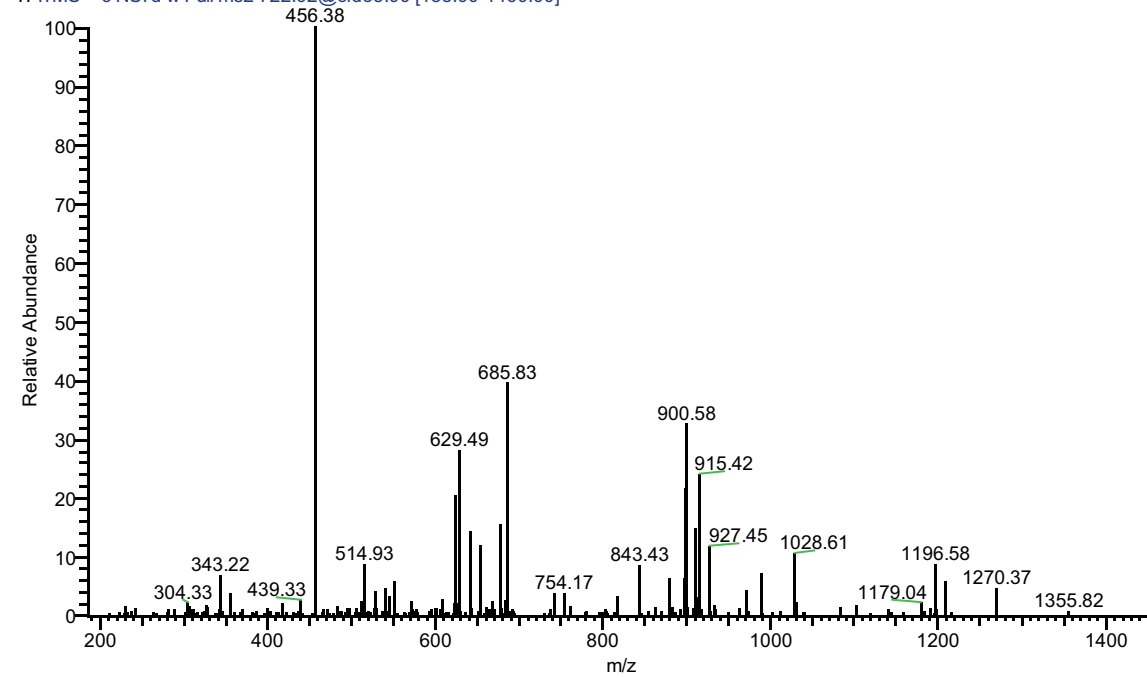



Match to Query 7926: 1443.829152 from(722.921852,2+)  
 1 cycles: 1 preIntensity: 2228569.7 FinneganScanNumber: 6133  
 Monoisotopic mass of neutral peptide Mr(calc): 1443.8428

(4-17) H4:  
 GKGGK(Ac)GLGKGGAK(Ac)R

Variable modifications:

K2 : Acetyl:2H(3) (K)            K9 : Acetyl:2H(3) (K)  
 K5 : Acetyl (K)                    K13 : Acetyl (K)

Ions Score: 21 Expect: 0.052

Matches : 12/102 fragment ions using 23 most intense peaks

| #  | b        | b <sup>++</sup> | b <sup>*</sup> | b <sup>***</sup> | Seq. | y        | y <sup>++</sup> | y <sup>*</sup> | y <sup>***</sup> | #  |
|----|----------|-----------------|----------------|------------------|------|----------|-----------------|----------------|------------------|----|
| 1  | 58.0287  | 29.518          |                |                  | G    |          |                 |                |                  | 14 |
| 2  | 231.1531 | 116.0802        | 214.1265       | 107.5669         | K    | 1387.829 | 694.418         | 1370.802       | 685.9047         | 13 |
| 3  | 288.1746 | 144.5909        | 271.148        | 136.0776         | G    | 1214.704 | 607.8558        | 1197.678       | 599.3425         | 12 |
| 4  | 345.196  | 173.1017        | 328.1695       | 164.5884         | G    | 1157.683 | 579.3451        | 1140.656       | 570.8318         | 11 |
| 5  | 515.3016 | 258.1544        | 498.275        | 249.6411         | K    | 1100.661 | 550.8343        | 1083.635       | 542.3211         | 10 |
| 6  | 572.323  | 286.6651        | 555.2965       | 278.1519         | G    | 930.5559 | 465.7816        | 913.5293       | 457.2683         | 9  |
| 7  | 685.4071 | 343.2072        | 668.3805       | 334.6939         | L    | 873.5344 | 437.2708        | 856.5079       | 428.7576         | 8  |
| 8  | 742.4285 | 371.7179        | 725.402        | 363.2046         | G    | 760.4503 | 380.7288        | 743.4238       | 372.2155         | 7  |
| 9  | 915.5529 | 458.2801        | 898.5264       | 449.7668         | K    | 703.4289 | 352.2181        | 686.4023       | 343.7048         | 6  |
| 10 | 972.5744 | 486.7908        | 955.5478       | 478.2775         | G    | 530.3045 | 265.6559        | 513.278        | 257.1426         | 5  |
| 11 | 1029.596 | 515.3016        | 1012.569       | 506.7883         | G    | 473.2831 | 237.1452        | 456.2565       | 228.6319         | 4  |
| 12 | 1100.633 | 550.8201        | 1083.606       | 542.3068         | A    | 416.2616 | 208.6344        | 399.235        | 200.1212         | 3  |
| 13 | 1270.739 | 635.8729        | 1253.712       | 627.3596         | K    | 345.2245 | 173.1159        | 328.1979       | 164.6026         | 2  |
| 14 |          |                 |                |                  | R    | 175.119  | 88.0631         | 158.0924       | 79.5498          | 1  |

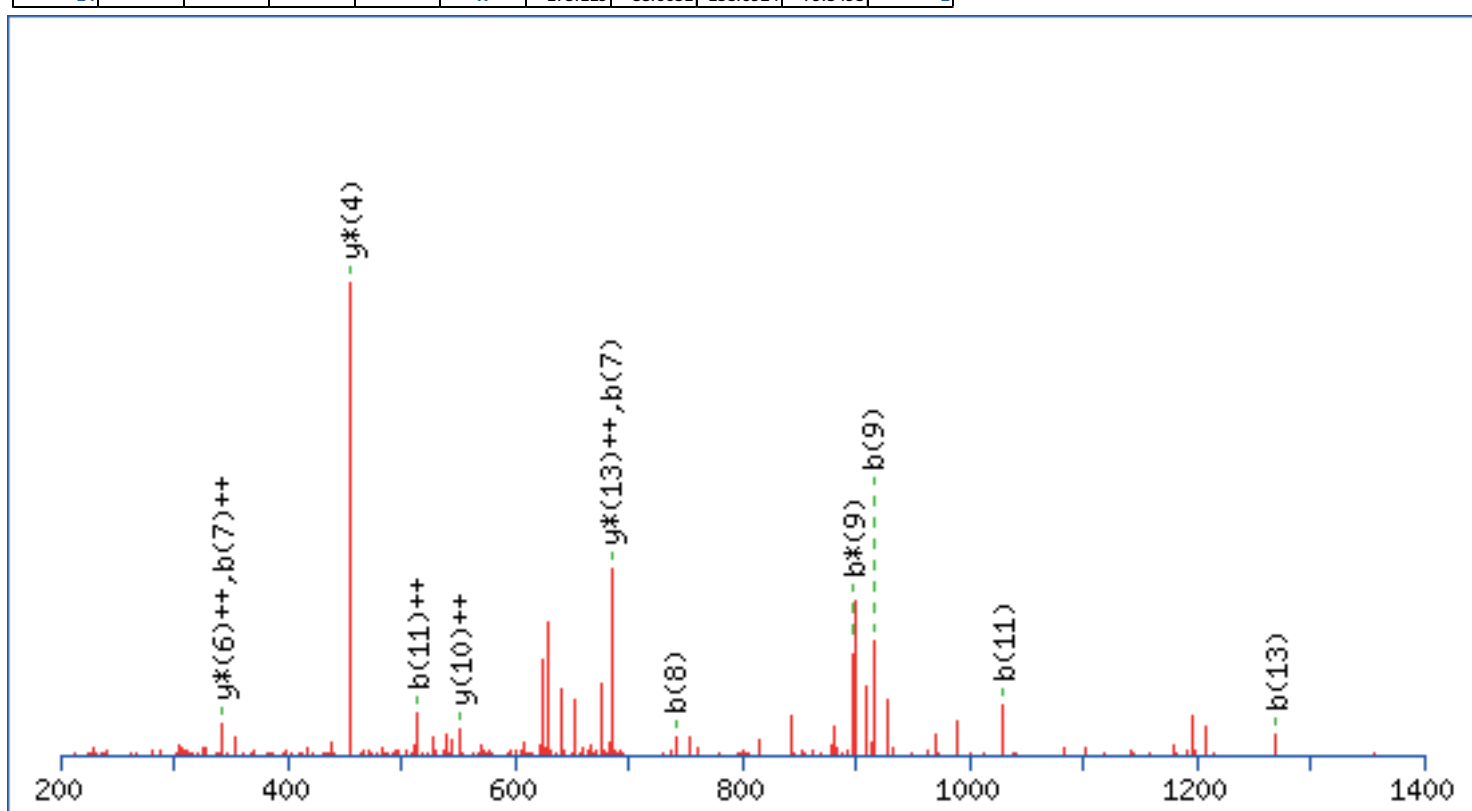

#6133 RT: 72.93 AV: 1  
 T: ITMS + c NSI d w Full ms2 722.92@cid35.00 [185.00-1460.00]

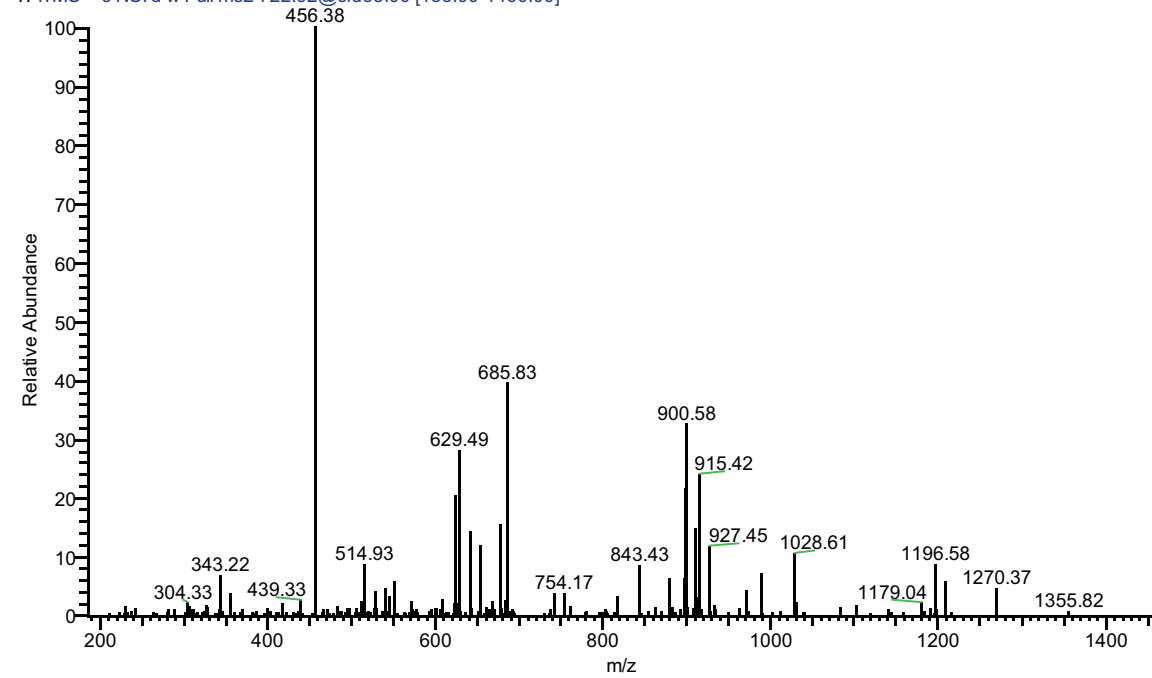

Match to Query X842: 1437.804400 from(719.909476,2+)

(4-17) H4:

1 cycles:1 preIntensity:2352466.7 FinneganScanNumber:2419

**GK(Ac)GGK(Ac)GLGK(Ac)GGAK(Ac)R**

Monoisotopic mass of neutral peptide Mr(calc): 1437.8052

Variable modifications:

K2 : Acetyl (K) K9 : Acetyl (K)  
 K5 : Acetyl (K) K13 : Acetyl (K)

Ions Score: 70 Expect: 7.1e-06

Matches : 37/102 fragment ions using 68 most intense peaks

| #  | b               | b <sup>++</sup> | b <sup>*</sup>  | b <sup>***</sup> | Seq. | y               | y <sup>++</sup> | y <sup>*</sup>  | y <sup>***</sup> | #  |
|----|-----------------|-----------------|-----------------|------------------|------|-----------------|-----------------|-----------------|------------------|----|
| 1  | 58.0287         | 29.518          |                 |                  | G    |                 |                 |                 |                  | 14 |
| 2  | <b>228.1343</b> | 114.5708        | 211.1077        | 106.0575         | K    | 1381.791        | 691.3992        | 1364.765        | 682.8859         | 13 |
| 3  | <b>285.1557</b> | 143.0815        | 268.1292        | 134.5682         | G    | <b>1211.686</b> | <b>606.3464</b> | <b>1194.659</b> | <b>597.8331</b>  | 12 |
| 4  | <b>342.1772</b> | 171.5922        | 325.1506        | 163.079          | G    | <b>1154.664</b> | <b>577.8357</b> | 1137.638        | <b>569.3224</b>  | 11 |
| 5  | <b>512.2827</b> | 256.645         | 495.2562        | 248.1317         | K    | <b>1097.643</b> | 549.3249        | 1080.616        | 540.8116         | 10 |
| 6  | <b>569.3042</b> | <b>285.1557</b> | 552.2776        | 276.6425         | G    | <b>927.537</b>  | 464.2722        | <b>910.5105</b> | <b>455.7589</b>  | 9  |
| 7  | <b>682.3883</b> | <b>341.6978</b> | 665.3617        | 333.1845         | L    | <b>870.5156</b> | 435.7614        | 853.489         | 427.2482         | 8  |
| 8  | <b>739.4097</b> | 370.2085        | 722.3832        | 361.6952         | G    | <b>757.4315</b> | 379.2194        | 740.405         | 370.7061         | 7  |
| 9  | <b>909.5152</b> | <b>455.2613</b> | <b>892.4887</b> | 446.748          | K    | 700.4101        | 350.7087        | 683.3835        | <b>342.1954</b>  | 6  |
| 10 | <b>966.5367</b> | 483.772         | 949.5102        | 475.2587         | G    | <b>530.3045</b> | 265.6559        | 513.278         | 257.1426         | 5  |
| 11 | <b>1023.558</b> | <b>512.2827</b> | 1006.532        | 503.7694         | G    | <b>473.2831</b> | 237.1452        | 456.2565        | <b>228.6319</b>  | 4  |
| 12 | <b>1094.595</b> | 547.8013        | 1077.569        | 539.288          | A    | <b>416.2616</b> | 208.6344        | 399.235         | 200.1212         | 3  |
| 13 | <b>1264.701</b> | 632.854         | <b>1247.674</b> | 624.3408         | K    | <b>345.2245</b> | 173.1159        | 328.1979        | 164.6026         | 2  |
| 14 |                 |                 |                 |                  | R    | 175.119         | 88.0631         | 158.0924        | 79.5498          |    |

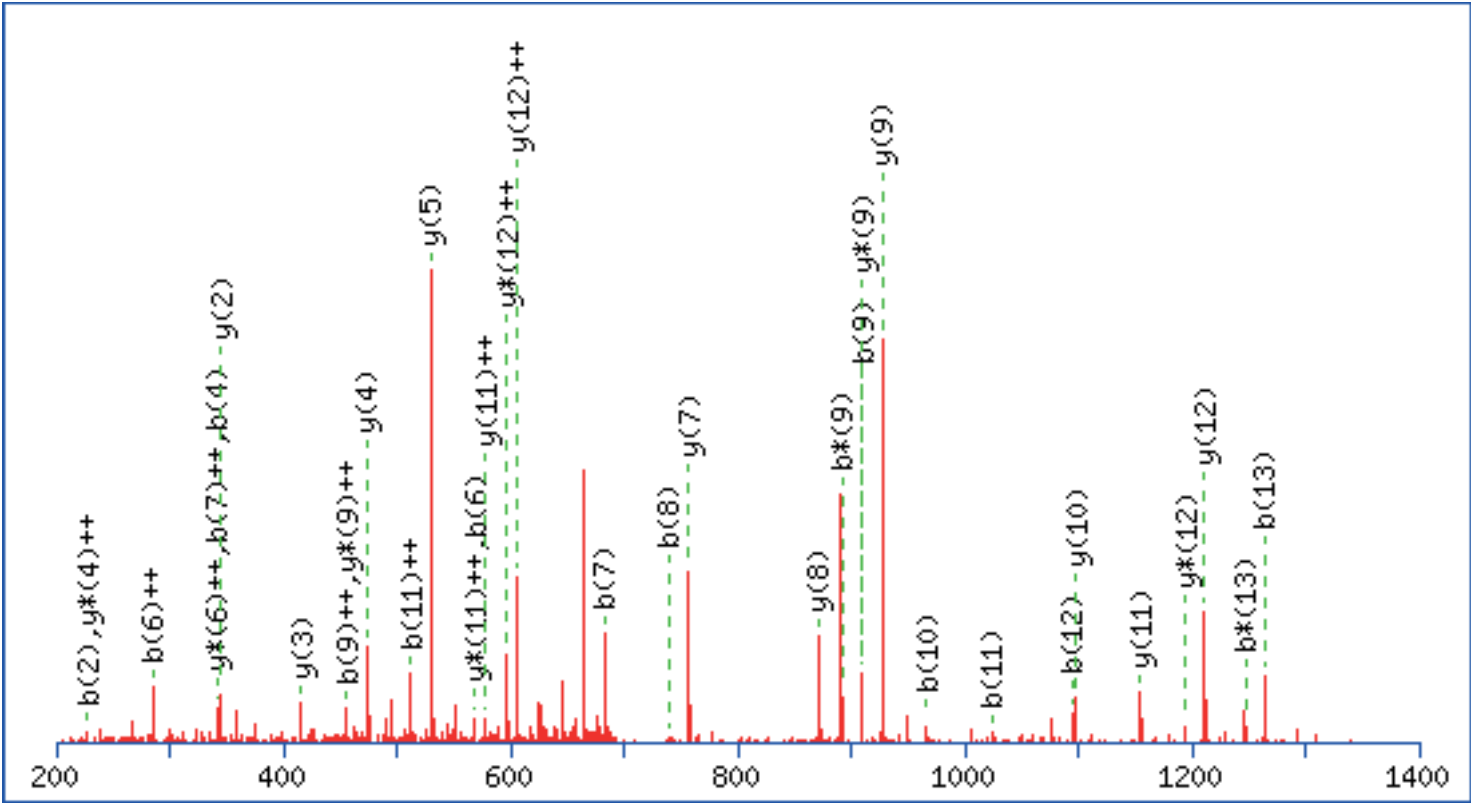

#2419 RT: 47.95  
 T: ITMS + c NSI d w Full ms2 719.91@cid35.00 [185.00-1450.00]

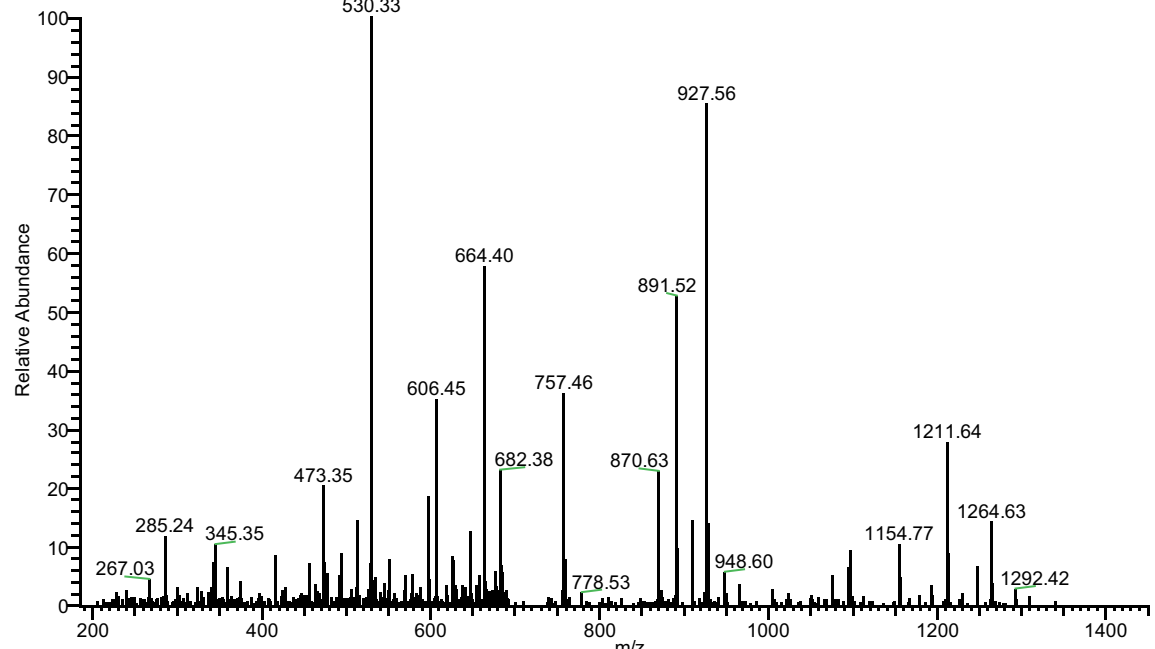

Supplement: supp_M112.024307_mcp.M112.024307-5.pdf [file supp_M112.024307_mcp.M112.024307-5.pdf]
