# Supplementary material for: The Proteomic Investigation of Chromatin Functional Domains Reveals Novel Synergisms among Distinct Heterochromatin Components
Source: PubMed Central journal article supplement — Mol Cell Proteomics. 2013 Jan 14;12(3):764–80. doi: 10.1074/mcp.M112.024307 (PMC3591667; doi:10.1074/mcp.m112.024307), 2013-01-14

# The proteomic investigation of chromatin functional domains reveals novel synergisms among distinct heterochromatin components

Monica Soldi and Tiziana Bonaldi

## SUPPLEMENTAL FIGURES

Soldi *et al.*, 2012 Figure S1

**A**

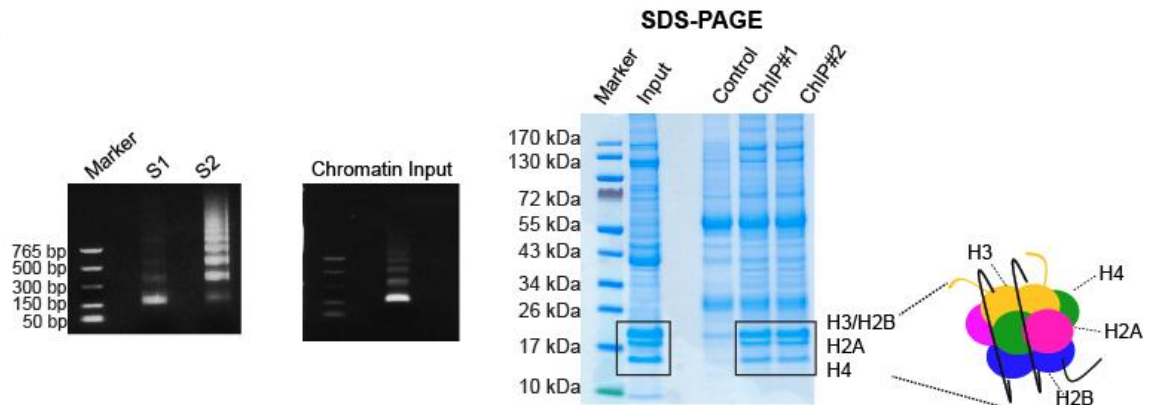

**B**

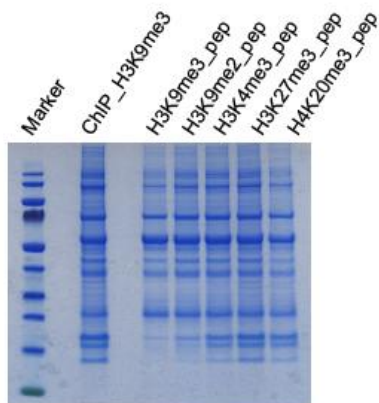

**C**

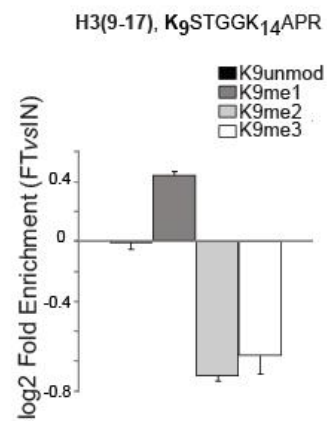

Soldi *et al.*, 2012 Figure S2

**Peptide H3\_3-8**

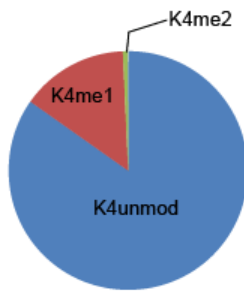

**Peptide H3\_9-17**

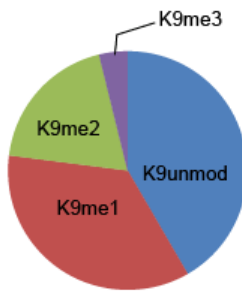

**Peptide H3\_9-17\_K14Ac**

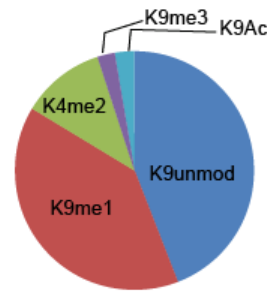

**Peptide H3\_18-23**

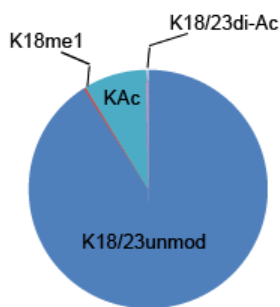

**Peptide H3\_73-83**

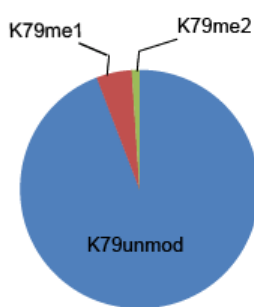

**Peptide H3\_27-40**

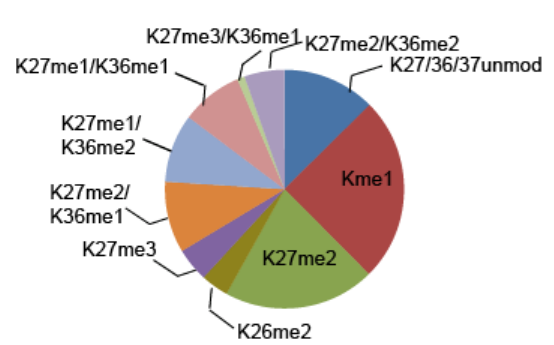

**Peptide H4\_4-17**

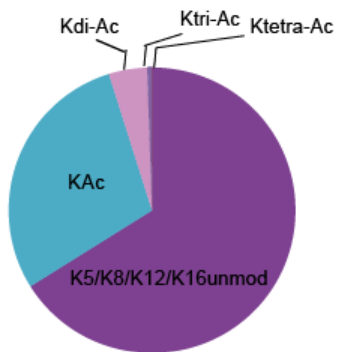

**Peptide H2A\_4-11**

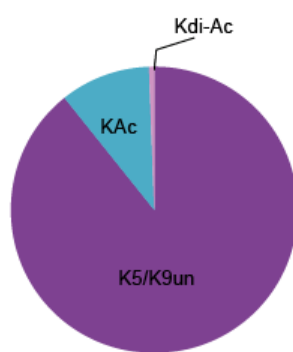

**A** H3 (3-8), TK<sub>4</sub>QTAR

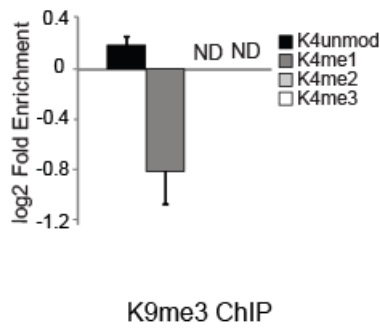

**B** H3 (9-17), K<sub>9</sub>STGGK<sub>14</sub>APR

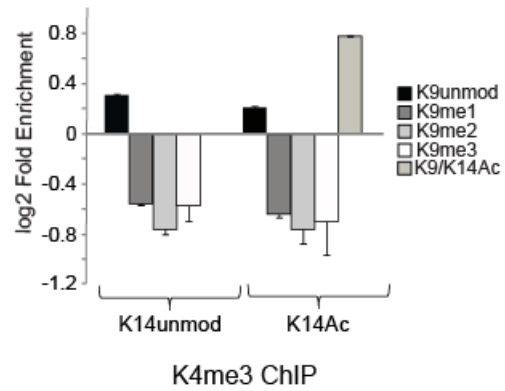

**C** H3 (18-26), KQLATK(Ac)AAR(me<sub>2</sub>)

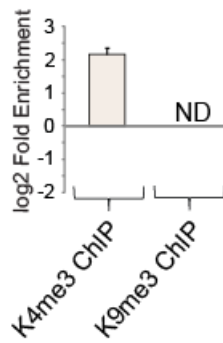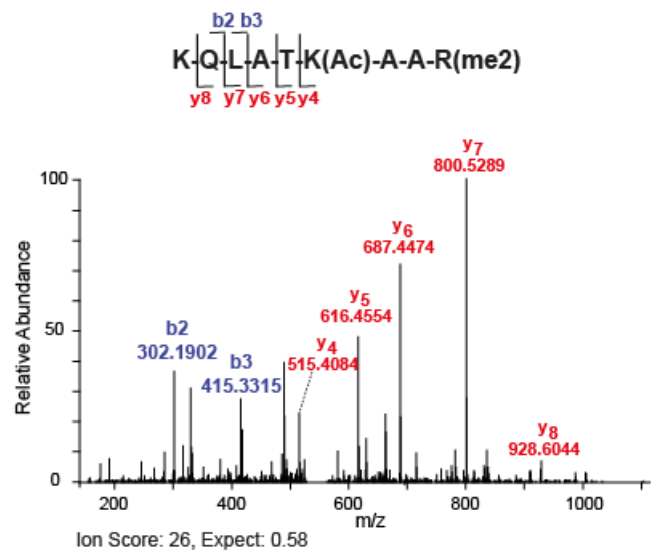

Soldi *et al.*, 2012 Figure S4

**A** H3K9me3 ChIP

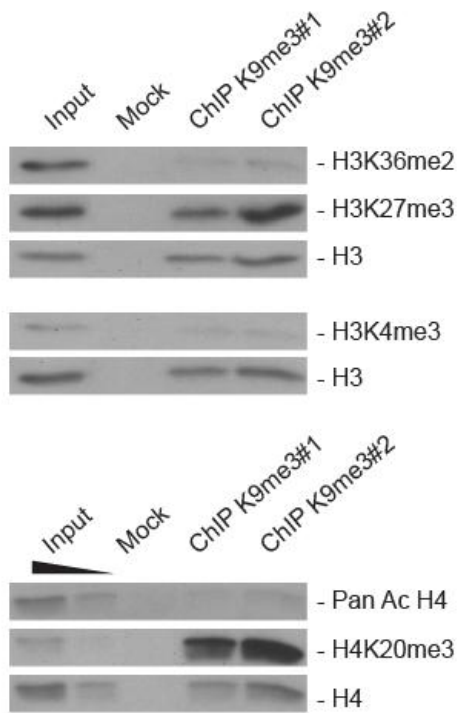

**B** H3K4me3 ChIP

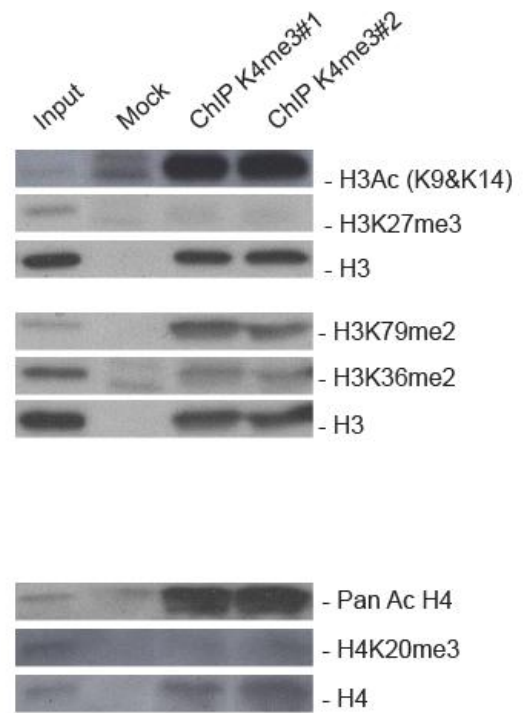

**C**

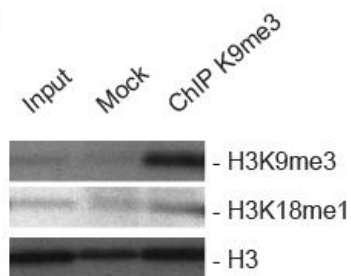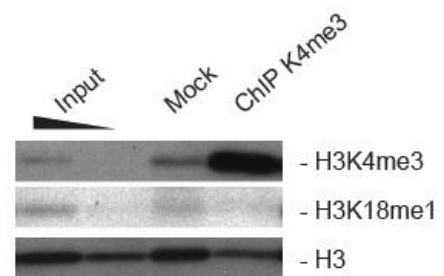

Soldi *et al.*, 2012 Figure S5

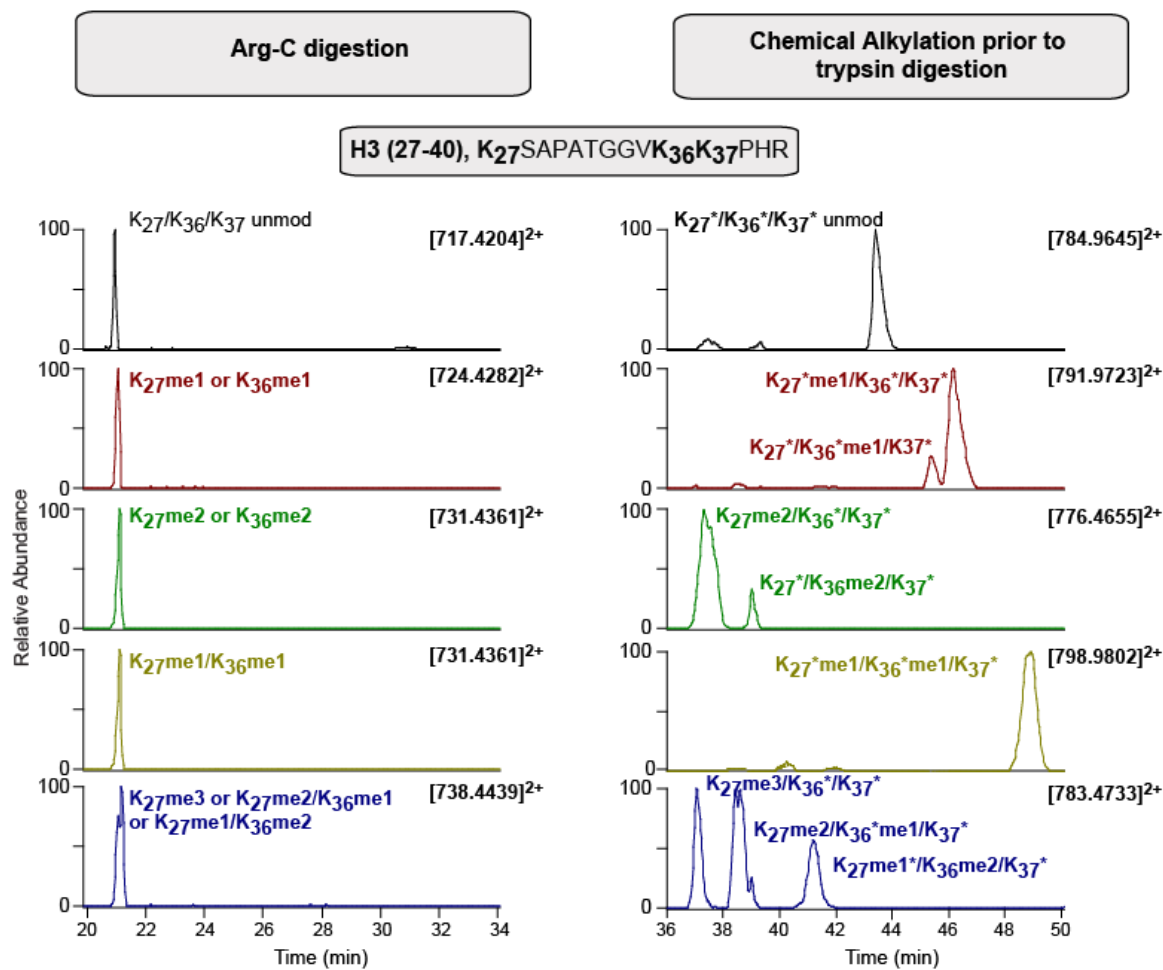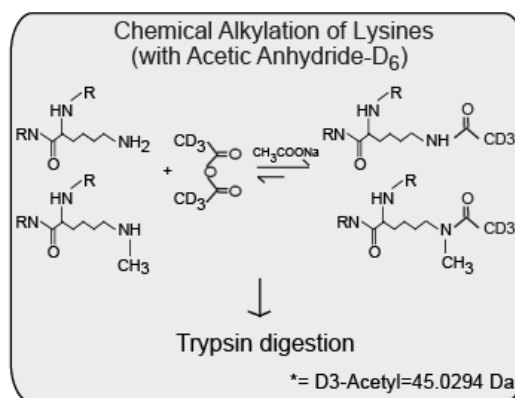

**A**

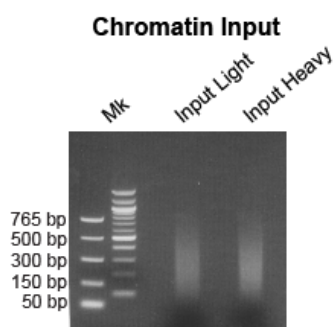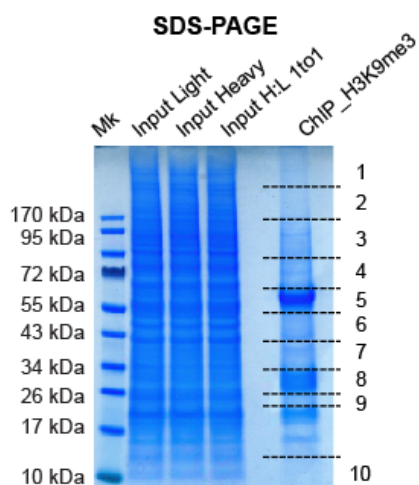

**B Survey scan Input**

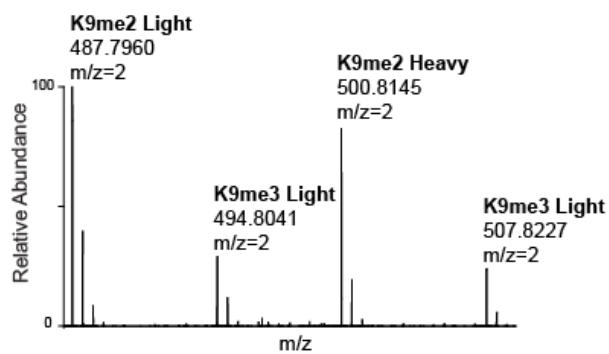

**Survey scan H3K9me3 ChIP**

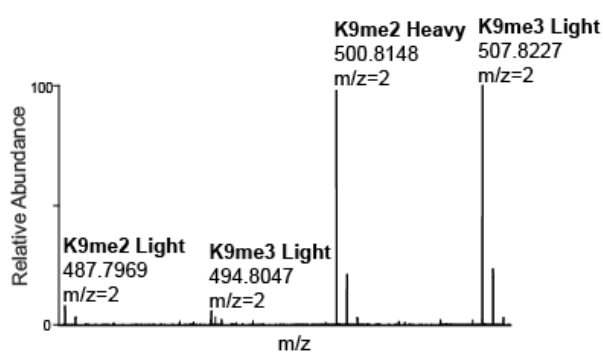

**Input XIC**

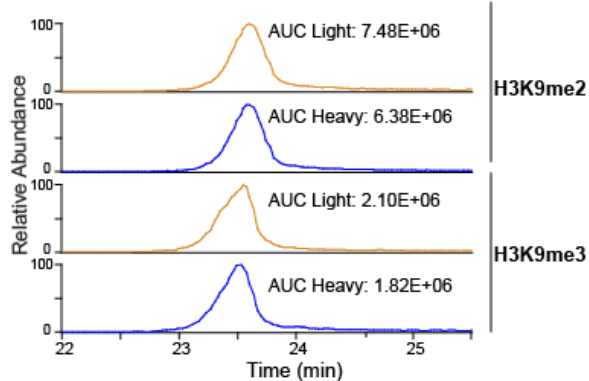

**H3K9me3 ChIP XIC**

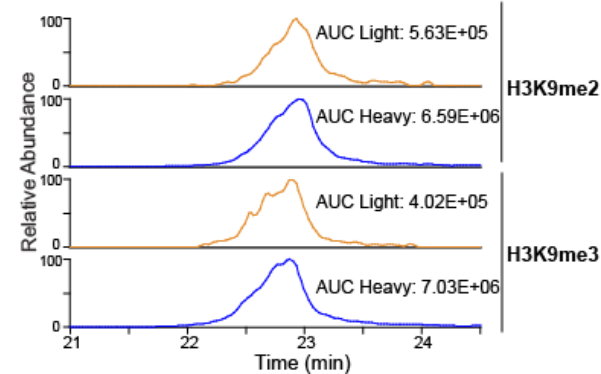

**C H3(9-17), KgSTGGK14APR**

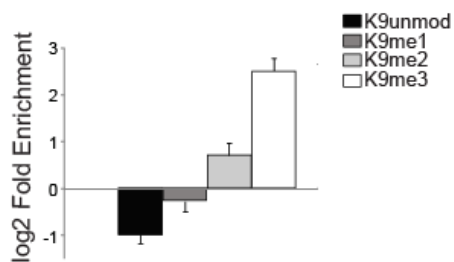

**D H3K4me3 X-ChIP**

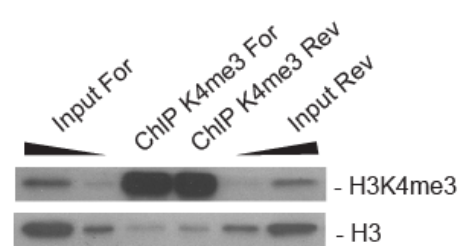

**A**

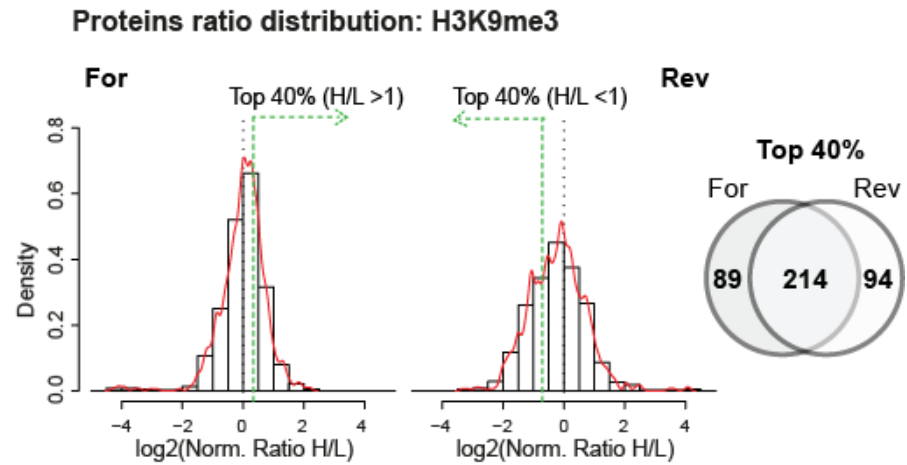

**B**

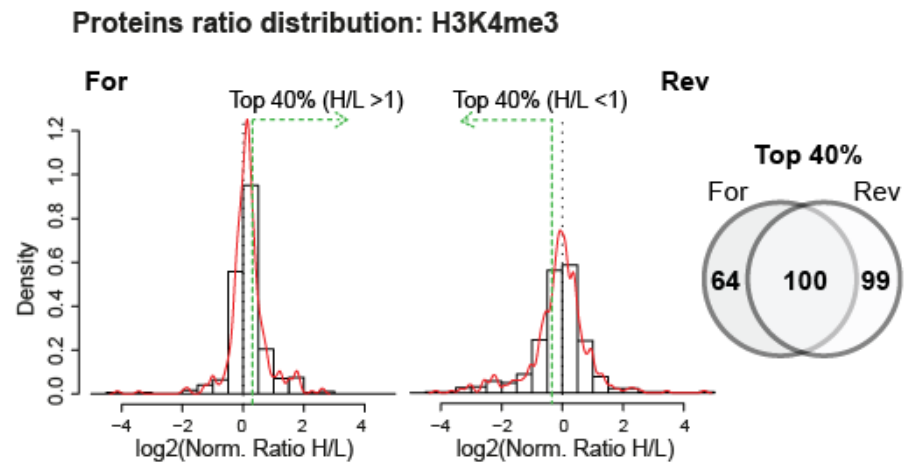

**C**

**X-ChIP Match**  
Common protein, Ratio ≥ 1

H3K9me3 H3K4me3

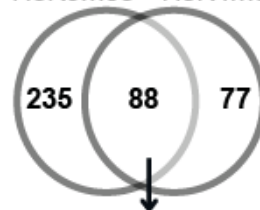

Enriched proteins (Top 40%)

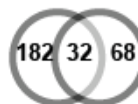

Soldi *et al.*, 2012 Figure S8

**A**

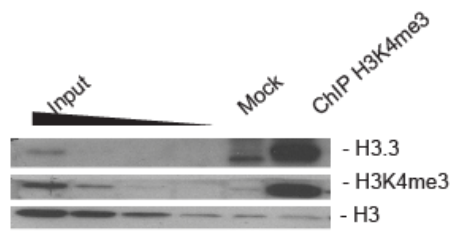

**B**

H1.2/H1.4 (86-97)-H1.5 (89-100) SLVSKme1GTLVQTK

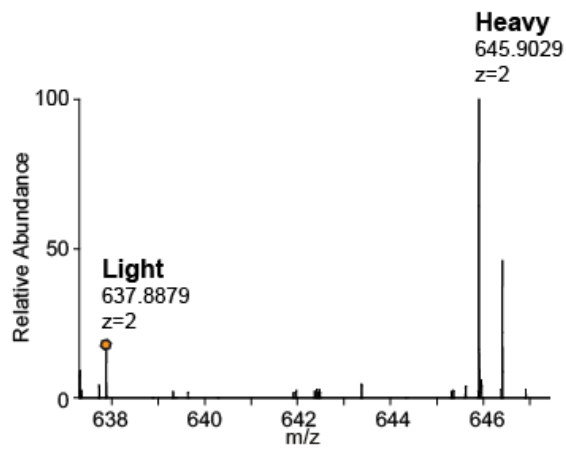

**C**

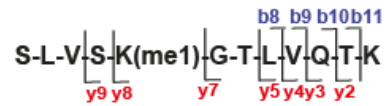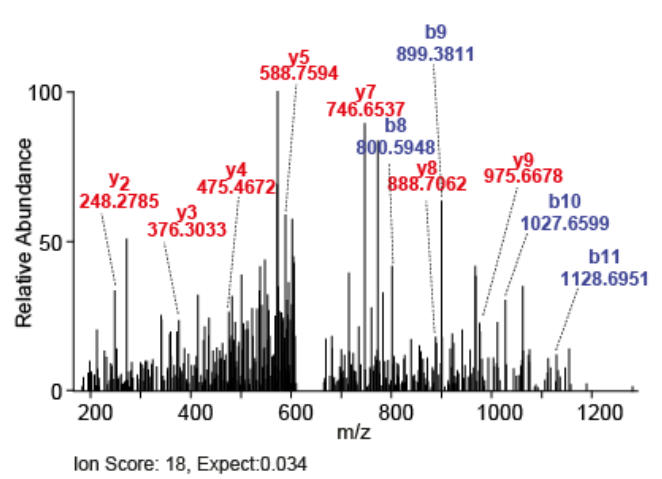



Soldi et al., 2012 Figure S9

A)

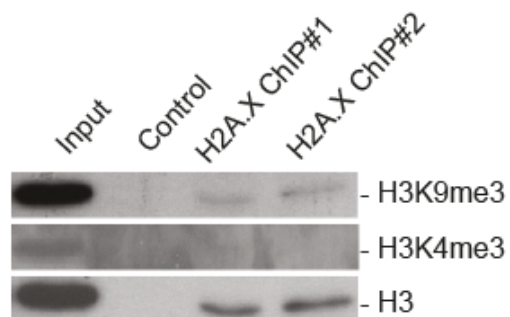

B)

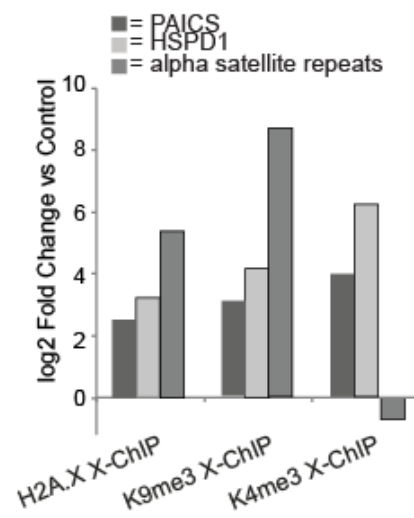

Supplement: supp_M112.024307_SoldietalSupplementalFiguresMCP_024307.pdf [file supp_M112.024307_SoldietalSupplementalFiguresMCP_024307.pdf]
